# Supplementary material for: Construction of predictive model of interstitial fibrosis and tubular atrophy after kidney transplantation with machine learning algorithms
Source: Front Genet. 2023 Nov 1;14:1276963. doi: 10.3389/fgene.2023.1276963 (PMC10646529; doi:10.3389/fgene.2023.1276963)
Supplement: Supplementary file 1 [file Table1.xlsx]

## Sheet: Table S1
Tag	logFC	AveExpr	t	P.Value	adj.P.Val	B
COPE	-0.243514	9.05568	-11.0504	7.73854e-27	8.29649e-23	49.9036
BLOC1S1	-0.291806	9.60835	-10.7609	1.32297e-25	7.09177e-22	47.1417
MCRS1	-0.226372	7.3057	-9.43261	2.79932e-20	9.84912e-17	35.2242
HIGD2A	-0.159764	10.3271	-9.40144	3.6747e-20	9.84912e-17	34.9601
BAG5	0.243554	9.08044	9.29478	9.2743e-20	1.9886e-16	34.0615
ARL2	-0.214366	8.5172	-9.16901	2.73263e-19	4.88275e-16	33.0129
POLR2E	-0.224776	9.38172	-9.11802	4.22031e-19	5.73257e-16	32.5911
MRPS34	-0.184079	9.10193	-9.11643	4.27764e-19	5.73257e-16	32.5781
GPS2	-0.210474	8.83128	-9.05193	7.3912e-19	8.80456e-16	32.0475
STUB1	-0.164143	9.33015	-8.92596	2.13089e-18	2.12834e-15	31.0205
CUEDC2	-0.137225	9.25934	-8.92303	2.18372e-18	2.12834e-15	30.9968
ASNA1	-0.267179	9.09986	-8.85908	3.71972e-18	3.32326e-15	30.4803
PHB2	-0.162422	10.7221	-8.79799	6.16915e-18	5.08765e-15	29.9898
PPP4C	-0.195009	8.88132	-8.78658	6.77819e-18	5.15801e-15	29.8985
UBA1	-0.216438	9.04365	-8.77898	7.2167e-18	5.15801e-15	29.8378
PES1	-0.181094	7.53018	-8.70769	1.29625e-17	8.68569e-15	29.27
TXN2	-0.1705	9.30874	-8.62288	2.58831e-17	1.63231e-14	28.5999
TOMM40	-0.202298	7.0038	-8.61332	2.7971e-17	1.66598e-14	28.5247
CST3	-0.225241	11.394	-8.58778	3.44009e-17	1.87678e-14	28.3242
MRPL4	-0.192814	8.02419	-8.58109	3.63139e-17	1.87678e-14	28.2717
POLR2L	-0.201152	10.6888	-8.57958	3.67618e-17	1.87678e-14	28.2599
MTMR14	-0.14813	7.17731	-8.47719	8.3789e-17	4.08319e-14	27.4617
RSBN1	0.201466	7.97518	8.38761	1.711e-16	7.97549e-14	26.7702
UCKL1	-0.15464	7.52879	-8.30041	3.40753e-16	1.52217e-13	26.1032
RAD23B	-0.182418	9.69047	-8.12459	1.34165e-15	5.75352e-13	24.7766
NAA10	-0.16499	8.77279	-8.0836	1.84014e-15	7.58773e-13	24.4709
ILK	-0.200423	9.15425	-8.00176	3.44375e-15	1.36742e-12	23.8646
SH3GL1	-0.133953	8.09465	-7.97362	4.26668e-15	1.63368e-12	23.6574
ALG3	-0.175181	8.04216	-7.96444	4.57507e-15	1.69136e-12	23.5899
YWHAQ	0.173484	10.0913	7.91182	6.81521e-15	2.43553e-12	23.2045
HTRA2	-0.125254	7.95317	-7.88468	8.36304e-15	2.89226e-12	23.0066
RAB11A	0.179828	9.20151	7.85351	1.05713e-14	3.49886e-12	22.78
TIMM22	-0.16699	7.494	-7.85103	1.07697e-14	3.49886e-12	22.762
RAI2	0.25526	7.3913	7.83796	1.18784e-14	3.74554e-12	22.6673
SPTLC1	0.176664	9.47006	7.81352	1.4262e-14	4.25376e-12	22.4905
BBS4	0.15022	7.80196	7.81332	1.42837e-14	4.25376e-12	22.4891
NAPA	-0.255251	8.28489	-7.66052	4.43153e-14	1.28407e-11	21.3949
MRPL12	-0.158213	8.25929	-7.65534	4.60352e-14	1.2988e-11	21.3581
TNS1	-0.266134	8.65318	-7.65123	4.74457e-14	1.30427e-11	21.329
HNRNPA1	0.114101	12.0499	7.62889	5.58869e-14	1.49791e-11	21.1708
BCKDHA	-0.192551	8.56267	-7.60806	6.50817e-14	1.70181e-11	21.0237
STX10	-0.148561	8.66414	-7.59246	7.29301e-14	1.86163e-11	20.9137
TRIT1	0.160697	7.60496	7.58586	7.65248e-14	1.90796e-11	20.8672
WDR11	0.185805	9.42622	7.57969	8.0044e-14	1.91123e-11	20.8238
SGPL1	0.169255	7.68924	7.57938	8.02213e-14	1.91123e-11	20.8217
TBL2	0.14426	8.0535	7.54673	1.01707e-13	2.33546e-11	20.5925
RSPH6A	-0.170449	4.38253	-7.54581	1.02385e-13	2.33546e-11	20.5861
SNRPA	-0.166389	8.05706	-7.52314	1.20663e-13	2.66707e-11	20.4275
PPP1CA	-0.154906	10.4962	-7.51923	1.24119e-13	2.66707e-11	20.4002
IDH3G	-0.146303	9.71577	-7.51894	1.24385e-13	2.66707e-11	20.3981
C22orf46	-0.149926	5.2172	-7.50694	1.3565e-13	2.85158e-11	20.3144
PQBP1	-0.161426	8.7219	-7.48731	1.56277e-13	3.22201e-11	20.1778
CLPP	-0.139759	8.73543	-7.45723	1.94027e-13	3.92484e-11	19.9689
TNKS2	-0.259269	8.32312	-7.44532	2.11332e-13	4.19572e-11	19.8864
PFN1	-0.246225	11.3846	-7.44115	2.1774e-13	4.24434e-11	19.8576
ZMAT5	-0.143579	6.78934	-7.41954	2.5418e-13	4.86618e-11	19.7082
PSMF1	0.125454	8.08264	7.41234	2.67583e-13	5.0329e-11	19.6586
ERI3	-0.237483	8.33107	-7.40801	2.75984e-13	5.10142e-11	19.6288
DRAP1	-0.171356	8.0275	-7.40552	2.80935e-13	5.10493e-11	19.6117
PEX19	-0.190321	8.21686	-7.39492	3.03009e-13	5.41426e-11	19.5387
AP2S1	-0.164929	9.7666	-7.37739	3.43287e-13	6.0334e-11	19.4182
AP2M1	-0.265615	9.92668	-7.36709	3.69381e-13	6.24467e-11	19.3475
MLST8	-0.160232	7.7834	-7.36527	3.74181e-13	6.24467e-11	19.3351
IPO13	-0.226089	8.06943	-7.36388	3.77885e-13	6.24467e-11	19.3256
FGD1	-0.133631	5.40231	-7.36361	3.78606e-13	6.24467e-11	19.3237
EIF4EBP1	-0.188161	8.18399	-7.33515	4.63274e-13	7.52539e-11	19.129
PTTG1IP	0.154127	11.5482	7.32089	5.1244e-13	8.1998e-11	19.0317
TECR	-0.217525	10.2165	-7.27154	7.25542e-13	1.1439e-10	18.6962
ERAL1	-0.148569	6.92098	-7.23739	9.21794e-13	1.43225e-10	18.4653
NF1	-0.145697	7.82936	-7.22693	9.91748e-13	1.51893e-10	18.3948
TMED2	0.316349	10.582	7.21783	1.05687e-12	1.59588e-10	18.3335
TBX1	-0.165607	5.56915	-7.21348	1.08939e-12	1.62214e-10	18.3042
BCKDK	-0.154101	8.03712	-7.19459	1.24268e-12	1.82504e-10	18.1773
KIF4A	-0.12846	5.77282	-7.19187	1.2665e-12	1.83488e-10	18.159
TADA3	-0.131834	8.41772	-7.18046	1.37104e-12	1.95985e-10	18.0825
CAPNS1	-0.169271	10.6168	-7.17804	1.39429e-12	1.96686e-10	18.0663
MSTO1	-0.161681	5.93821	-7.14341	1.77268e-12	2.46817e-10	17.8348
C11orf49	-0.122679	7.97439	-7.13103	1.93106e-12	2.65421e-10	17.7523
SSNA1	-0.153273	8.75987	-7.1137	2.17635e-12	2.9535e-10	17.6371
ARL2BP	0.110645	9.15576	7.10015	2.38926e-12	3.20191e-10	17.5471
CPSF7	-0.149132	8.27439	-7.07049	2.92913e-12	3.87694e-10	17.3508
YPEL5	0.126126	10.029	7.06115	3.12292e-12	4.08302e-10	17.2891
POLD4	-0.189333	9.05746	-7.05757	3.20038e-12	4.13389e-10	17.2655
POLD2	-0.146808	9.06004	-7.05073	3.35381e-12	4.2373e-10	17.2203
ZNF14	0.156048	5.14977	7.05048	3.35949e-12	4.2373e-10	17.2187
TSPAN31	0.124579	8.53664	7.0482	3.41214e-12	4.25366e-10	17.2037
PWWP2A	0.183315	7.39645	7.04417	3.5076e-12	4.29694e-10	17.1771
EXOSC4	-0.164179	7.47915	-7.04205	3.55869e-12	4.29694e-10	17.1632
PCGF1	-0.144751	7.10426	-7.04171	3.56709e-12	4.29694e-10	17.1609
GLT8D1	0.112873	8.89953	7.02782	3.9218e-12	4.67174e-10	17.0696
GPATCH3	-0.137182	6.64043	-7.02132	4.09955e-12	4.82981e-10	17.0269
GMPPA	-0.180055	7.16785	-6.97473	5.62685e-12	6.55712e-10	16.7219
LPAL2	-0.126512	4.95385	-6.96624	5.95969e-12	6.8703e-10	16.6665
PSMC4	-0.128873	8.70577	-6.96342	6.07439e-12	6.92804e-10	16.6481
HSPB1	-0.221791	11.338	-6.95549	6.40913e-12	7.23287e-10	16.5965
OS9	-0.154937	9.94715	-6.94958	6.67043e-12	7.44934e-10	16.558
FARSA	-0.128448	7.05765	-6.94618	6.82554e-12	7.51014e-10	16.5359
SMTN	-0.176021	7.83073	-6.94532	6.86497e-12	7.51014e-10	16.5303
PPP2CA	0.134809	9.14653	6.93906	7.16132e-12	7.7552e-10	16.4896
CLTB	-0.155328	8.25164	-6.92227	8.01939e-12	8.59759e-10	16.3806
TSPYL4	0.146075	9.08285	6.91925	8.18423e-12	8.68744e-10	16.3611
CLPTM1	-0.33955	9.27587	-6.91129	8.63427e-12	9.07529e-10	16.3095
CHRND	-0.130582	6.47325	-6.86275	1.19542e-11	1.24428e-09	15.9963
LMBRD1	0.123051	9.62886	6.84753	1.3232e-11	1.36404e-09	15.8985
GBF1	-0.135436	7.41024	-6.83885	1.40207e-11	1.43159e-09	15.8428
2023-09-02	0.14126	10.5116	6.83106	1.47667e-11	1.49352e-09	15.7929
OGG1	-0.18549	8.48511	-6.82474	1.54014e-11	1.54316e-09	15.7524
ANKMY2	0.140117	8.69163	6.8185	1.60529e-11	1.59355e-09	15.7125
MRPS2	-0.158897	8.74402	-6.8135	1.65956e-11	1.63231e-09	15.6805
HARS2	0.131437	7.40732	6.79221	1.91119e-11	1.86271e-09	15.5447
GPAA1	-0.15775	8.86254	-6.77737	2.10836e-11	2.03637e-09	15.4502
SLC4A2	-0.186163	7.85841	-6.77479	2.14455e-11	2.05283e-09	15.4339
BLMH	0.164669	8.53947	6.74597	2.59349e-11	2.4606e-09	15.251
RBL1	-0.128955	5.21986	-6.73304	2.82376e-11	2.65557e-09	15.1692
TSC22D1	0.225062	9.85482	6.72629	2.95166e-11	2.75171e-09	15.1265
PCDHA10	-0.140982	4.40933	-6.71745	3.12805e-11	2.89102e-09	15.0707
KDELR1	-0.12528	10.1694	-6.71591	3.15978e-11	2.89539e-09	15.061
PIK3R2	-0.125533	6.82169	-6.69616	3.59608e-11	3.26725e-09	14.9366
SLC44A1	0.169597	9.18949	6.67983	4.00108e-11	3.60467e-09	14.834
EXOSC5	-0.124918	7.12307	-6.66929	4.28553e-11	3.82763e-09	14.7679
SMAD2	0.12234	8.03063	6.66807	4.31997e-11	3.82763e-09	14.7602
MPZL2	0.302325	7.58783	6.66414	4.43202e-11	3.89472e-09	14.7356
DBR1	0.196538	5.96278	6.6548	4.7097e-11	4.1051e-09	14.6772
TEX261	-0.145426	8.3208	-6.65228	4.78758e-11	4.13932e-09	14.6614
HOXB8	0.292255	7.76793	6.63836	5.24056e-11	4.49472e-09	14.5745
ABCF2	-0.130213	6.99807	-6.61647	6.03963e-11	5.13895e-09	14.4381
ABO	-0.138692	5.51332	-6.60078	6.68441e-11	5.6428e-09	14.3406
CUL7	-0.0899518	7.1962	-6.59119	7.11109e-11	5.95609e-09	14.2811
RRAGB	0.156895	7.29187	6.58583	7.36142e-11	6.11797e-09	14.2479
SEC61A2	-0.121792	5.80542	-6.57813	7.73564e-11	6.37952e-09	14.2002
UBE2M	-0.180237	8.03389	-6.56173	8.59629e-11	7.03518e-09	14.0988
ZNF512B	-0.138021	7.617	-6.55952	8.7196e-11	7.08204e-09	14.0851
C10orf95	-0.112098	7.033	-6.55348	9.06447e-11	7.30678e-09	14.0479
ZDHHC13	0.201696	6.18436	6.55008	9.26399e-11	7.41189e-09	14.0269
INO80B	-0.149953	7.59852	-6.54759	9.41331e-11	7.47556e-09	14.0116
FUBP3	0.139487	8.44211	6.54241	9.731e-11	7.67103e-09	13.9797
TIMM44	-0.132428	7.10288	-6.53374	1.02868e-10	8.04996e-09	13.9263
TRIP4	0.141298	7.63768	6.53177	1.04178e-10	8.0934e-09	13.9142
COPZ1	-0.137747	9.72199	-6.52558	1.08385e-10	8.35969e-09	13.8761
CCBL1	-0.140862	7.64855	-6.52365	1.09727e-10	8.37256e-09	13.8643
EIF5A	-0.163998	10.6541	-6.5231	1.10114e-10	8.37256e-09	13.8609
DNPEP	-0.126465	8.33669	-6.52115	1.11498e-10	8.41807e-09	13.8489
TSR2	-0.117704	8.10324	-6.51208	1.18146e-10	8.85761e-09	13.7933
FURIN	-0.145121	7.66953	-6.49454	1.32126e-10	9.83697e-09	13.6859
EPHX1	-0.31393	8.92646	-6.49003	1.35969e-10	1.00533e-08	13.6583
CNOT2	0.144916	8.72374	6.48471	1.40657e-10	1.03287e-08	13.6258
YWHAB	0.114304	11.3889	6.46701	1.57391e-10	1.14788e-08	13.5178
RENBP	-0.338841	7.39734	-6.45835	1.66278e-10	1.19676e-08	13.4651
SERINC3	0.126912	9.28276	6.4583	1.66325e-10	1.19676e-08	13.4648
KLHL9	0.15953	8.44924	6.44204	1.84363e-10	1.3177e-08	13.3659
PSMC3	-0.179059	9.34262	-6.43724	1.90035e-10	1.34925e-08	13.3368
CMTM6	0.180071	10.3192	6.43066	1.98103e-10	1.39334e-08	13.2969
YWHAZ	0.152924	11.4066	6.43007	1.98845e-10	1.39334e-08	13.2933
TDG	0.166	7.69408	6.41935	2.12749e-10	1.48109e-08	13.2284
ATP6V0D1	-0.192542	10.3876	-6.41588	2.17462e-10	1.50255e-08	13.2074
CNKSR2	-0.138205	4.72003	-6.41429	2.19641e-10	1.50255e-08	13.1978
QTRT1	-0.172507	7.87041	-6.41401	2.20036e-10	1.50255e-08	13.1961
DYRK3	0.12957	5.9314	6.40861	2.27646e-10	1.54468e-08	13.1634
RAB1B	-0.117387	8.9996	-6.40752	2.29211e-10	1.54552e-08	13.1569
SIRT6	-0.211463	7.28975	-6.39599	2.46449e-10	1.65137e-08	13.0872
SNAPC2	-0.143208	6.23133	-6.38465	2.64634e-10	1.7622e-08	13.0189
HOXB3	0.250643	8.39743	6.38118	2.70458e-10	1.78987e-08	12.998
RRP9	-0.118296	6.52106	-6.37111	2.88074e-10	1.88884e-08	12.9375
NDUFV1	-0.127581	9.22194	-6.37063	2.88938e-10	1.88884e-08	12.9346
ASPSCR1	-0.184759	7.99535	-6.36253	3.03957e-10	1.97499e-08	12.8859
TPI1	-0.107161	11.7561	-6.36145	3.06011e-10	1.97635e-08	12.8795
DYRK1B	-0.13878	6.8321	-6.35557	3.17469e-10	2.03807e-08	12.8442
FUT5	-0.150227	6.46264	-6.35321	3.22189e-10	2.05606e-08	12.83
SENP3	-0.144707	7.68514	-6.33589	3.58964e-10	2.27719e-08	12.7263
GREB1	-0.122019	4.90955	-6.33229	3.67098e-10	2.30607e-08	12.7048
RARA	-0.142847	7.43748	-6.33198	3.67819e-10	2.30607e-08	12.7029
GSK3A	-0.107113	8.84937	-6.32839	3.76131e-10	2.34448e-08	12.6815
TRPV5	-0.134126	4.44029	-6.32522	3.83612e-10	2.37729e-08	12.6626
MID1	0.201436	7.23863	6.32228	3.90701e-10	2.4073e-08	12.645
ARHGEF4	-0.138769	6.06291	-6.32111	3.93549e-10	2.41099e-08	12.6381
RNF111	0.114369	8.14869	6.31538	4.07833e-10	2.48431e-08	12.6039
MRPL2	-0.155452	7.51036	-6.30429	4.36886e-10	2.64625e-08	12.5378
CCL25	-0.103258	5.54517	-6.29183	4.71974e-10	2.84272e-08	12.4637
GPI	-0.139203	10.1829	-6.28688	4.86681e-10	2.90129e-08	12.4343
LRP5	-0.176045	6.89664	-6.28547	4.90936e-10	2.90129e-08	12.426
NDUFA3	-0.138305	11.2707	-6.28538	4.91203e-10	2.90129e-08	12.4254
SLC25A11	-0.198369	9.27222	-6.28495	4.92524e-10	2.90129e-08	12.4229
C9orf16	-0.20086	8.22347	-6.26406	5.60371e-10	3.28292e-08	12.2991
PPP2R1A	-0.205568	10.3186	-6.25836	5.8043e-10	3.37906e-08	12.2653
GAP43	-0.130292	7.45796	-6.25762	5.83085e-10	3.37906e-08	12.261
UBAP2L	-0.131474	7.93869	-6.23719	6.61188e-10	3.81107e-08	12.1404
ERCC1	-0.119418	8.30665	-6.22759	7.01369e-10	4.02106e-08	12.0838
TACSTD2	0.441706	10.6062	6.22414	7.16366e-10	4.08519e-08	12.0636
NOC4L	-0.107408	7.24618	-6.22212	7.25308e-10	4.1143e-08	12.0517
ERGIC3	-0.110745	9.56613	-6.22041	7.32939e-10	4.1357e-08	12.0416
DPH1	-0.10111	8.76989	-6.21745	7.46343e-10	4.18929e-08	12.0243
CXorf40A	0.0949597	9.22769	6.21451	7.59923e-10	4.2433e-08	12.007
TM2D3	0.125578	9.08143	6.21154	7.73904e-10	4.29897e-08	11.9895
APC2	-0.106192	5.36677	-6.19794	8.41046e-10	4.64786e-08	11.9097
PGLS	-0.126499	8.41013	-6.18106	9.32324e-10	5.11103e-08	11.811
NOC2L	-0.110093	6.82192	-6.1807	9.34393e-10	5.11103e-08	11.8088
GFPT1	0.168258	7.95232	6.17883	9.4508e-10	5.12756e-08	11.7979
C19orf54	-0.139206	7.3231	-6.178	9.49897e-10	5.12756e-08	11.7931
DRD2	-0.125358	4.89985	-6.17767	9.51763e-10	5.12756e-08	11.7912
SLC25A28	-0.102423	8.19935	-6.17503	9.67204e-10	5.1847e-08	11.7758
AAAS	-0.125504	7.55518	-6.17417	9.72309e-10	5.18613e-08	11.7707
TUBB2B	0.261629	8.08019	6.17151	9.88217e-10	5.24489e-08	11.7552
NDRG3	0.14132	8.11679	6.17019	9.9617e-10	5.26106e-08	11.7475
SLC9A6	0.103585	8.13098	6.14449	1.16455e-09	6.12018e-08	11.5978
CNGB3	-0.121598	3.64304	-6.14251	1.1786e-09	6.16379e-08	11.5863
CLN5	0.153608	9.1553	6.13518	1.23219e-09	6.41279e-08	11.5437
ASF1B	-0.136713	4.95192	-6.12816	1.28563e-09	6.65857e-08	11.503
AVPR1B	-0.128915	5.11986	-6.12565	1.30534e-09	6.72815e-08	11.4885
TMED10	0.104442	10.4185	6.12303	1.32617e-09	6.8028e-08	11.4733
BUB3	0.131631	8.82804	6.12224	1.33251e-09	6.8028e-08	11.4687
NPTN	0.117932	10.7276	6.11131	1.42352e-09	7.21704e-08	11.4054
ARMCX2	0.184543	8.59772	6.11089	1.42712e-09	7.21704e-08	11.403
MYOZ3	-0.136827	6.70202	-6.11005	1.43439e-09	7.21976e-08	11.3981
CTCF	0.0876201	8.52789	6.10742	1.45731e-09	7.30084e-08	11.383
METAP1	0.0971591	8.91654	6.10217	1.50421e-09	7.45911e-08	11.3526
CDH8	-0.119007	4.48102	-6.10105	1.51439e-09	7.45911e-08	11.3461
TMEM87A	0.16449	8.44379	6.10097	1.51514e-09	7.45911e-08	11.3457
GADD45GIP1	-0.121658	8.72535	-6.1008	1.51673e-09	7.45911e-08	11.3447
VCY	-0.113978	5.22846	-6.09973	1.52652e-09	7.47299e-08	11.3385
NINJ1	-0.162746	9.41557	-6.09772	1.54509e-09	7.5295e-08	11.3269
TMEM222	-0.143272	8.74693	-6.09363	1.58367e-09	7.68258e-08	11.3033
HMGN4	0.159859	9.7444	6.09129	1.60609e-09	7.75624e-08	11.2898
YIF1A	-0.118271	9.14266	-6.08893	1.62911e-09	7.83213e-08	11.2762
TPCN1	-0.186524	8.83518	-6.0838	1.6801e-09	8.04121e-08	11.2467
DPF2	-0.0951556	8.57368	-6.0752	1.76926e-09	8.43034e-08	11.1972
PPME1	-0.157801	7.39076	-6.06437	1.88807e-09	8.91611e-08	11.1349
CST5	-0.0886548	3.92954	-6.06399	1.8924e-09	8.91611e-08	11.1327
TSSC4	-0.121347	6.8129	-6.06366	1.89616e-09	8.91611e-08	11.1308
POLA2	-0.0907525	6.39634	-6.06075	1.92951e-09	9.03332e-08	11.1141
CD320	-0.14027	7.48901	-6.05831	1.95791e-09	9.12642e-08	11.1001
TTC30A	0.179508	5.5585	6.05642	1.98014e-09	9.19007e-08	11.0893
CTNND2	-0.130526	4.87975	-6.0464	2.10257e-09	9.71622e-08	11.0319
CRX	-0.113323	5.9282	-6.04256	2.15136e-09	9.89903e-08	11.0099
MLF2	-0.201796	10.1098	-6.04171	2.16237e-09	9.90716e-08	11.005
ATP2C1	0.127268	9.71274	6.03889	2.19916e-09	1.00329e-07	10.9889
C1orf61	-0.0983555	5.80667	-6.03405	2.26365e-09	1.02833e-07	10.9612
IGFBP4	-0.218422	10.8615	-6.03239	2.28609e-09	1.03414e-07	10.9517
DDRGK1	-0.106802	8.83922	-6.02988	2.3207e-09	1.04539e-07	10.9374
TRIM36	-0.107463	6.84614	-6.02595	2.37567e-09	1.06567e-07	10.915
TMEM9B	0.205966	9.62491	6.0205	2.45411e-09	1.09627e-07	10.8839
BRD8	0.140872	8.13523	6.01654	2.51265e-09	1.11776e-07	10.8613
GNAO1	-0.123756	6.78946	-6.00821	2.64033e-09	1.16633e-07	10.8138
USP33	0.134794	9.11125	6.00801	2.64359e-09	1.16633e-07	10.8127
FOXM1	-0.13547	5.58962	-6.00613	2.67321e-09	1.17457e-07	10.802
SPIN2A	0.129495	7.31256	5.97369	3.24044e-09	1.41287e-07	10.6178
TMEM168	0.12843	8.2043	5.97361	3.24192e-09	1.41287e-07	10.6174
RBM42	-0.152149	8.30904	-5.97115	3.2895e-09	1.4278e-07	10.6034
GDI2	0.158995	11.1931	5.97034	3.30528e-09	1.42887e-07	10.5989
EFHC1	0.197339	7.17645	5.96037	3.50596e-09	1.50471e-07	10.5425
USP21	-0.134082	7.43199	-5.96023	3.5088e-09	1.50471e-07	10.5417
UTP18	0.110658	9.01121	5.95891	3.53623e-09	1.51044e-07	10.5342
PEMT	-0.183143	8.05323	-5.95071	3.71159e-09	1.56719e-07	10.4879
USP3	0.119863	8.24271	5.95057	3.71461e-09	1.56719e-07	10.4871
POT1	0.171198	7.14116	5.94957	3.73661e-09	1.56719e-07	10.4815
DFFB	-0.114553	6.24905	-5.94951	3.73793e-09	1.56719e-07	10.4812
DDHD2	0.127332	7.98486	5.94932	3.7422e-09	1.56719e-07	10.4801
TRMT12	0.096287	7.09175	5.94621	3.81136e-09	1.58994e-07	10.4625
ZNF225	0.139535	4.5945	5.93703	4.02324e-09	1.67183e-07	10.4108
C18orf25	0.106304	7.47672	5.9313	4.16116e-09	1.72246e-07	10.3785
MANSC1	0.197315	7.43569	5.92585	4.29652e-09	1.77165e-07	10.3479
TNP1	-0.111954	3.56985	-5.92237	4.38518e-09	1.80128e-07	10.3284
SOX10	-0.120789	5.73708	-5.9139	4.60889e-09	1.88595e-07	10.2808
TNPO2	-0.134242	8.09716	-5.91235	4.65084e-09	1.89588e-07	10.2721
GOLPH3L	0.0868971	9.21254	5.90516	4.85087e-09	1.96993e-07	10.2318
HPS5	0.147722	7.66426	5.90403	4.88308e-09	1.97494e-07	10.2255
AIP	-0.123817	8.26332	-5.90344	4.90006e-09	1.97494e-07	10.2222
ADSS	0.197479	8.74724	5.90202	4.94106e-09	1.98401e-07	10.2142
TLE4	0.234567	6.62133	5.89805	5.05712e-09	2.01633e-07	10.192
PPP4R1	0.137405	8.73243	5.89798	5.05915e-09	2.01633e-07	10.1916
ZMYM5	0.130155	5.15537	5.89628	5.10993e-09	2.02265e-07	10.1821
LSM4	-0.12615	9.00203	-5.89618	5.11276e-09	2.02265e-07	10.1815
EIF2B2	-0.121881	9.484	-5.89391	5.18111e-09	2.04216e-07	10.1688
SLC17A7	-0.124609	6.18922	-5.893	5.20892e-09	2.0456e-07	10.1637
GDAP1	0.164846	6.46644	5.88238	5.54216e-09	2.16308e-07	10.1044
MAGEF1	0.106647	8.67368	5.88219	5.54843e-09	2.16308e-07	10.1033
PQLC2	-0.104659	6.6582	-5.88138	5.5747e-09	2.16545e-07	10.0988
S100A14	0.304222	6.7864	5.87759	5.69941e-09	2.19348e-07	10.0777
RARS2	0.0972567	7.89993	5.87739	5.70588e-09	2.19348e-07	10.0766
TUSC3	0.229591	7.96449	5.87732	5.70824e-09	2.19348e-07	10.0762
KCNJ4	-0.111624	5.25812	-5.8763	5.74233e-09	2.1987e-07	10.0705
PARVB	-0.195672	6.28859	-5.87485	5.79103e-09	2.20945e-07	10.0624
CAPZB	-0.145983	9.55217	-5.8727	5.86406e-09	2.22938e-07	10.0504
PTMS	-0.128299	8.25855	-5.86476	6.14192e-09	2.32677e-07	10.0062
RUVBL2	-0.0875371	9.04143	-5.85817	6.38175e-09	2.40911e-07	9.96955
SMUG1	-0.112715	7.45203	-5.85285	6.58254e-09	2.46983e-07	9.93993
RNF114	0.110077	9.43797	5.85269	6.58866e-09	2.46983e-07	9.93904
MMP7	0.592717	11.1178	5.84573	6.8604e-09	2.56273e-07	9.90041
SCYL3	0.123119	6.57318	5.81665	8.11911e-09	3.02239e-07	9.73939
CDKN2AIP	0.165962	5.07929	5.81307	8.28851e-09	3.07478e-07	9.71966
NOP2	-0.129299	6.85402	-5.81017	8.42882e-09	3.11605e-07	9.70361
GPS1	-0.177053	8.42724	-5.80195	8.83797e-09	3.25608e-07	9.65832
SLC35A5	0.106956	8.53313	5.79753	9.06625e-09	3.32636e-07	9.63395
NOP14	-0.0977214	6.37465	-5.79706	9.0908e-09	3.32636e-07	9.63136
SUSD4	-0.146601	6.87145	-5.79475	9.21279e-09	3.35953e-07	9.61863
MIS12	0.122045	7.72838	5.78995	9.47104e-09	3.442e-07	9.59221
GTSE1	-0.141529	4.85616	-5.78892	9.52726e-09	3.45074e-07	9.58655
OXA1L	-0.111246	9.96817	-5.7821	9.90819e-09	3.57662e-07	9.5491
HMGN1	0.118323	11.0299	5.77875	1.01011e-08	3.63401e-07	9.53068
SCGB2A1	0.367798	4.32849	5.76954	1.065e-08	3.81869e-07	9.48012
ZNHIT2	-0.118492	5.74996	-5.76505	1.09275e-08	3.89452e-07	9.45555
GFER	-0.121478	6.56477	-5.76495	1.09342e-08	3.89452e-07	9.45496
CA1	-0.155535	5.6931	-5.76354	1.10228e-08	3.91308e-07	9.44726
KCNIP2	-0.141318	6.22789	-5.76009	1.12426e-08	3.97794e-07	9.42839
ZBED1	-0.110025	8.89794	-5.75697	1.14453e-08	4.03636e-07	9.41132
FBXL4	0.17394	6.907	5.74999	1.19124e-08	4.1873e-07	9.37311
FOXL1	-0.119434	5.83921	-5.74864	1.20046e-08	4.20592e-07	9.36575
NFE2L1	-0.130945	10.4968	-5.74504	1.22545e-08	4.26625e-07	9.34607
VPS53	0.123345	7.41102	5.74501	1.22564e-08	4.26625e-07	9.34593
KIR2DL3	-0.0898199	2.85842	-5.74428	1.23074e-08	4.27015e-07	9.34196
MSX1	-0.129606	5.18888	-5.74077	1.25574e-08	4.34282e-07	9.32275
DCTN1	-0.142049	8.35268	-5.73986	1.26224e-08	4.35127e-07	9.31782
MAP2K3	-0.142626	8.16355	-5.73839	1.27286e-08	4.37381e-07	9.30982
CTSA	-0.235751	11.5857	-5.73727	1.28102e-08	4.38781e-07	9.30371
GNAI3	0.133559	9.12758	5.73164	1.3229e-08	4.50463e-07	9.27299
RAP1B	0.119533	10.5081	5.73156	1.32353e-08	4.50463e-07	9.27253
PAM	0.094365	10.9909	5.72861	1.34594e-08	4.56641e-07	9.2565
KLHDC10	0.215144	7.42938	5.72547	1.37028e-08	4.62294e-07	9.23939
THADA	0.0858288	7.51363	5.72535	1.37123e-08	4.62294e-07	9.23872
NDUFB7	-0.118216	9.00382	-5.71672	1.4403e-08	4.84059e-07	9.1918
GPBP1L1	0.123259	8.6776	5.71501	1.45443e-08	4.87171e-07	9.18248
POLE	-0.101239	6.84531	-5.7145	1.45865e-08	4.87171e-07	9.17971
RYK	0.165179	8.33572	5.71257	1.47474e-08	4.91015e-07	9.16924
CBX5	-0.158629	8.48838	-5.70781	1.51521e-08	5.02929e-07	9.14338
NRG1	-0.154087	6.72422	-5.69893	1.59354e-08	5.27294e-07	9.09526
HIRIP3	-0.0930236	7.27693	-5.6951	1.62856e-08	5.37224e-07	9.07451
ANXA3	0.330338	7.88585	5.68466	1.72786e-08	5.68232e-07	9.01801
KEAP1	-0.102083	8.24139	-5.68248	1.74939e-08	5.71823e-07	9.00618
RYBP	0.115804	8.71814	5.68247	1.74945e-08	5.71823e-07	9.00616
ART3	-0.378112	5.83848	-5.67882	1.78602e-08	5.82003e-07	8.98641
ZNF274	0.134434	7.29006	5.67631	1.81149e-08	5.88514e-07	8.97289
GPATCH2	0.183819	6.7968	5.67129	1.86363e-08	6.03625e-07	8.9458
POLR2C	-0.0871408	9.33986	-5.66509	1.93013e-08	6.23282e-07	8.91234
GALNT3	0.260682	7.18061	5.66423	1.93946e-08	6.24413e-07	8.90774
UQCR11	-0.103432	10.9178	-5.66201	1.96399e-08	6.30418e-07	8.89574
OBP2A	-0.0895603	4.9823	-5.65932	1.99403e-08	6.37986e-07	8.88126
C16orf71	-0.101976	4.3806	-5.65839	2.00452e-08	6.37986e-07	8.87625
ARPC1A	0.132594	9.13831	5.65831	2.00542e-08	6.37986e-07	8.87582
GTF2IRD2B	-0.0867315	7.04019	-5.64953	2.10715e-08	6.68367e-07	8.8286
RAE1	0.117679	7.77894	5.64342	2.18088e-08	6.8971e-07	8.79578
POM121L9P	-0.166331	6.57923	-5.64125	2.20773e-08	6.96149e-07	8.7841
MTG1	-0.106671	8.49453	-5.6387	2.23957e-08	7.04117e-07	8.77044
EFHC2	0.25669	5.41032	5.63811	2.24704e-08	7.04402e-07	8.76726
CLCN3	0.136747	9.13641	5.63742	2.25579e-08	7.05083e-07	8.76355
TINF2	0.108422	8.86032	5.63669	2.2651e-08	7.0591e-07	8.75963
CCDC86	-0.0995398	7.19633	-5.63618	2.27161e-08	7.0591e-07	8.75689
CACNA1F	-0.102823	4.26921	-5.6319	2.32688e-08	7.20997e-07	8.73395
CYC1	-0.133359	10.7376	-5.6213	2.46951e-08	7.62986e-07	8.67719
MDFIC	0.242437	6.31432	5.6167	2.53396e-08	7.8065e-07	8.65261
TAF10	-0.104694	9.59163	-5.61495	2.55905e-08	7.8612e-07	8.64321
MKS1	-0.0966556	6.72366	-5.61149	2.60913e-08	7.99212e-07	8.62473
MAST2	-0.148823	6.29224	-5.60995	2.63166e-08	8.03819e-07	8.61652
SMPD1	-0.1471	8.65807	-5.60164	2.75687e-08	8.39672e-07	8.57218
ZNF408	-0.104813	6.52946	-5.6007	2.77143e-08	8.41715e-07	8.56716
YTHDC1	0.142975	9.26734	5.59687	2.83147e-08	8.5752e-07	8.54672
OCM2	-0.111229	4.2483	-5.5947	2.86602e-08	8.65538e-07	8.53515
TADA2A	0.112211	4.81748	5.59234	2.90402e-08	8.74551e-07	8.52259
DDX50	0.157808	7.76297	5.58974	2.94636e-08	8.84658e-07	8.50878
ZFP36L1	0.157021	10.5963	5.58905	2.95771e-08	8.84658e-07	8.50511
PITX3	-0.137085	5.7606	-5.58877	2.96234e-08	8.84658e-07	8.50362
RAB4A	0.11025	7.26302	5.5855	3.017e-08	8.9848e-07	8.48619
HP1BP3	0.0950901	10.4502	5.58297	3.05978e-08	9.08694e-07	8.47276
WNT6	-0.0877596	5.83993	-5.58181	3.07971e-08	9.12088e-07	8.46657
BCL7B	-0.0990826	8.52127	-5.57464	3.20507e-08	9.46599e-07	8.42852
DYNLRB1	-0.117929	10.8886	-5.57274	3.23918e-08	9.54045e-07	8.41843
C19orf53	-0.107204	9.36957	-5.56459	3.38951e-08	9.95586e-07	8.37517
RAC1	0.180392	10.9983	5.56175	3.44333e-08	1.00863e-06	8.36015
ZNF140	0.1304	7.38494	5.55987	3.47942e-08	1.01643e-06	8.35021
WAC	0.116626	10.2449	5.55381	3.59857e-08	1.04838e-06	8.3181
TIMM50	-0.106889	7.74368	-5.55322	3.6103e-08	1.04895e-06	8.315
YIF1B	-0.0991274	6.71924	-5.5401	3.88271e-08	1.12504e-06	8.24565
MGEA5	0.13694	9.14335	5.53713	3.94712e-08	1.14062e-06	8.22997
IPO9	-0.104699	7.38283	-5.53609	3.96989e-08	1.14412e-06	8.22449
LAGE3	-0.123183	5.80731	-5.53016	4.1022e-08	1.17908e-06	8.19324
SEH1L	0.0978791	7.70509	5.52894	4.12989e-08	1.18386e-06	8.18683
ESRP1	0.284739	6.65037	5.52567	4.2053e-08	1.20227e-06	8.16958
ABI1	0.11802	9.34652	5.52171	4.29814e-08	1.22554e-06	8.14877
ATXN2	-0.112285	7.62595	-5.51972	4.34573e-08	1.23582e-06	8.13827
C12orf49	-0.155748	7.43997	-5.50236	4.78207e-08	1.35631e-06	8.04709
IPP	0.180952	6.11345	5.49937	4.86138e-08	1.37517e-06	8.03142
KCMF1	0.0787153	8.22156	5.49636	4.94243e-08	1.39441e-06	8.01566
SLC39A6	0.19464	8.68597	5.49142	5.07839e-08	1.42901e-06	7.9898
UQCRC1	-0.154855	11.563	-5.48987	5.12182e-08	1.43746e-06	7.98169
GLE1	0.0906712	7.22004	5.48567	5.24143e-08	1.46681e-06	7.9597
SMARCB1	-0.116046	7.71063	-5.48506	5.25887e-08	1.46681e-06	7.95653
SPCS2	0.110496	10.2345	5.48477	5.26743e-08	1.46681e-06	7.95498
OGDH	-0.152215	8.47084	-5.48331	5.30985e-08	1.47479e-06	7.94734
REPIN1	-0.0866175	8.20728	-5.48218	5.34292e-08	1.48014e-06	7.94142
HPRT1	0.123432	9.59886	5.47701	5.49656e-08	1.51756e-06	7.91442
GYPB	-0.229457	6.2816	-5.47668	5.5063e-08	1.51756e-06	7.91273
NLK	0.160875	7.86015	5.46978	5.7185e-08	1.572e-06	7.87671
GATAD1	0.129091	8.88781	5.46729	5.79695e-08	1.58949e-06	7.86373
ARFIP1	0.136351	7.46832	5.46268	5.94495e-08	1.62193e-06	7.83972
TMEM134	-0.0935147	8.18399	-5.46261	5.94713e-08	1.62193e-06	7.83937
CALCOCO1	-0.139751	8.04725	-5.4622	5.96064e-08	1.62193e-06	7.83721
DSCC1	-0.0996444	4.37269	-5.45648	6.15008e-08	1.66924e-06	7.8074
MMP17	-0.119407	5.80505	-5.45546	6.18419e-08	1.67426e-06	7.80214
NOV	0.402825	6.83307	5.45474	6.20882e-08	1.67669e-06	7.79835
SIAH1	0.107568	7.96432	5.45377	6.24163e-08	1.68132e-06	7.79333
MEN1	-0.11415	7.53211	-5.45308	6.26531e-08	1.68347e-06	7.78973
RPS6KA2	-0.136176	7.7448	-5.4508	6.34374e-08	1.69834e-06	7.77788
HS1BP3	-0.116377	7.16473	-5.44992	6.37432e-08	1.69834e-06	7.7733
TLR6	-0.0839362	4.11492	-5.44974	6.38063e-08	1.69834e-06	7.77236
RRP1	-0.0966032	7.09123	-5.44964	6.38401e-08	1.69834e-06	7.77185
SERPINB8	-0.139385	6.53465	-5.4464	6.49762e-08	1.7218e-06	7.75505
ATP10D	0.173118	9.34014	5.44622	6.50434e-08	1.7218e-06	7.75407
CCNG2	0.171166	8.49331	5.44348	6.60224e-08	1.74341e-06	7.73984
CCT4	0.124265	11.2025	5.43976	6.73747e-08	1.77475e-06	7.72053
PIN1	-0.129618	8.54691	-5.43606	6.87441e-08	1.80639e-06	7.70137
YWHAH	0.223453	9.85298	5.434	6.95186e-08	1.82227e-06	7.6907
FEZF2	-0.096101	3.08088	-5.42934	7.13049e-08	1.86454e-06	7.66654
NOTCH2NL	0.225218	6.298	5.42408	7.33725e-08	1.91393e-06	7.63933
ADRA1D	-0.0981954	5.28493	-5.42109	7.45772e-08	1.94064e-06	7.62382
ZNF223	0.118259	6.44046	5.41807	7.58097e-08	1.96793e-06	7.60822
UBQLN2	0.112571	8.98613	5.41115	7.87085e-08	2.03825e-06	7.57249
MEAF6	0.111188	8.61351	5.40715	8.04356e-08	2.07724e-06	7.55183
RNF139	0.103754	8.68819	5.40677	8.06019e-08	2.07724e-06	7.54986
ANKS1A	0.113137	8.59817	5.40577	8.104e-08	2.08352e-06	7.5447
TES	0.226215	8.76511	5.40403	8.18062e-08	2.09819e-06	7.53574
MKRN1	0.0967517	9.35109	5.39818	8.44393e-08	2.16056e-06	7.50559
VPS35	0.116732	9.48979	5.39301	8.6832e-08	2.21373e-06	7.47899
QPCTL	-0.0917448	5.63207	-5.3928	8.69305e-08	2.21373e-06	7.47791
LRFN3	-0.0954643	6.30102	-5.38999	8.82634e-08	2.24235e-06	7.46343
MED27	-0.121882	7.29513	-5.38734	8.95338e-08	2.26874e-06	7.44983
CD200	0.259372	6.75398	5.38695	8.97253e-08	2.26874e-06	7.44779
ERMP1	0.205864	9.48853	5.3839	9.12152e-08	2.29988e-06	7.43212
NSD1	0.140129	7.4286	5.38312	9.15973e-08	2.29988e-06	7.42814
KIR3DX1	-0.105034	3.52988	-5.38312	9.16006e-08	2.29988e-06	7.42811
PROM1	0.475387	9.01597	5.38104	9.26337e-08	2.32039e-06	7.41744
CDH15	-0.121502	5.60942	-5.37445	9.5982e-08	2.39865e-06	7.38364
LAMC2	0.286961	6.73412	5.37328	9.6591e-08	2.40826e-06	7.37763
TIMM8A	-0.0973253	6.05798	-5.36875	9.89802e-08	2.4621e-06	7.35437
FAM188A	0.0988282	8.03451	5.36655	1.00159e-07	2.48567e-06	7.34311
SPATA6	0.150215	6.17549	5.36361	1.01756e-07	2.51946e-06	7.32806
LIM2	-0.0975476	4.6684	-5.35876	1.04444e-07	2.57808e-06	7.30325
HGSNAT	0.109263	6.91029	5.35847	1.04605e-07	2.57808e-06	7.30179
WDR74	-0.0887987	7.10227	-5.3574	1.05212e-07	2.58711e-06	7.29628
TRA2A	0.203112	9.11047	5.34674	1.11412e-07	2.73328e-06	7.24181
LUC7L	0.133125	8.13137	5.34211	1.14214e-07	2.79152e-06	7.21818
ZNF91	-0.285177	9.0272	-5.34158	1.14535e-07	2.79152e-06	7.2155
CES3	-0.153622	5.59183	-5.34153	1.14567e-07	2.79152e-06	7.21524
KIF17	-0.0972248	5.76092	-5.33841	1.16499e-07	2.82971e-06	7.19933
CSNK2B	-0.0739398	9.68922	-5.33812	1.1668e-07	2.82971e-06	7.19785
CTRC	-0.0979858	4.67275	-5.33773	1.16926e-07	2.82971e-06	7.19585
ACBD4	-0.127047	7.40446	-5.33298	1.19934e-07	2.89597e-06	7.17169
TPM4	0.248422	8.81074	5.33163	1.20808e-07	2.91051e-06	7.16479
ZNF227	0.130366	6.9172	5.3311	1.21148e-07	2.91216e-06	7.16211
RCBTB2	0.181007	7.876	5.32993	1.2191e-07	2.92394e-06	7.15614
SCRN1	0.158281	9.01952	5.32772	1.23361e-07	2.95212e-06	7.1449
ZNF576	-0.0998878	6.53002	-5.32454	1.25478e-07	2.99609e-06	7.12871
VPS52	-0.100124	8.84012	-5.32333	1.26291e-07	3.00882e-06	7.12256
PRPSAP1	0.0916951	8.57677	5.31709	1.30575e-07	3.10397e-06	7.09084
STAU2	0.123876	7.61339	5.31657	1.30936e-07	3.10567e-06	7.08822
ANGEL2	0.110965	7.21019	5.31527	1.31844e-07	3.12031e-06	7.08164
PNKP	-0.108417	7.35286	-5.31403	1.32724e-07	3.13421e-06	7.07532
AIDA	0.14485	9.36755	5.3065	1.38158e-07	3.25537e-06	7.03716
MRAS	0.166658	7.5563	5.3024	1.41211e-07	3.32e-06	7.01638
TOLLIP	-0.133458	8.17671	-5.30179	1.41674e-07	3.32361e-06	7.01326
CCDC130	-0.0922275	7.66799	-5.30045	1.42684e-07	3.33999e-06	7.00651
SOX4	0.265044	9.31509	5.2964	1.45792e-07	3.40531e-06	6.98602
TEX13A	-0.102623	3.97966	-5.29282	1.48603e-07	3.45659e-06	6.96786
HNRNPR	0.143033	10.2049	5.29278	1.48632e-07	3.45659e-06	6.96768
CTNNA1	0.120566	10.8159	5.29127	1.49829e-07	3.47688e-06	6.96005
HBD	-0.180498	4.98876	-5.28838	1.52149e-07	3.52309e-06	6.94544
KRT33B	-0.0901962	5.34661	-5.28615	1.53958e-07	3.55729e-06	6.93421
IPPK	0.086285	6.25571	5.28495	1.54943e-07	3.57234e-06	6.92815
MRPL24	-0.0912808	9.74108	-5.28213	1.57281e-07	3.61847e-06	6.91391
HLCS	0.0864909	6.74286	5.28068	1.58496e-07	3.63862e-06	6.90659
CNOT3	-0.165063	6.105	-5.27883	1.6006e-07	3.66667e-06	6.89726
CAMK1	-0.112152	6.81169	-5.27612	1.62377e-07	3.71183e-06	6.88359
SMG5	-0.0986919	7.03141	-5.27475	1.63561e-07	3.73093e-06	6.87669
HTR5A	-0.0908437	3.83516	-5.2735	1.64649e-07	3.74777e-06	6.87039
GABRP	0.387554	6.07102	5.27306	1.6504e-07	3.74872e-06	6.86813
S100PBP	0.123023	7.68484	5.27119	1.6668e-07	3.77796e-06	6.85873
STAM	0.128164	7.9985	5.26884	1.68769e-07	3.81725e-06	6.84689
ZNF124	0.178211	6.22203	5.26798	1.69539e-07	3.82659e-06	6.84257
KLK2	-0.085115	6.08942	-5.2661	1.71236e-07	3.85676e-06	6.8331
TPSG1	-0.0916418	6.02673	-5.2627	1.74342e-07	3.91848e-06	6.81602
HRAS	-0.102995	8.00032	-5.25729	1.79404e-07	4.02382e-06	6.78882
NOLC1	0.125452	8.61422	5.25467	1.81903e-07	4.07137e-06	6.77567
ACP2	-0.121033	8.43545	-5.25357	1.82965e-07	4.0866e-06	6.77014
MFAP1	0.0845771	8.85355	5.25205	1.84444e-07	4.11108e-06	6.76248
SMYD3	0.133246	7.21991	5.24967	1.86773e-07	4.15434e-06	6.75056
SLC35E1	0.121437	7.78212	5.24654	1.89886e-07	4.20809e-06	6.73485
G6PD	-0.12193	6.989	-5.24645	1.89975e-07	4.20809e-06	6.73441
APBB2	-0.129228	8.60491	-5.24593	1.905e-07	4.21102e-06	6.73179
PQLC3	0.133841	8.57366	5.24267	1.93804e-07	4.27106e-06	6.71545
CALCOCO2	0.115317	8.94175	5.24246	1.94013e-07	4.27106e-06	6.71442
PHKG2	-0.105372	8.23476	-5.23858	1.9803e-07	4.35057e-06	6.69495
DHPS	-0.107027	8.50611	-5.23787	1.9877e-07	4.3579e-06	6.6914
GGNBP2	0.103786	8.81639	5.23703	1.99648e-07	4.36821e-06	6.68722
GRAMD3	0.158448	8.44366	5.23498	2.01816e-07	4.40666e-06	6.67695
GLS2	-0.138197	5.62636	-5.23331	2.03596e-07	4.43649e-06	6.66861
KLHL12	0.0853117	8.60257	5.23238	2.04597e-07	4.44926e-06	6.66395
RIC8B	0.080025	7.34971	5.22841	2.0892e-07	4.53407e-06	6.64409
HAPLN2	-0.110227	5.39954	-5.22772	2.09682e-07	4.54053e-06	6.64063
ARHGDIG	-0.0819713	6.0183	-5.22737	2.10065e-07	4.54053e-06	6.6389
DAGLA	-0.10422	5.25234	-5.22575	2.11865e-07	4.57023e-06	6.63079
MYL12B	0.0781898	11.9687	5.22421	2.13582e-07	4.59802e-06	6.62312
C19orf60	-0.109576	8.43939	-5.22162	2.16511e-07	4.65173e-06	6.61018
ACHE	-0.0994829	5.22169	-5.21905	2.19451e-07	4.70023e-06	6.59737
PIAS3	-0.122566	7.54415	-5.21889	2.19645e-07	4.70023e-06	6.59653
IER3	0.239275	8.92416	5.2179	2.20786e-07	4.71492e-06	6.59161
RHOT1	0.0794396	8.6442	5.21753	2.21211e-07	4.71492e-06	6.58978
RTEL1	-0.122147	6.30998	-5.21597	2.23035e-07	4.74436e-06	6.58198
RBM22	0.118273	8.35415	5.2149	2.24285e-07	4.76149e-06	6.57667
TMEM104	-0.0985474	6.27547	-5.21349	2.2596e-07	4.78758e-06	6.56961
MCAT	-0.154858	8.2406	-5.21252	2.27105e-07	4.80236e-06	6.5648
DAPK2	-0.100083	5.9897	-5.2121	2.27615e-07	4.80365e-06	6.56267
HSD17B4	0.084721	9.93641	5.20918	2.31123e-07	4.8681e-06	6.54815
SLBP	0.136639	8.69677	5.20851	2.3194e-07	4.87005e-06	6.54479
RNF17	-0.107661	3.85802	-5.20836	2.32123e-07	4.87005e-06	6.54404
TBC1D22A	-0.0871611	7.32862	-5.20534	2.35826e-07	4.93108e-06	6.52901
FGF4	-0.103603	5.37027	-5.20522	2.35968e-07	4.93108e-06	6.52844
VAC14	-0.0922041	7.25232	-5.20486	2.36412e-07	4.93108e-06	6.52665
PGP	-0.105519	8.04139	-5.20126	2.40912e-07	5.01518e-06	6.50875
UHRF1BP1L	-0.134782	6.44474	-5.19915	2.43588e-07	5.06106e-06	6.49826
NMT1	0.101355	8.40376	5.19485	2.49135e-07	5.16629e-06	6.47687
EIF3G	-0.110316	9.28179	-5.19322	2.51275e-07	5.20062e-06	6.46875
IFRD2	-0.12434	8.17248	-5.19141	2.53656e-07	5.23977e-06	6.45979
SCAMP3	-0.0983136	8.93842	-5.18932	2.56447e-07	5.28725e-06	6.4494
RWDD2A	0.126004	6.54081	5.18724	2.5925e-07	5.33478e-06	6.43908
UBE4A	0.0767589	9.59532	5.18623	2.60624e-07	5.34414e-06	6.43406
MED17	0.100944	7.76229	5.18617	2.60702e-07	5.34414e-06	6.43377
PRKD1	0.153143	8.03363	5.18481	2.62566e-07	5.37207e-06	6.42701
MOSPD3	-0.110861	6.53692	-5.18415	2.63472e-07	5.38035e-06	6.42374
SLC1A5	-0.1697	8.39323	-5.1835	2.64362e-07	5.38827e-06	6.42054
ALDH18A1	0.134351	8.84313	5.1821	2.66294e-07	5.41715e-06	6.41362
ELOVL6	0.177556	5.48639	5.18175	2.6679e-07	5.41715e-06	6.41186
SPIN1	0.116877	10.5326	5.17425	2.77429e-07	5.62253e-06	6.37473
PFKL	-0.129792	8.48278	-5.17304	2.79184e-07	5.64742e-06	6.36874
IL1RAPL1	-0.0955305	4.33322	-5.17146	2.81489e-07	5.6728e-06	6.36093
NUBP2	-0.0886188	7.86775	-5.17133	2.8169e-07	5.6728e-06	6.36026
PRRX2	-0.107731	6.70725	-5.17083	2.82422e-07	5.6728e-06	6.35779
H2AFY	0.155503	9.92088	5.17074	2.82555e-07	5.6728e-06	6.35735
PREPL	0.157055	9.0869	5.16873	2.85519e-07	5.72159e-06	6.34744
DHRS11	-0.158018	7.83226	-5.16519	2.90835e-07	5.80869e-06	6.32993
TMOD1	0.0993537	7.81318	5.16512	2.90949e-07	5.80869e-06	6.32955
ZNF419	0.1034	6.78644	5.16375	2.9302e-07	5.83916e-06	6.32282
NUFIP1	-0.0940337	7.16183	-5.16292	2.94291e-07	5.8536e-06	6.31871
GUK1	-0.0943802	9.91592	-5.1623	2.95249e-07	5.86178e-06	6.31563
SRP72	0.0948476	9.305	5.15675	3.0389e-07	6.0222e-06	6.28824
RUNDC3A	-0.0706449	6.17872	-5.15513	3.06451e-07	6.06174e-06	6.28028
ANKRD6	0.134185	6.93475	5.15461	3.0728e-07	6.06693e-06	6.27771
PDK2	-0.20755	8.37222	-5.15297	3.09915e-07	6.10706e-06	6.26961
GMEB2	0.0939813	6.99479	5.15264	3.10451e-07	6.10706e-06	6.26797
PTGES3	0.0938579	11.3459	5.15191	3.11625e-07	6.11892e-06	6.26438
TCEA1	0.0719099	9.33878	5.15124	3.12717e-07	6.12915e-06	6.26106
VPS72	-0.112048	8.18344	-5.15022	3.14364e-07	6.13389e-06	6.25608
PRKCG	-0.124151	5.38854	-5.15021	3.14393e-07	6.13389e-06	6.25599
F11R	0.153406	9.66486	5.15003	3.14676e-07	6.13389e-06	6.25514
KRT19	0.289162	9.16576	5.14617	3.21054e-07	6.24685e-06	6.23609
AGR2	0.337585	7.38862	5.14252	3.27187e-07	6.35465e-06	6.21813
HSF4	-0.125177	6.60811	-5.13966	3.32071e-07	6.43785e-06	6.20407
SEPW1	-0.163247	9.61257	-5.13756	3.35699e-07	6.49643e-06	6.19376
IFNA4	-0.112443	3.68176	-5.13586	3.38675e-07	6.53176e-06	6.18538
PEX16	-0.111042	7.43535	-5.13582	3.38743e-07	6.53176e-06	6.18519
TTBK2	0.144217	6.09603	5.13459	3.40898e-07	6.56152e-06	6.17917
NXPH3	-0.0984524	5.2929	-5.13258	3.44481e-07	6.61126e-06	6.16925
UFSP2	0.10103	8.30968	5.13244	3.44715e-07	6.61126e-06	6.16861
NEIL3	-0.100954	5.54282	-5.12989	3.49302e-07	6.68727e-06	6.15606
TSPAN13	0.22718	7.72951	5.12954	3.49928e-07	6.6873e-06	6.15437
CRY1	0.144676	8.08598	5.12898	3.50954e-07	6.69497e-06	6.15159
COPB1	0.0880988	9.81491	5.1283	3.52176e-07	6.70636e-06	6.14829
HIST1H2BN	-0.121265	4.91874	-5.12582	3.56733e-07	6.78109e-06	6.13609
DDX49	-0.0835447	7.73076	-5.12432	3.59505e-07	6.82168e-06	6.12875
MOCS1	-0.181666	7.51079	-5.12324	3.61511e-07	6.84677e-06	6.12346
ATP6V0B	-0.128955	10.7372	-5.12293	3.62104e-07	6.84677e-06	6.12191
TLX2	-0.0959604	4.66948	-5.12197	3.6389e-07	6.86843e-06	6.11724
TBC1D9	0.153186	8.83438	5.12007	3.6748e-07	6.91841e-06	6.10793
EFNB2	0.163485	8.02909	5.11989	3.67829e-07	6.91841e-06	6.10703
HIC1	-0.123792	6.22746	-5.11764	3.72134e-07	6.98712e-06	6.09599
TP53AIP1	-0.0916602	5.33792	-5.11502	3.7719e-07	7.06967e-06	6.08318
PARN	0.0765752	8.38716	5.11408	3.7902e-07	7.09157e-06	6.07859
C21orf59	0.0932519	8.69118	5.11238	3.82363e-07	7.14167e-06	6.07026
RAB14	0.162198	9.44175	5.11066	3.85782e-07	7.19298e-06	6.06181
SERINC5	-0.149197	7.65795	-5.10637	3.94401e-07	7.34092e-06	6.04085
ERLIN1	0.107223	8.69364	5.10453	3.98144e-07	7.39774e-06	6.03189
SSSCA1	-0.0979582	8.23503	-5.1033	4.00679e-07	7.43197e-06	6.02587
SEMA3E	-0.121072	3.95973	-5.10257	4.02203e-07	7.44735e-06	6.02227
SPAG16	0.136714	7.91057	5.10169	4.04028e-07	7.46825e-06	6.01798
ZNF747	-0.100527	7.28638	-5.09811	4.11525e-07	7.59373e-06	6.00054
INTS7	0.128069	6.06952	5.08367	4.43231e-07	8.16473e-06	5.93014
CHMP6	-0.10778	7.03687	-5.08149	4.48211e-07	8.24232e-06	5.91954
C10orf88	0.120543	6.12051	5.08083	4.49734e-07	8.25617e-06	5.91633
FGF23	-0.0804308	4.77069	-5.07936	4.53136e-07	8.3044e-06	5.90918
C16orf62	-0.060533	8.03041	-5.07729	4.57979e-07	8.37883e-06	5.8991
CYP1B1	0.259053	9.79341	5.0769	4.5888e-07	8.38101e-06	5.89724
UQCRQ	-0.0890446	11.8258	-5.07432	4.65003e-07	8.47839e-06	5.88467
MXD3	-0.0823793	6.46368	-5.07368	4.66524e-07	8.49169e-06	5.88157
IFNA21	-0.124152	3.74145	-5.07252	4.69314e-07	8.52799e-06	5.87592
INPP1	0.113169	8.02233	5.07155	4.71638e-07	8.55572e-06	5.87123
FYN	-0.147783	8.73081	-5.07052	4.74131e-07	8.58641e-06	5.86623
RABGGTA	-0.0952813	7.53439	-5.06994	4.75557e-07	8.59771e-06	5.86339
TSNAXIP1	-0.112218	4.66961	-5.06721	4.82229e-07	8.69182e-06	5.85017
CDA	-0.164616	6.17808	-5.06705	4.82625e-07	8.69182e-06	5.8494
TSPAN5	0.196548	6.08695	5.06682	4.83194e-07	8.69182e-06	5.84828
TAF7	0.0927438	9.72306	5.06641	4.84214e-07	8.69557e-06	5.84628
TSC2	-0.10552	7.45582	-5.06558	4.86266e-07	8.71783e-06	5.84227
SPATS2	0.176611	7.46148	5.06414	4.89877e-07	8.7679e-06	5.83526
RNF39	-0.112874	5.57217	-5.06352	4.91416e-07	8.77714e-06	5.83228
LIPG	0.282078	4.81606	5.06328	4.92031e-07	8.77714e-06	5.8311
C1GALT1C1	0.137901	7.80811	5.05476	5.13921e-07	9.15241e-06	5.78983
AMD1	0.114134	9.55059	5.05209	5.20973e-07	9.25908e-06	5.77691
VPS37C	0.0841276	8.74166	5.05184	5.21638e-07	9.25908e-06	5.7757
ZNHIT1	-0.105781	9.97412	-5.05073	5.24606e-07	9.29522e-06	5.77032
POLR2B	0.0825422	9.8563	5.0504	5.25496e-07	9.29522e-06	5.76871
CDH1	0.245749	9.2952	5.04995	5.26693e-07	9.29522e-06	5.76656
MAP3K1	0.203396	9.03777	5.04979	5.27142e-07	9.29522e-06	5.76575
ANKRD10	0.160173	9.03234	5.0471	5.34415e-07	9.40799e-06	5.75276
LTA4H	0.0920479	9.66021	5.04447	5.4163e-07	9.51937e-06	5.74005
FAAH	-0.17538	7.87288	-5.04247	5.4718e-07	9.595e-06	5.73039
TPSD1	-0.111051	4.68598	-5.04176	5.49168e-07	9.595e-06	5.72695
PCBD1	-0.213802	10.0785	-5.04175	5.49196e-07	9.595e-06	5.7269
ATP5D	-0.10952	10.2285	-5.04163	5.49513e-07	9.595e-06	5.72635
CP	0.281184	5.82094	5.03944	5.55672e-07	9.68677e-06	5.71579
BSG	-0.155016	9.83502	-5.03604	5.65376e-07	9.83992e-06	5.69938
GDF2	-0.0959638	4.10284	-5.03305	5.74058e-07	9.96501e-06	5.68493
ZNF440	-0.177716	7.87495	-5.03284	5.74666e-07	9.96501e-06	5.68393
ISOC2	-0.200392	9.39688	-5.03261	5.75351e-07	9.96501e-06	5.6828
PDGFB	-0.0934254	7.59593	-5.03121	5.79451e-07	1.00198e-05	5.67607
FGF5	-0.183073	4.42185	-5.02986	5.83432e-07	1.00724e-05	5.66958
ZIC1	-0.112177	3.77787	-5.02876	5.86706e-07	1.01127e-05	5.66428
ATP5J2	-0.0880564	10.3442	-5.02251	6.05636e-07	1.04086e-05	5.63419
GJD2	-0.0960533	4.63483	-5.02245	6.05817e-07	1.04086e-05	5.6339
ACTR5	0.0906636	6.80941	5.02178	6.079e-07	1.04277e-05	5.63065
SLC25A23	-0.148008	7.66028	-5.02088	6.10667e-07	1.04584e-05	5.62635
SLC35A1	0.0817019	9.05886	5.02033	6.12371e-07	1.04709e-05	5.62371
FOXA2	-0.0980937	4.71228	-5.01785	6.20148e-07	1.0587e-05	5.61175
ADO	0.0720572	8.32634	5.01662	6.24014e-07	1.0636e-05	5.60586
CENPN	-0.166123	6.7084	-5.0156	6.27243e-07	1.06741e-05	5.60097
EEF1A1	0.0940916	12.8822	5.0152	6.28528e-07	1.0679e-05	5.59903
HECTD3	-0.108419	8.17068	-5.01255	6.37026e-07	1.07885e-05	5.58631
PMF1	-0.131598	8.21659	-5.01251	6.37156e-07	1.07885e-05	5.58611
TARDBP	0.100168	9.04149	5.01225	6.37994e-07	1.07885e-05	5.58487
RNF123	-0.136485	7.34916	-5.01005	6.45149e-07	1.08924e-05	5.5743
CTAGE5	-0.183675	8.57922	-5.00974	6.46181e-07	1.08926e-05	5.57279
SART1	-0.117804	7.40629	-5.0054	6.60519e-07	1.11168e-05	5.55199
PITPNB	0.0910744	8.73153	5.00474	6.62738e-07	1.11367e-05	5.54882
CDK13	0.115664	6.95482	5.00166	6.73144e-07	1.12939e-05	5.53406
NOMO1	-0.0763776	10.4633	-4.99811	6.85348e-07	1.14807e-05	5.51704
PLOD1	-0.160627	8.90714	-4.996	6.92676e-07	1.1573e-05	5.50696
INHA	-0.120284	5.21658	-4.99563	6.93999e-07	1.1573e-05	5.50515
GAS2	-0.188032	5.73634	-4.9956	6.94102e-07	1.1573e-05	5.50501
GOLGA4	-0.164284	8.83429	-4.99504	6.96063e-07	1.15877e-05	5.50234
TMEM135	0.16814	7.88782	4.99407	6.99488e-07	1.16267e-05	5.49769
PTPRK	0.107809	9.15602	4.99281	7.03933e-07	1.16825e-05	5.49169
SLCO1A2	-0.0729257	3.848	-4.99215	7.06285e-07	1.17034e-05	5.48853
UROS	-0.116863	8.87939	-4.99151	7.08567e-07	1.17231e-05	5.48547
UGCG	0.246026	9.17547	4.99058	7.11911e-07	1.17461e-05	5.48101
ATXN7	0.124245	8.23978	4.99044	7.12416e-07	1.17461e-05	5.48034
DUS1L	-0.0988414	8.64977	-4.98995	7.14172e-07	1.17461e-05	5.47801
MAPK12	-0.183365	7.05458	-4.98938	7.16258e-07	1.17461e-05	5.47525
ANKLE2	0.13035	7.63799	4.98933	7.16416e-07	1.17461e-05	5.47504
CNOT6	0.132263	7.39785	4.9893	7.16531e-07	1.17461e-05	5.47489
TLL2	-0.107049	4.03065	-4.98894	7.17845e-07	1.17496e-05	5.47315
FSCN3	-0.0923385	5.10663	-4.98768	7.22411e-07	1.18063e-05	5.46715
HOXB9	0.191335	7.29167	4.98492	7.32537e-07	1.19402e-05	5.45396
TULP1	-0.0957383	5.25953	-4.98433	7.34721e-07	1.19402e-05	5.45114
ZNF573	0.106674	7.42883	4.98432	7.3475e-07	1.19402e-05	5.45111
ABCD1	-0.0941585	6.4218	-4.98424	7.35053e-07	1.19402e-05	5.45071
RPS6KB2	-0.117995	7.04815	-4.97807	7.5826e-07	1.22985e-05	5.42128
SLC25A40	0.120593	7.68393	4.97386	7.74538e-07	1.25435e-05	5.40116
LIN37	-0.0972844	7.07846	-4.96887	7.94232e-07	1.28431e-05	5.37738
ZFYVE21	0.173839	8.043	4.96818	7.96973e-07	1.2868e-05	5.37412
ARHGAP26	0.143246	7.55607	4.96769	7.98947e-07	1.28805e-05	5.37178
TSN	0.0928519	8.51643	4.96657	8.0345e-07	1.292e-05	5.36646
CCDC94	-0.0897796	6.93643	-4.96648	8.03807e-07	1.292e-05	5.36603
CSGALNACT1	0.197052	7.5129	4.96612	8.05295e-07	1.29245e-05	5.36428
MBD4	0.130316	8.64737	4.96383	8.14592e-07	1.30542e-05	5.35341
FOXO4	-0.0981605	7.70312	-4.96275	8.19033e-07	1.31057e-05	5.34827
PIP5K1A	-0.121218	7.4308	-4.95846	8.36857e-07	1.3371e-05	5.32788
REEP2	-0.134253	7.13378	-4.95797	8.38934e-07	1.33842e-05	5.32553
PDE5A	0.19393	7.02698	4.95693	8.43338e-07	1.34345e-05	5.32058
ZBTB7B	-0.0848116	7.44727	-4.95497	8.51638e-07	1.35466e-05	5.31131
ACTR10	0.0848725	9.65935	4.95227	8.63263e-07	1.37112e-05	5.29847
TNN	-0.108107	4.36314	-4.95146	8.66804e-07	1.3747e-05	5.29459
ACO2	-0.19437	9.57463	-4.95108	8.6843e-07	1.37525e-05	5.29282
DGAT1	-0.0989628	7.87612	-4.95033	8.71728e-07	1.37844e-05	5.28923
RNGTT	0.119527	5.94354	4.94888	8.78062e-07	1.38641e-05	5.28238
DPP8	0.080777	9.37195	4.94475	8.96444e-07	1.41259e-05	5.26276
PJA1	0.118187	8.32991	4.94456	8.97281e-07	1.41259e-05	5.26188
ASNS	0.210706	7.7136	4.94425	8.98654e-07	1.41268e-05	5.26043
WDR41	0.119928	7.846	4.94313	9.03721e-07	1.41805e-05	5.25511
HRH3	-0.116532	6.12526	-4.94291	9.04715e-07	1.41805e-05	5.25407
CIITA	-0.172728	6.57596	-4.94222	9.07862e-07	1.4209e-05	5.25078
MYCBP	0.129459	7.9367	4.94075	9.14561e-07	1.4293e-05	5.24382
ZNF131	0.126904	6.26375	4.93928	9.21325e-07	1.43778e-05	5.23685
ZBTB22	-0.109813	6.05111	-4.93881	9.23454e-07	1.439e-05	5.23466
NFYA	0.117088	6.43439	4.9373	9.30467e-07	1.44783e-05	5.2275
SEMA6C	-0.126783	7.8651	-4.93257	9.52747e-07	1.48035e-05	5.20511
RB1CC1	-0.166929	8.94135	-4.92912	9.69304e-07	1.50389e-05	5.1888
TPK1	0.165283	6.50933	4.92762	9.76574e-07	1.50884e-05	5.18173
INPP5K	-0.0822506	7.17508	-4.9276	9.76698e-07	1.50884e-05	5.18161
CXorf56	0.148585	4.72953	4.92759	9.76714e-07	1.50884e-05	5.18159
LAPTM4B	0.142953	10.4866	4.92223	1.00323e-06	1.54758e-05	5.15624
CGRRF1	-0.130822	7.55809	-4.92068	1.01101e-06	1.55733e-05	5.14894
AURKB	-0.113823	5.53782	-4.91712	1.02909e-06	1.58253e-05	5.13216
NAP1L3	0.180578	5.26514	4.91688	1.03032e-06	1.58253e-05	5.13103
ABCG4	-0.105354	5.08462	-4.91537	1.03811e-06	1.59158e-05	5.1239
MEFV	-0.10973	4.92025	-4.91516	1.03918e-06	1.59158e-05	5.12292
MTMR1	0.107871	8.20061	4.91197	1.05583e-06	1.61225e-05	5.10788
CSTF1	0.1043	7.25574	4.91197	1.05586e-06	1.61225e-05	5.10786
TUBA1A	0.252101	10.4767	4.91171	1.05719e-06	1.61225e-05	5.10667
NDUFS8	-0.0996573	10.2536	-4.91118	1.06e-06	1.61424e-05	5.10416
CRELD1	-0.0970409	6.82498	-4.90851	1.07417e-06	1.6335e-05	5.09159
TOP3A	-0.0743054	5.70274	-4.90518	1.09214e-06	1.65848e-05	5.07589
CYP4F8	-0.0768892	6.37392	-4.90416	1.09768e-06	1.66452e-05	5.07111
GABPB1	0.108627	6.86606	4.90337	1.10197e-06	1.66687e-05	5.06742
DHX34	-0.0941366	5.82445	-4.90331	1.10233e-06	1.66687e-05	5.0671
HIST1H1A	-0.0888655	3.55439	-4.9011	1.11448e-06	1.68123e-05	5.05673
UTP6	0.128334	8.7196	4.90102	1.11496e-06	1.68123e-05	5.05633
KCNA10	-0.0946163	3.89172	-4.90017	1.11965e-06	1.68592e-05	5.05236
IDH2	-0.181714	9.78426	-4.89928	1.1246e-06	1.68986e-05	5.04819
RPRD1A	0.110518	7.33407	4.89914	1.12542e-06	1.68986e-05	5.0475
LTF	0.719019	8.98301	4.89832	1.12998e-06	1.69398e-05	5.04367
PRB3	-0.105298	4.53074	-4.89808	1.13132e-06	1.69398e-05	5.04255
MPV17	-0.114061	9.56158	-4.89671	1.13908e-06	1.70321e-05	5.03609
PROL1	-0.109118	3.75589	-4.89535	1.14679e-06	1.71236e-05	5.0297
PREB	-0.0960901	7.63135	-4.89482	1.14983e-06	1.71451e-05	5.0272
FGF17	-0.101782	5.01875	-4.89182	1.16704e-06	1.73775e-05	5.01314
DHX15	0.128098	10.1623	4.88616	1.20026e-06	1.78475e-05	4.98659
MRPL28	-0.0884303	9.94064	-4.8823	1.22346e-06	1.81672e-05	4.96849
ACTN1	0.237978	9.23063	4.88185	1.22619e-06	1.81826e-05	4.96638
FAM186A	-0.12531	5.12834	-4.87747	1.25306e-06	1.85553e-05	4.94588
RAB2A	0.0835039	9.7598	4.87646	1.2593e-06	1.8622e-05	4.94118
ABL1	0.100121	9.16821	4.87465	1.27067e-06	1.87642e-05	4.93268
CD59	0.10279	11.5214	4.87046	1.29722e-06	1.91299e-05	4.91313
CEACAM4	-0.0773819	6.72926	-4.86888	1.30743e-06	1.92368e-05	4.90571
DYRK1A	0.0939584	8.67075	4.86878	1.30805e-06	1.92368e-05	4.90526
CHAC1	-0.131231	5.6168	-4.86691	1.3202e-06	1.93888e-05	4.89652
FLT4	-0.0756187	6.6913	-4.86644	1.32328e-06	1.9398e-05	4.89431
TMEM156	0.244063	3.49192	4.86626	1.32444e-06	1.9398e-05	4.89348
ANXA7	0.0785265	10.678	4.86594	1.3265e-06	1.94017e-05	4.89202
PSEN1	0.117737	8.59629	4.8647	1.33469e-06	1.94949e-05	4.88619
ANKRA2	0.123495	7.36189	4.86128	1.35741e-06	1.97998e-05	4.87023
ALPI	-0.105731	5.41081	-4.86087	1.36014e-06	1.98125e-05	4.86834
VTCN1	0.311954	7.65143	4.85986	1.3669e-06	1.98596e-05	4.86365
MAFG	-0.0840248	8.52604	-4.85984	1.36707e-06	1.98596e-05	4.86353
STT3A	0.104494	9.32398	4.85774	1.38132e-06	2.00394e-05	4.85373
HMGB1	0.106723	10.7484	4.85685	1.38738e-06	2.00843e-05	4.84959
HNRNPM	-0.15825	12.2118	-4.85654	1.3895e-06	2.00843e-05	4.84814
MUL1	-0.0833979	8.31286	-4.85646	1.39003e-06	2.00843e-05	4.84778
DNAJB6	0.114172	9.06922	4.85509	1.39943e-06	2.01929e-05	4.84141
CRYGD	-0.0770267	4.6921	-4.85451	1.40345e-06	2.02236e-05	4.8387
COIL	0.111637	6.87487	4.85364	1.40951e-06	2.02746e-05	4.83463
GPX5	-0.125439	4.49857	-4.85345	1.41077e-06	2.02746e-05	4.83378
CYP2R1	0.112261	6.14425	4.85243	1.41793e-06	2.03372e-05	4.829
TIMM17B	-0.0913116	8.58258	-4.8522	1.41951e-06	2.03372e-05	4.82794
TBX4	-0.0910521	3.80341	-4.85201	1.42081e-06	2.03372e-05	4.82708
TLN1	-0.117416	7.90282	-4.85148	1.42456e-06	2.03636e-05	4.82458
LPAR2	0.126984	6.38242	4.84738	1.45363e-06	2.07514e-05	4.80549
MTF2	0.116378	7.79248	4.84394	1.4784e-06	2.10771e-05	4.78951
MAPK9	0.0908578	7.49041	4.84018	1.50596e-06	2.14415e-05	4.77206
EDIL3	0.290198	7.1792	4.83931	1.51242e-06	2.14841e-05	4.76801
C12orf10	-0.111689	8.10267	-4.83924	1.51297e-06	2.14841e-05	4.76767
BTNL8	-0.100461	4.40622	-4.83607	1.53674e-06	2.17928e-05	4.75293
ILF2	0.10247	10.4213	4.83495	1.54519e-06	2.18837e-05	4.74775
P2RX2	-0.0886402	5.12025	-4.83283	1.56138e-06	2.20839e-05	4.7379
XAB2	-0.11505	6.65986	-4.82653	1.61031e-06	2.27459e-05	4.70874
IFI16	0.327172	8.64497	4.82619	1.613e-06	2.27539e-05	4.70716
BRSK2	-0.0968961	5.32801	-4.82305	1.63801e-06	2.30763e-05	4.69262
PPP1R13L	-0.117158	6.6496	-4.82272	1.6407e-06	2.30838e-05	4.69107
STX6	0.0952035	7.57901	4.82019	1.66115e-06	2.3341e-05	4.67936
TAX1BP3	0.157434	9.87577	4.81903	1.67061e-06	2.34432e-05	4.67399
TPRA1	-0.116992	6.46846	-4.81866	1.67365e-06	2.34552e-05	4.67228
OR7C2	-0.0798251	3.75615	-4.81701	1.68719e-06	2.36141e-05	4.66466
KCNQ1	0.135712	7.97957	4.81631	1.69298e-06	2.36642e-05	4.66143
TMEM161A	-0.0967579	7.59329	-4.81573	1.69779e-06	2.36754e-05	4.65875
ADD2	-0.126353	6.24984	-4.81565	1.69849e-06	2.36754e-05	4.65836
YY1	0.0858861	9.88613	4.81541	1.70047e-06	2.36754e-05	4.65726
TMEM160	-0.113664	7.71562	-4.81515	1.70261e-06	2.36754e-05	4.65607
PKD1P1	-0.158091	8.66434	-4.81393	1.71287e-06	2.37871e-05	4.65039
ALKBH4	-0.107845	6.01467	-4.81281	1.72227e-06	2.38867e-05	4.64522
ZFAND6	0.157661	10.0849	4.81223	1.72716e-06	2.39236e-05	4.64254
DGCR2	0.11658	6.64705	4.81166	1.73195e-06	2.39534e-05	4.63992
DERL1	0.110422	8.45378	4.81144	1.73378e-06	2.39534e-05	4.63893
CD24	0.234726	12.3622	4.81102	1.73741e-06	2.39726e-05	4.63695
RXRA	-0.13353	8.41682	-4.81066	1.74041e-06	2.39833e-05	4.63532
TUBA1C	0.129231	10.913	4.81039	1.74277e-06	2.39849e-05	4.63404
EHMT1	0.0932679	7.66714	4.80924	1.75258e-06	2.4089e-05	4.62874
CLEC5A	-0.122399	3.97007	-4.80849	1.75898e-06	2.41461e-05	4.62529
CHMP1B	0.0955191	8.97578	4.8073	1.76928e-06	2.42563e-05	4.61978
ATP6V0C	-0.12989	11.1112	-4.80615	1.77924e-06	2.43549e-05	4.61447
HIST1H3J	-0.0951296	4.31748	-4.80594	1.78101e-06	2.43549e-05	4.61353
RCBTB1	0.143988	7.33506	4.80553	1.78463e-06	2.43733e-05	4.61161
SOX13	-0.11995	6.58914	-4.80523	1.78721e-06	2.43761e-05	4.61025
PLS3	0.109079	10.8103	4.80498	1.78939e-06	2.43761e-05	4.6091
CDC27	0.188772	8.11574	4.80456	1.79304e-06	2.43948e-05	4.60718
ATF7	-0.116579	7.31292	-4.80309	1.80596e-06	2.45395e-05	4.60039
VWA5A	0.114716	8.24702	4.79911	1.84139e-06	2.49893e-05	4.58204
EIF4H	0.0698867	11.6563	4.79388	1.88898e-06	2.56028e-05	4.55793
AXIN1	-0.0930918	7.22173	-4.79341	1.89334e-06	2.56294e-05	4.55576
ATP8B1	0.202133	7.39158	4.79282	1.89874e-06	2.567e-05	4.55307
NSF	0.071754	8.23524	4.79024	1.9228e-06	2.59351e-05	4.54117
CA6	-0.0918438	5.11456	-4.79019	1.92318e-06	2.59351e-05	4.54098
UBFD1	0.0934167	8.19592	4.78827	1.94127e-06	2.61462e-05	4.53214
PSD3	0.24916	6.63564	4.78608	1.9621e-06	2.63936e-05	4.52206
HIST1H4H	-0.123919	4.87545	-4.78294	1.99226e-06	2.67657e-05	4.50765
ISYNA1	-0.135028	7.94759	-4.77936	2.02723e-06	2.72014e-05	4.49122
DDX17	0.147321	10.8796	4.77746	2.04608e-06	2.74201e-05	4.48248
PPP2R4	-0.0975957	8.35203	-4.77669	2.05376e-06	2.74773e-05	4.47894
E2F5	0.137419	7.68411	4.77652	2.05548e-06	2.74773e-05	4.47815
ADNP2	0.0983334	8.04328	4.77196	2.10141e-06	2.80562e-05	4.45729
OR1F1	-0.0669792	4.02909	-4.77098	2.11151e-06	2.81561e-05	4.45276
CCL22	-0.102002	6.94118	-4.76908	2.131e-06	2.83806e-05	4.44408
SFPQ	0.141251	9.56653	4.76725	2.14999e-06	2.85981e-05	4.4357
CYP11A1	-0.0896215	3.86952	-4.76591	2.16402e-06	2.87491e-05	4.42956
C3orf52	-0.122193	5.89243	-4.76522	2.17129e-06	2.88098e-05	4.4264
DSTYK	0.117331	7.55367	4.76483	2.17543e-06	2.88292e-05	4.42459
SPTBN4	-0.11625	5.95567	-4.76437	2.18027e-06	2.88576e-05	4.4225
TBCCD1	0.110652	6.44122	4.75945	2.23282e-06	2.9515e-05	4.40001
2023-03-08	0.110522	5.16285	4.75921	2.23544e-06	2.9515e-05	4.3989
MAT1A	-0.116727	5.70312	-4.75507	2.28063e-06	3.00745e-05	4.38001
TMC5	-0.0927663	4.41397	-4.75336	2.29962e-06	3.02877e-05	4.37218
DUSP12	0.0960927	7.68126	4.75136	2.32199e-06	3.05448e-05	4.36304
MAGIX	-0.097169	5.48552	-4.75094	2.3267e-06	3.05692e-05	4.36113
PAX5	-0.114408	8.60682	-4.74584	2.38471e-06	3.12931e-05	4.33789
KIR3DS1	-0.0945779	3.25945	-4.7447	2.39796e-06	3.14285e-05	4.33266
NPFF	-0.0943318	6.2389	-4.74333	2.41383e-06	3.15714e-05	4.32643
2023-09-08	0.153332	8.20095	4.74325	2.41475e-06	3.15714e-05	4.32607
ST6GAL1	0.202653	8.90085	4.74247	2.42384e-06	3.16174e-05	4.32252
STAR	-0.119544	5.22723	-4.74244	2.42417e-06	3.16174e-05	4.32239
BRAP	0.0609192	7.62586	4.74088	2.44258e-06	3.18189e-05	4.31525
CENPI	-0.0771758	4.36138	-4.73901	2.46466e-06	3.20676e-05	4.30676
UPK3A	-0.0921614	5.52251	-4.73814	2.475e-06	3.21629e-05	4.30281
ZNF202	-0.0847489	6.12272	-4.7352	2.51041e-06	3.25691e-05	4.2894
MSH6	0.166546	7.53103	4.73504	2.51233e-06	3.25691e-05	4.28868
SYT2	-0.0931532	5.47056	-4.73246	2.54379e-06	3.29371e-05	4.27694
KIFC1	-0.117293	4.50892	-4.72954	2.57973e-06	3.33622e-05	4.2637
GALNT4	0.125866	7.20479	4.72891	2.58756e-06	3.34232e-05	4.26084
HSD17B14	-0.283949	8.31913	-4.72758	2.60427e-06	3.35986e-05	4.25476
QPCT	0.314385	7.59671	4.7258	2.62658e-06	3.38457e-05	4.24671
LDHA	0.135494	12.3888	4.72252	2.66835e-06	3.43426e-05	4.23183
CADPS2	0.147171	8.81604	4.72165	2.67953e-06	3.44452e-05	4.22788
ARSJ	0.157409	6.04937	4.72104	2.68743e-06	3.45053e-05	4.2251
CRTC3	0.0947358	8.43336	4.71946	2.70793e-06	3.47269e-05	4.21793
LGALS8	0.109155	7.78263	4.71441	2.7744e-06	3.54954e-05	4.19505
APOOL	-0.148712	8.2678	-4.71405	2.77922e-06	3.54954e-05	4.19342
HMG20B	-0.11216	8.45912	-4.714	2.77996e-06	3.54954e-05	4.19317
USP5	-0.092895	7.50148	-4.71391	2.78109e-06	3.54954e-05	4.19278
APEH	-0.110707	8.95682	-4.713	2.79322e-06	3.56065e-05	4.18867
ZFP36L2	0.144005	9.70992	4.71276	2.79644e-06	3.56065e-05	4.18759
KDM3B	0.0882596	8.52828	4.71129	2.81634e-06	3.57948e-05	4.1809
GUCY1A3	0.193667	8.81067	4.71117	2.81791e-06	3.57948e-05	4.18037
SCRT1	-0.0761741	3.93416	-4.71035	2.82898e-06	3.58929e-05	4.17667
TSPAN6	0.165987	9.68663	4.70918	2.8449e-06	3.60522e-05	4.17138
MASP2	-0.0843696	5.95555	-4.70654	2.88121e-06	3.643e-05	4.15942
NFKB1	0.128886	8.55551	4.70652	2.8815e-06	3.643e-05	4.15932
LZTS1	-0.121151	6.72494	-4.70545	2.89634e-06	3.65744e-05	4.15447
NAB1	0.109124	7.8038	4.70473	2.90626e-06	3.66565e-05	4.15125
PRSS53	-0.10615	5.19254	-4.70334	2.92576e-06	3.68591e-05	4.14494
BCL9	-0.0990145	6.03413	-4.70298	2.93079e-06	3.68791e-05	4.14332
RFK	0.109803	9.32026	4.70128	2.95475e-06	3.7137e-05	4.13564
HMGCS1	0.105403	7.64478	4.69893	2.98813e-06	3.75126e-05	4.12505
CMAS	0.0807977	8.18414	4.69647	3.02354e-06	3.7902e-05	4.11393
DCTN4	0.089233	9.33942	4.69629	3.02622e-06	3.7902e-05	4.1131
ALG5	0.094823	9.38295	4.69345	3.06752e-06	3.83745e-05	4.10031
NAE1	0.096609	9.31455	4.69254	3.08091e-06	3.8497e-05	4.09621
DGKA	-0.112911	6.81307	-4.69181	3.09168e-06	3.85866e-05	4.09291
FNDC8	-0.0882922	3.99376	-4.69102	3.10349e-06	3.86889e-05	4.08932
NME4	-0.137836	8.40755	-4.68947	3.12653e-06	3.89309e-05	4.08234
AP3M2	0.0804454	7.41508	4.68793	3.14964e-06	3.91732e-05	4.0754
DPAGT1	-0.104874	8.50576	-4.68705	3.16285e-06	3.92919e-05	4.07145
PDIA2	-0.0956461	4.89829	-4.68661	3.16955e-06	3.93296e-05	4.06946
MLLT3	0.152676	5.82887	4.68341	3.2184e-06	3.98895e-05	4.05503
MPL	-0.0855124	4.42939	-4.68312	3.22276e-06	3.98974e-05	4.05376
TTC13	0.162261	6.9478	4.68067	3.26078e-06	4.03215e-05	4.0427
PYY2	-0.0942639	6.58471	-4.67893	3.28788e-06	4.06099e-05	4.03489
CCND2	0.278377	7.93886	4.67829	3.29797e-06	4.06876e-05	4.032
CARD14	-0.0884782	5.99864	-4.67737	3.31247e-06	4.07693e-05	4.02787
NEU2	-0.0834002	5.92121	-4.67731	3.3134e-06	4.07693e-05	4.0276
FAU	0.0688517	12.6332	4.67714	3.316e-06	4.07693e-05	4.02686
TBRG4	-0.0903613	7.62085	-4.67682	3.32116e-06	4.0786e-05	4.0254
ATP2A2	0.108283	9.55793	4.67526	3.34588e-06	4.10425e-05	4.0184
DNM2	-0.0807413	8.635	-4.6729	3.3837e-06	4.14329e-05	4.00781
PNMAL1	0.194286	7.92222	4.6728	3.38543e-06	4.14329e-05	4.00733
FRMD4A	0.186726	7.41168	4.67253	3.38975e-06	4.14385e-05	4.00612
SLCO5A1	-0.0998705	5.21129	-4.67044	3.42369e-06	4.18057e-05	3.99673
TYR	-0.095852	6.18537	-4.66985	3.43323e-06	4.18744e-05	3.99411
GATA1	-0.0815672	5.77703	-4.66957	3.43792e-06	4.1884e-05	3.99282
EPS15L1	-0.112752	6.80133	-4.6683	3.45872e-06	4.20436e-05	3.98713
PHF20	0.108833	7.42828	4.66829	3.45886e-06	4.20436e-05	3.98709
LECT1	-0.0897629	3.98789	-4.66722	3.47652e-06	4.22104e-05	3.98229
ARFGAP3	0.127984	9.55357	4.66659	3.4869e-06	4.22886e-05	3.97948
HIST1H2BE	-0.113637	5.2306	-4.66528	3.5087e-06	4.2464e-05	3.97361
SLC19A1	-0.0845474	6.84013	-4.66525	3.50929e-06	4.2464e-05	3.97345
PRKAG1	-0.110722	9.16139	-4.6647	3.51848e-06	4.25272e-05	3.97098
OCLN	0.199215	7.47331	4.66433	3.52469e-06	4.25542e-05	3.96932
INSIG1	0.186868	8.06204	4.66371	3.53505e-06	4.26314e-05	3.96655
HOXB7	0.164089	8.29346	4.66339	3.54043e-06	4.26483e-05	3.96512
ZMYM2	0.131219	7.63192	4.66195	3.56474e-06	4.28929e-05	3.95867
GPR107	0.1055	7.73652	4.66083	3.58377e-06	4.30735e-05	3.95365
GSTK1	-0.0859831	10.7772	-4.66054	3.5887e-06	4.30844e-05	3.95236
PLP1	-0.120792	4.78041	-4.65867	3.62078e-06	4.34211e-05	3.94397
NDUFB1	-0.082181	10.9193	-4.65759	3.63943e-06	4.35959e-05	3.93912
TBC1D16	0.144496	6.21476	4.6557	3.67226e-06	4.394e-05	3.93066
HSPA5	0.126582	11.106	4.65506	3.68339e-06	4.40241e-05	3.92781
B3GAT1	-0.1013	5.50681	-4.65315	3.71695e-06	4.43758e-05	3.91926
LARP4B	-0.0908099	7.8635	-4.64919	3.78746e-06	4.51673e-05	3.90155
PMPCA	-0.0948283	9.28115	-4.64529	3.85822e-06	4.59565e-05	3.8841
NMUR1	-0.0684779	6.53751	-4.64487	3.86587e-06	4.59565e-05	3.88223
SEC22B	0.0932189	8.44093	4.64459	3.87095e-06	4.59565e-05	3.881
PTPRS	-0.0974289	6.99755	-4.64457	3.8714e-06	4.59565e-05	3.88089
SEMA4F	0.0705145	5.82781	4.64437	3.87508e-06	4.59565e-05	3.87999
RUFY2	0.147879	5.88387	4.644	3.88185e-06	4.5986e-05	3.87835
SNX17	-0.0802015	9.50638	-4.64289	3.90224e-06	4.61765e-05	3.87341
NRAS	0.110602	9.02221	4.64218	3.91553e-06	4.62827e-05	3.87021
GRIN2C	-0.0861358	5.66331	-4.64102	3.93692e-06	4.64842e-05	3.86507
SCIN	0.239571	9.18552	4.64076	3.94191e-06	4.6492e-05	3.86388
IGFALS	-0.103205	6.24897	-4.63936	3.96799e-06	4.67481e-05	3.85767
PIK3CA	-0.140321	7.23004	-4.63892	3.97629e-06	4.67945e-05	3.8557
PAF1	0.0869735	7.60189	4.63798	3.99403e-06	4.69518e-05	3.8515
PRPS2	0.13391	8.39547	4.63666	4.01903e-06	4.71939e-05	3.84562
TCOF1	-0.0921507	6.94148	-4.63528	4.04542e-06	4.74518e-05	3.83946
IGSF1	-0.113349	5.40501	-4.63478	4.05507e-06	4.7513e-05	3.83721
TOB1	0.178396	10.4029	4.63295	4.09017e-06	4.7872e-05	3.82909
NMNAT2	-0.0998038	5.32588	-4.63213	4.10606e-06	4.80055e-05	3.82544
TGM4	-0.103317	4.46984	-4.63145	4.1193e-06	4.80785e-05	3.8224
DNMT3B	-0.0848041	6.23969	-4.63135	4.12127e-06	4.80785e-05	3.82195
C11orf24	-0.0848815	7.06907	-4.63041	4.13972e-06	4.82412e-05	3.81774
2023-03-06	0.130892	9.59434	4.62872	4.1729e-06	4.85751e-05	3.81022
NECAB2	-0.231317	6.83685	-4.62454	4.25599e-06	4.94885e-05	3.79165
SGMS1	0.149498	8.33461	4.62385	4.27002e-06	4.9598e-05	3.78855
TNIP1	-0.0847994	8.77808	-4.62235	4.30037e-06	4.9823e-05	3.78187
MTA1	-0.153357	7.85625	-4.62225	4.30241e-06	4.9823e-05	3.78143
MYO1D	0.143662	7.49681	4.6222	4.30334e-06	4.9823e-05	3.78122
DGCR6	-0.12368	8.72274	-4.61868	4.37531e-06	5.06017e-05	3.7656
HHLA3	-0.14134	6.12563	-4.61773	4.39506e-06	5.07753e-05	3.76136
LEMD3	0.0847387	7.87122	4.61552	4.441e-06	5.12498e-05	3.75156
FSCN1	-0.129067	7.26588	-4.6153	4.44569e-06	5.12498e-05	3.75057
RGS12	-0.0679132	7.30663	-4.61414	4.46994e-06	5.1474e-05	3.74544
FCGRT	-0.120182	10.8897	-4.61202	4.51481e-06	5.19349e-05	3.73604
UBR7	0.0902725	7.09522	4.61008	4.55634e-06	5.23564e-05	3.72741
BLNK	0.193548	8.8548	4.60968	4.56485e-06	5.2398e-05	3.72565
CRCP	0.161567	6.89797	4.60742	4.61369e-06	5.2902e-05	3.71563
MDC1	0.108934	7.49589	4.60521	4.66189e-06	5.33976e-05	3.70584
SCAMP2	-0.110377	8.91659	-4.60428	4.68234e-06	5.35745e-05	3.70172
ZDHHC24	-0.11189	7.45962	-4.6025	4.72164e-06	5.39666e-05	3.69385
ITPK1	-0.101621	8.60743	-4.6007	4.76189e-06	5.43688e-05	3.68585
ZNF22	0.102293	8.36635	4.60017	4.77363e-06	5.44448e-05	3.68354
TECTA	-0.114728	4.22868	-4.59896	4.80084e-06	5.4697e-05	3.67818
PNRC2	0.0908465	10.2964	4.59845	4.8125e-06	5.47536e-05	3.6759
SPEG	-0.150193	5.63829	-4.59822	4.81765e-06	5.47536e-05	3.67489
MEX3C	0.106133	7.62169	4.59807	4.82113e-06	5.47536e-05	3.67421
SF3A2	-0.141544	7.62759	-4.5975	4.83393e-06	5.48408e-05	3.67172
TCL1B	-0.0983502	4.47757	-4.59663	4.85385e-06	5.49807e-05	3.66784
HSFX1	-0.0793614	5.92485	-4.59651	4.85652e-06	5.49807e-05	3.66733
C16orf58	-0.0955487	7.89177	-4.59366	4.92196e-06	5.56628e-05	3.65472
SPACA1	-0.104712	5.13072	-4.59087	4.98666e-06	5.63351e-05	3.64243
ACTR3	0.147409	10.3528	4.58974	5.01335e-06	5.65761e-05	3.6374
PRAMEF10	-0.0819632	3.80415	-4.58952	5.01855e-06	5.65761e-05	3.63642
CDC45	-0.0980964	4.8121	-4.5891	5.02831e-06	5.66265e-05	3.63459
ACOT8	-0.0911701	7.53271	-4.5881	5.05191e-06	5.68327e-05	3.63019
C1orf95	-0.0890925	4.38991	-4.58681	5.08257e-06	5.71177e-05	3.62449
MFHAS1	0.143969	8.70602	4.58297	5.17496e-06	5.8095e-05	3.60753
TSPAN3	0.129016	10.9964	4.58212	5.19559e-06	5.82065e-05	3.60378
ZNF587	0.140001	6.31009	4.58211	5.19575e-06	5.82065e-05	3.60375
LY6D	-0.0927566	6.2925	-4.58164	5.20712e-06	5.82196e-05	3.6017
MET	0.183223	8.67921	4.58158	5.20873e-06	5.82196e-05	3.60141
GPATCH1	0.0788183	7.33761	4.58139	5.21321e-06	5.82196e-05	3.6006
GRIP1	0.189749	5.58845	4.57945	5.26088e-06	5.86909e-05	3.59203
EMD	-0.104366	7.95646	-4.57833	5.2884e-06	5.8935e-05	3.58711
ZBTB48	-0.0984161	7.06127	-4.5781	5.29413e-06	5.8935e-05	3.5861
RAB11B	0.0836191	9.25322	4.5779	5.29926e-06	5.8935e-05	3.58518
ZNF224	0.123088	6.64565	4.57743	5.31075e-06	5.90016e-05	3.58315
CDCA3	-0.114304	4.11957	-4.57641	5.33626e-06	5.92237e-05	3.57863
STAT6	0.14633	8.81598	4.57324	5.41589e-06	6.00452e-05	3.56469
SYNPO2L	-0.273554	4.76584	-4.57291	5.42431e-06	6.00765e-05	3.56323
CD1A	-0.0892069	4.155	-4.57139	5.46288e-06	6.04412e-05	3.55656
SYT11	0.167577	6.07466	4.57072	5.48002e-06	6.05684e-05	3.55361
MRPL35	-0.103529	8.13898	-4.56727	5.56901e-06	6.14885e-05	3.53845
HPS1	-0.0780318	7.48391	-4.56697	5.57702e-06	6.15136e-05	3.5371
SLC2A4RG	-0.14926	9.24389	-4.56576	5.60845e-06	6.17967e-05	3.53181
GLO1	0.067949	10.0204	4.56498	5.62897e-06	6.19591e-05	3.52837
ANXA8	-0.128846	5.75087	-4.56121	5.72876e-06	6.29929e-05	3.51183
PRDM11	-0.0924173	4.45976	-4.5602	5.75601e-06	6.31935e-05	3.50737
ADAM23	-0.0798005	3.62662	-4.56009	5.7588e-06	6.31935e-05	3.50691
SMNDC1	0.0851273	8.87792	4.55973	5.76844e-06	6.32346e-05	3.50534
PRSS50	-0.091932	3.86183	-4.55921	5.78254e-06	6.33149e-05	3.50304
KPNB1	0.10107	10.2066	4.55902	5.78758e-06	6.33149e-05	3.50222
LPCAT1	0.208738	7.59274	4.55879	5.79391e-06	6.33195e-05	3.50119
ING1	0.102819	6.92693	4.55836	5.80546e-06	6.33812e-05	3.49932
REG1P	-0.104449	5.24362	-4.55812	5.81204e-06	6.33885e-05	3.49825
G6PC3	-0.10092	8.12137	-4.55741	5.83132e-06	6.35341e-05	3.49513
SELP	0.217354	6.84646	4.55718	5.8374e-06	6.35358e-05	3.49415
ABCC8	-0.0917655	5.33151	-4.55645	5.85753e-06	6.36902e-05	3.49091
INPP5D	-0.114586	6.87861	-4.55525	5.89028e-06	6.39814e-05	3.48567
GAPDH	-0.0935808	13.0492	-4.55296	5.95327e-06	6.44744e-05	3.47566
CDS1	0.187888	7.64404	4.55295	5.95359e-06	6.44744e-05	3.47561
ZNF551	0.130524	4.77554	4.55291	5.95473e-06	6.44744e-05	3.47543
SRBD1	0.0918127	6.87313	4.55266	5.96181e-06	6.44744e-05	3.47431
PPP2R5E	0.0910945	9.24265	4.55252	5.96573e-06	6.44744e-05	3.47369
MINA	0.0996431	8.16507	4.55126	6.0007e-06	6.4787e-05	3.46819
HPSE2	-0.0936528	3.76057	-4.55079	6.01377e-06	6.48628e-05	3.46614
MAPK1	0.089239	9.13314	4.54929	6.05589e-06	6.52515e-05	3.45958
CYP1A2	-0.104056	8.60083	-4.54838	6.08181e-06	6.5465e-05	3.45556
KRT2	-0.144082	4.44645	-4.54801	6.09213e-06	6.55102e-05	3.45396
IARS	0.0852116	10.3007	4.54561	6.16059e-06	6.618e-05	3.44345
VGLL4	0.0865163	8.00161	4.54441	6.19513e-06	6.64844e-05	3.43819
ARFIP2	-0.119706	8.6999	-4.54362	6.21784e-06	6.65958e-05	3.43475
UBE2J1	0.184006	8.54666	4.54362	6.21792e-06	6.65958e-05	3.43473
GGPS1	0.0657406	8.62949	4.54339	6.22448e-06	6.65995e-05	3.43374
SIX3	-0.0981602	4.06996	-4.54113	6.29011e-06	6.72346e-05	3.42388
BARX2	-0.100992	6.23109	-4.53881	6.35827e-06	6.78954e-05	3.41374
PNPLA6	-0.114704	7.5894	-4.53603	6.44081e-06	6.86674e-05	3.4016
SULT1B1	-0.0977811	4.06451	-4.53581	6.44742e-06	6.86674e-05	3.40064
TIAL1	0.0948442	8.41705	4.53556	6.4551e-06	6.86674e-05	3.39952
SSH3	-0.0826359	6.60578	-4.53552	6.45619e-06	6.86674e-05	3.39936
MRPL49	-0.0979916	9.73342	-4.53501	6.47135e-06	6.87605e-05	3.39715
TRIM44	0.0835825	9.72925	4.53474	6.47952e-06	6.87791e-05	3.39597
GRM5	0.103038	3.71757	4.53443	6.4888e-06	6.88095e-05	3.39462
NR1H2	-0.0999441	8.25466	-4.5342	6.49577e-06	6.88154e-05	3.39361
FXYD7	-0.0987105	6.32202	-4.53265	6.54279e-06	6.92451e-05	3.38683
CYP2A13	-0.0891913	4.53334	-4.53233	6.55247e-06	6.92792e-05	3.38543
PLSCR1	0.212363	9.93194	4.531	6.59309e-06	6.96399e-05	3.37962
PPP2R5C	0.10172	8.63768	4.53076	6.6003e-06	6.96475e-05	3.37859
MMP28	-0.0956898	6.22091	-4.53015	6.61909e-06	6.97771e-05	3.37592
ALG6	0.110373	7.86823	4.52855	6.66836e-06	7.02274e-05	3.36895
DHX40	0.0847658	9.04038	4.52816	6.68041e-06	7.02853e-05	3.36725
ZNF185	0.118163	7.15636	4.52385	6.8149e-06	7.16299e-05	3.3485
TAF9B	0.10462	7.54076	4.52351	6.82577e-06	7.16739e-05	3.347
LEPROTL1	0.0820039	9.09976	4.52229	6.8644e-06	7.2009e-05	3.34169
GALK1	-0.138206	7.32407	-4.52142	6.89215e-06	7.22294e-05	3.3379
LGR5	-0.118685	5.55802	-4.52051	6.92112e-06	7.24623e-05	3.33396
PLXNB3	-0.0776143	5.83295	-4.51948	6.95438e-06	7.27395e-05	3.32945
NR5A2	-0.105674	4.08386	-4.51913	6.96546e-06	7.27844e-05	3.32795
TOR3A	0.128876	6.98837	4.51858	6.98325e-06	7.28991e-05	3.32555
ARL6IP1	0.132142	10.2456	4.51798	7.0028e-06	7.30321e-05	3.32292
H3F3B	0.101102	11.8259	4.51593	7.06957e-06	7.36568e-05	3.314
C7orf43	-0.0858626	7.25316	-4.51378	7.14015e-06	7.432e-05	3.30466
PIGZ	-0.0846786	5.65308	-4.51038	7.25309e-06	7.54223e-05	3.2899
FBXO4	0.102373	6.71954	4.50936	7.28718e-06	7.57033e-05	3.28549
DSTN	0.108467	12.0277	4.50875	7.30775e-06	7.58435e-05	3.28284
PDCD6	0.115378	9.84026	4.50831	7.32272e-06	7.59254e-05	3.28092
MFSD1	0.106843	10.4906	4.50708	7.36434e-06	7.62831e-05	3.27559
STMN4	-0.0902068	4.03724	-4.50667	7.37826e-06	7.63536e-05	3.27381
ERCC4	-0.0913789	6.94074	-4.50616	7.39579e-06	7.63727e-05	3.27158
RBM39	0.0928982	10.3547	4.50609	7.39805e-06	7.63727e-05	3.2713
HOOK2	-0.105526	8.60038	-4.50599	7.40147e-06	7.63727e-05	3.27086
ELMO1	-0.13361	6.52727	-4.50377	7.47782e-06	7.70862e-05	3.26121
FAM114A2	0.0782252	7.73794	4.50194	7.54115e-06	7.76644e-05	3.25328
SIGLEC8	-0.0812191	6.32881	-4.50164	7.5517e-06	7.76985e-05	3.25197
IKZF3	0.243136	4.34874	4.5004	7.59467e-06	7.80518e-05	3.24663
TARBP1	0.100864	7.98328	4.50024	7.60061e-06	7.80518e-05	3.2459
KEL	-0.0803475	4.43442	-4.49998	7.60941e-06	7.80674e-05	3.24481
ITM2C	0.200496	9.66673	4.49869	7.65481e-06	7.84582e-05	3.23922
MRFAP1L1	0.0870753	9.2296	4.49839	7.66546e-06	7.84662e-05	3.23791
FXYD2	-0.186501	9.70939	-4.49826	7.67024e-06	7.84662e-05	3.23733
HNRNPH3	0.0984185	9.77411	4.49531	7.77505e-06	7.94242e-05	3.22457
WRNIP1	0.0593672	8.54298	4.49521	7.7787e-06	7.94242e-05	3.22413
NOL3	-0.108721	7.24607	-4.49494	7.78816e-06	7.94452e-05	3.22298
POGK	0.0951866	8.21843	4.49346	7.84137e-06	7.99119e-05	3.21658
ZNF468	0.268849	6.41207	4.49321	7.85047e-06	7.99287e-05	3.21549
ZNF395	0.106448	8.42032	4.49266	7.87054e-06	8.0027e-05	3.21309
ZNF710	0.0914162	6.98685	4.49253	7.87506e-06	8.0027e-05	3.21255
LOC728026	0.101905	12.6196	4.49007	7.96466e-06	8.08244e-05	3.20192
DCXR	-0.326164	11.5729	-4.48997	7.96861e-06	8.08244e-05	3.20146
GNE	0.157547	8.02185	4.48941	7.98887e-06	8.09534e-05	3.19907
SCAND1	-0.0973196	9.95232	-4.48903	8.00302e-06	8.10202e-05	3.1974
CPN1	-0.100601	5.53947	-4.48757	8.05684e-06	8.14881e-05	3.19111
ALLC	-0.216743	4.86743	-4.48663	8.09199e-06	8.17665e-05	3.18701
TMEM50A	0.133243	9.89461	4.48495	8.1545e-06	8.23206e-05	3.17978
LOC202181	-0.108068	5.60313	-4.48243	8.2493e-06	8.31992e-05	3.16892
MRPL52	-0.105392	8.27099	-4.48192	8.26877e-06	8.33172e-05	3.1667
ZNF230	0.0843805	5.34553	4.47948	8.36205e-06	8.41779e-05	3.15616
SLPI	0.499911	9.02085	4.47691	8.46137e-06	8.50978e-05	3.14507
SNAP91	-0.0740878	5.94666	-4.47656	8.47485e-06	8.51536e-05	3.14357
NFKBIB	-0.10239	6.471	-4.47576	8.50602e-06	8.53867e-05	3.14012
LMF1	-0.123788	6.46704	-4.47501	8.53518e-06	8.55993e-05	3.1369
VAPA	0.0898938	10.0408	4.47421	8.56651e-06	8.57842e-05	3.13346
CSHL1	-0.113279	4.84374	-4.47413	8.56962e-06	8.57842e-05	3.13312
CELF1	0.122119	8.69756	4.47301	8.61406e-06	8.61486e-05	3.12826
NDUFB11	-0.090438	10.1235	-4.47143	8.67665e-06	8.66938e-05	3.12146
RFPL3	-0.0866902	3.45173	-4.46991	8.73716e-06	8.71894e-05	3.11493
CEPT1	0.0915769	7.93689	4.46978	8.74253e-06	8.71894e-05	3.11435
DOCK9	0.169685	7.32672	4.46932	8.76072e-06	8.72897e-05	3.1124
PRDM14	-0.0916819	3.99424	-4.46822	8.80489e-06	8.76483e-05	3.10767
IFNGR1	0.209922	9.52067	4.46765	8.82822e-06	8.77991e-05	3.10519
PHF11	0.136025	8.76235	4.46264	9.03276e-06	8.975e-05	3.08367
UBP1	0.0918594	8.78297	4.4612	9.09266e-06	9.02466e-05	3.07746
COQ9	-0.111938	9.49037	-4.46103	9.09957e-06	9.02466e-05	3.07674
NR1D1	-0.119522	6.65252	-4.4606	9.11759e-06	9.03416e-05	3.07489
CDK5	-0.107006	6.39096	-4.4594	9.16773e-06	9.07546e-05	3.06973
GPR173	-0.0820742	5.16792	-4.45731	9.25571e-06	9.15411e-05	3.06076
ITGA10	-0.0821342	5.87563	-4.45706	9.26647e-06	9.1563e-05	3.05967
MRPS12	-0.0930464	8.09582	-4.45633	9.29744e-06	9.17844e-05	3.05654
MPST	-0.133706	8.71486	-4.45598	9.31213e-06	9.18449e-05	3.05505
HOXB2	0.143346	8.89715	4.45569	9.32432e-06	9.18623e-05	3.05382
PARP8	0.16457	6.92732	4.45554	9.33104e-06	9.18623e-05	3.05315
PCIF1	-0.0720717	7.5481	-4.45506	9.35141e-06	9.19784e-05	3.0511
SEC22A	0.0758731	6.91699	4.45339	9.42318e-06	9.25885e-05	3.04392
MOAP1	0.0759188	9.59181	4.45321	9.43071e-06	9.25885e-05	3.04317
LPA	-0.26444	4.87343	-4.45245	9.46339e-06	9.28244e-05	3.03992
ZMPSTE24	0.0867687	10.1716	4.45136	9.51072e-06	9.32033e-05	3.03523
SREBF2	-0.104988	8.04625	-4.45053	9.54695e-06	9.3473e-05	3.03166
ANAPC2	-0.106699	6.76243	-4.44918	9.60581e-06	9.39634e-05	3.02589
ACSL4	0.182928	9.09667	4.44813	9.65184e-06	9.43157e-05	3.0214
RNASEL	0.115718	7.01131	4.44796	9.65942e-06	9.43157e-05	3.02066
WDR73	0.0773651	8.08139	4.44731	9.68834e-06	9.45072e-05	3.01785
SUN1	0.12396	9.19964	4.44712	9.69666e-06	9.45072e-05	3.01705
PKMYT1	-0.100286	8.00249	-4.44655	9.72172e-06	9.46654e-05	3.01462
AIM1	0.125367	9.43756	4.44567	9.76085e-06	9.49601e-05	3.01085
C5orf28	0.165358	6.78925	4.44477	9.80095e-06	9.52638e-05	3.007
PDCL	0.0937788	6.74646	4.44454	9.81125e-06	9.52776e-05	3.00601
HTR7P1	0.113417	4.68466	4.44182	9.93348e-06	9.63772e-05	2.99439
WDR1	0.092184	9.96129	4.43823	1.00973e-05	9.78782e-05	2.97902
EPB41L1	0.161899	7.69196	4.43711	1.01489e-05	9.8289e-05	2.97424
MAP3K6	-0.100366	5.82084	-4.43678	1.01645e-05	9.83513e-05	2.9728
LRRFIP1	0.16622	9.25542	4.43577	1.02113e-05	9.86436e-05	2.96848
NUP88	0.0941637	7.07789	4.43573	1.02131e-05	9.86436e-05	2.96832
DDX41	-0.0951769	8.23759	-4.43513	1.0241e-05	9.88242e-05	2.96576
STK38	0.122832	8.35701	4.43487	1.02532e-05	9.88529e-05	2.96464
SDCBP	0.111833	10.8545	4.42865	1.05473e-05	0.000101597	2.93809
PFKFB1	-0.118841	5.6237	-4.4258	1.06845e-05	0.000102826	2.92595
LSS	-0.0844187	6.81108	-4.42451	1.07477e-05	0.000103341	2.92042
MEOX1	-0.145305	4.97587	-4.42397	1.0774e-05	0.000103502	2.91812
CXADR	0.209998	8.5827	4.42272	1.08354e-05	0.000103998	2.91279
ZNF217	0.133467	8.60295	4.42151	1.08949e-05	0.000104476	2.90765
SGCE	0.102509	8.70336	4.42088	1.09258e-05	0.000104678	2.90499
SHOX2	-0.103407	4.11368	-4.41845	1.10473e-05	0.000105745	2.89461
GPR1	-0.088812	4.54114	-4.41826	1.10568e-05	0.000105745	2.8938
MDM4	0.127618	7.59183	4.41784	1.10777e-05	0.000105793	2.89203
UPK3B	-0.0868044	5.68957	-4.41776	1.10816e-05	0.000105793	2.8917
SYT5	-0.0725175	5.08872	-4.41751	1.10943e-05	0.00010582	2.89062
CHN1	0.217845	5.8616	4.41689	1.11257e-05	0.000105954	2.88797
DPM2	-0.0860564	8.42441	-4.41675	1.11329e-05	0.000105954	2.88736
BANF1	-0.116821	9.29094	-4.41664	1.1138e-05	0.000105954	2.88693
FAM32A	-0.0607746	9.18071	-4.41563	1.11891e-05	0.000106307	2.88263
CGB	-0.0940908	7.69447	-4.41552	1.11949e-05	0.000106307	2.88215
NDUFAF4	-0.0964151	8.37375	-4.41481	1.12311e-05	0.000106556	2.87912
ATP5G1	-0.112701	9.66491	-4.41409	1.12679e-05	0.000106811	2.87604
TPM1	0.227491	10.3507	4.41237	1.13557e-05	0.000107548	2.86876
ZNF384	-0.0738012	7.91542	-4.41007	1.14748e-05	0.00010858	2.85897
SCMH1	-0.108219	7.44596	-4.4098	1.14888e-05	0.000108616	2.85783
NHLH2	-0.0849655	4.32273	-4.40797	1.15843e-05	0.000109423	2.85006
PTPRF	0.153524	9.08312	4.40548	1.17156e-05	0.000110566	2.83947
PELI1	0.160981	7.14771	4.40436	1.17748e-05	0.000111027	2.83474
TMEM39A	0.0951873	6.72358	4.40353	1.18193e-05	0.000111349	2.8312
CAPN2	0.0884938	10.4688	4.40292	1.1852e-05	0.000111494	2.82862
HS3ST1	0.298989	6.72988	4.40285	1.18555e-05	0.000111494	2.82833
TSPAN4	-0.117657	8.65365	-4.40133	1.19373e-05	0.000112164	2.82189
ETV2	-0.10619	5.04581	-4.39911	1.20579e-05	0.000113199	2.81245
TMEM214	-0.0831028	7.52817	-4.39753	1.21441e-05	0.000113908	2.80577
TMEM176B	-0.155905	10.6331	-4.39661	1.21948e-05	0.000114284	2.80186
PYCRL	-0.0877938	7.07299	-4.39555	1.22532e-05	0.000114731	2.79737
SOAT1	0.161374	7.70129	4.39388	1.23459e-05	0.000115497	2.79031
PEX1	0.107771	8.21954	4.39257	1.24194e-05	0.000116084	2.78473
B3GALT5	-0.0832949	4.84885	-4.39078	1.25197e-05	0.000116919	2.77719
OLFML3	-0.18887	8.71029	-4.39043	1.25398e-05	0.000117005	2.77568
ZFYVE9	-0.127138	7.04769	-4.38909	1.26155e-05	0.00011761	2.77003
PLEKHA2	0.151597	8.43929	4.38856	1.2646e-05	0.000117792	2.76777
CCT6A	0.0934282	9.13774	4.38835	1.26578e-05	0.000117799	2.76689
PLA2G5	-0.0914638	4.28772	-4.3875	1.27064e-05	0.000118148	2.7633
UBE2D3	0.0921238	10.7066	4.3872	1.27237e-05	0.000118207	2.76202
LRP2BP	-0.0753206	3.23797	-4.38598	1.27938e-05	0.000118755	2.75687
OSGEP	0.0891022	7.26569	4.38522	1.28378e-05	0.00011906	2.75365
ZNF835	-0.0820297	5.62089	-4.38389	1.29147e-05	0.000119671	2.74804
PPIA	0.062861	11.4464	4.38322	1.29537e-05	0.000119928	2.74522
MAGT1	0.0873959	9.73878	4.38283	1.29766e-05	0.00012001	2.74356
UNG	0.108968	7.79139	4.38269	1.2985e-05	0.00012001	2.74295
RPS23	0.126575	11.7856	4.38247	1.29979e-05	0.000120026	2.74202
MS4A1	0.432655	5.50315	4.38155	1.30516e-05	0.000120419	2.73815
TIPIN	0.0890614	11.2631	4.37986	1.31511e-05	0.000121232	2.73103
FASTKD2	0.0845451	7.71036	4.37947	1.31742e-05	0.000121341	2.72938
TTC27	0.0675079	7.20476	4.37913	1.31945e-05	0.000121423	2.72794
TARBP2	-0.079049	7.28378	-4.37863	1.32243e-05	0.000121593	2.72582
TMEM165	0.12319	9.23275	4.37779	1.32746e-05	0.000121951	2.72226
HMGA2	-0.0866515	5.97831	-4.37757	1.32875e-05	0.000121965	2.72135
PEX2	0.0853751	8.28958	4.37707	1.33171e-05	0.000122133	2.71926
TMPRSS6	-0.0882421	7.2999	-4.37641	1.33573e-05	0.000122396	2.71644
KRT83	-0.0875391	5.24407	-4.37502	1.34407e-05	0.000123055	2.7106
ACVR2A	-0.0935756	7.46369	-4.37414	1.34941e-05	0.000123379	2.70688
PITX1	-0.104421	5.02809	-4.37404	1.35004e-05	0.000123379	2.70644
ALOXE3	-0.077135	4.98181	-4.37387	1.35105e-05	0.000123379	2.70574
FUS	0.129527	10.1454	4.37321	1.35509e-05	0.000123641	2.70294
KIF22	-0.110549	6.72763	-4.37266	1.35839e-05	0.000123838	2.70066
TMEM50B	0.128166	8.94973	4.3721	1.36185e-05	0.000124047	2.69828
SLC39A1	-0.0851736	9.13147	-4.37084	1.36955e-05	0.000124643	2.69299
SMC2	-0.130958	6.50819	-4.36469	1.40789e-05	0.000128023	2.6671
NKX6-1	-0.0771116	3.88274	-4.36437	1.40992e-05	0.0001281	2.66574
PRPH	-0.0904653	5.08676	-4.36347	1.41566e-05	0.000128409	2.66193
PCID2	0.114013	7.81912	4.36346	1.41573e-05	0.000128409	2.66189
DUX4	-0.119571	7.48022	-4.36303	1.41842e-05	0.000128545	2.6601
NUDCD3	-0.0855035	8.52741	-4.36218	1.42388e-05	0.000128931	2.6565
ECM1	-0.175336	7.11831	-4.36149	1.42823e-05	0.000129216	2.65364
SLC38A1	0.182507	8.72228	4.36022	1.43642e-05	0.000129818	2.64828
C10orf12	-0.0940403	4.78939	-4.36008	1.43731e-05	0.000129818	2.6477
POU2F3	-0.0920867	4.99881	-4.35973	1.4396e-05	0.000129916	2.64621
ZMYM1	-0.104822	6.06852	-4.35724	1.45571e-05	0.000131259	2.63577
ETV1	0.170027	6.66028	4.35696	1.45754e-05	0.000131314	2.63459
PGGT1B	0.117918	6.74584	4.35155	1.49331e-05	0.000134418	2.61186
E2F6	0.118254	6.15386	4.35137	1.49451e-05	0.000134418	2.61111
RAB3B	-0.0735274	4.95802	-4.35102	1.49684e-05	0.000134515	2.60965
DIAPH1	-0.0724618	8.89181	-4.35031	1.50158e-05	0.000134827	2.60669
CPNE1	-0.108222	8.75545	-4.34918	1.50923e-05	0.000135401	2.60192
PYROXD1	-0.148477	8.55838	-4.34458	1.54061e-05	0.000138012	2.58264
B3GALNT1	0.149528	8.19412	4.34453	1.54091e-05	0.000138012	2.58245
CYP19A1	-0.0791989	3.98152	-4.34201	1.55836e-05	0.000139459	2.57189
CCDC90B	0.114544	7.97257	4.34027	1.57049e-05	0.000140427	2.56463
ARMCX5	0.0816205	7.28448	4.33913	1.57856e-05	0.000141006	2.55983
ARL4C	0.319115	7.52074	4.33898	1.57959e-05	0.000141006	2.55921
GNLY	-0.222605	6.20103	-4.33808	1.58598e-05	0.000141458	2.55543
LAMA3	0.164757	5.50761	4.33215	1.62844e-05	0.000145057	2.53067
TBL3	-0.0954148	7.24044	-4.33204	1.62927e-05	0.000145057	2.53019
PADI1	-0.0805142	5.41174	-4.33188	1.63039e-05	0.000145057	2.52955
NLGN3	-0.0785898	6.38286	-4.33128	1.63476e-05	0.000145326	2.52704
ZNF232	0.148645	7.02202	4.33061	1.63964e-05	0.000145639	2.52424
HIST1H2AK	-0.125512	4.93053	-4.32702	1.66611e-05	0.000147867	2.50924
CASP8	0.0928806	6.94808	4.32651	1.66989e-05	0.00014808	2.50711
RDX	-0.125817	9.21178	-4.32525	1.67932e-05	0.000148696	2.50184
ZC3HAV1	0.105647	9.31304	4.32521	1.6796e-05	0.000148696	2.50168
NPRL3	-0.0894753	6.98611	-4.32303	1.69594e-05	0.000150018	2.49261
GLRA1	-0.069951	3.58077	-4.32255	1.69956e-05	0.000150215	2.49061
IFNW1	-0.065482	3.67832	-4.32166	1.7063e-05	0.000150502	2.4869
GK3P	-0.164916	3.75828	-4.32164	1.70652e-05	0.000150502	2.48678
ANKRD26	-0.11671	5.69394	-4.32157	1.70703e-05	0.000150502	2.4865
MECOM	0.165181	9.07253	4.32031	1.71659e-05	0.000151134	2.48127
PFDN6	-0.0956761	7.31072	-4.32026	1.71702e-05	0.000151134	2.48103
ANXA5	0.121049	10.9567	4.31962	1.7219e-05	0.000151439	2.47838
RBBP4	0.104437	9.073	4.31777	1.73609e-05	0.000152562	2.47069
SGSH	-0.0984881	6.7024	-4.31732	1.73957e-05	0.000152743	2.46881
RAB13	0.0992452	10.7853	4.31393	1.766e-05	0.000154937	2.45468
SS18	0.102936	8.88442	4.31096	1.78943e-05	0.000156864	2.44234
ENTPD6	-0.0825219	7.91307	-4.30916	1.80374e-05	0.000157989	2.43488
ANKRD27	0.0674502	8.51637	4.30868	1.80761e-05	0.000158199	2.43287
IRF2BP1	-0.0885438	6.85875	-4.30458	1.84078e-05	0.00016097	2.41584
WNT10B	-0.112287	6.49512	-4.30389	1.84644e-05	0.000161334	2.41296
NR2F2	0.126621	10.5433	4.30252	1.85762e-05	0.000162179	2.40731
SEC24C	-0.0666152	8.1511	-4.30231	1.85936e-05	0.000162199	2.40643
FAM172A	0.0854054	7.6725	4.29873	1.88914e-05	0.000164662	2.39155
HOXA5	0.120331	9.21897	4.29828	1.89286e-05	0.000164853	2.3897
APTX	0.084043	7.80744	4.29792	1.89589e-05	0.000164975	2.3882
ARHGEF18	0.111554	8.62705	4.29775	1.89734e-05	0.000164975	2.38749
CEBPE	-0.0934552	3.99736	-4.29496	1.92089e-05	0.000166887	2.37594
CLINT1	0.104171	9.99944	4.29369	1.9317e-05	0.00016769	2.37068
KLF11	0.105629	7.58704	4.29322	1.9357e-05	0.000167902	2.36874
FAF2	0.0675373	8.56718	4.29195	1.94661e-05	0.000168711	2.36348
B3GNT2	0.152213	8.50239	4.29127	1.95252e-05	0.000169087	2.36065
FBXO42	-0.0757722	6.70308	-4.29097	1.95509e-05	0.000169173	2.35941
CD47	0.159052	8.72273	4.28943	1.96843e-05	0.00017019	2.35305
BRD7	0.0853767	7.92145	4.28872	1.97465e-05	0.00017059	2.35009
KLHL2	0.103283	7.71214	4.28853	1.97624e-05	0.00017059	2.34934
NME7	0.106558	7.94788	4.28683	1.99119e-05	0.000171742	2.34228
DENND4C	0.0852097	8.71029	4.28569	2.00124e-05	0.00017247	2.33757
SLC35F5	0.120127	8.38625	4.28473	2.0097e-05	0.00017306	2.33362
ZNF80	-0.0931732	4.33023	-4.28453	2.01154e-05	0.000173072	2.33276
CHRNG	-0.0810059	5.68416	-4.28435	2.01306e-05	0.000173072	2.33205
HMGCR	0.116364	7.94392	4.2832	2.02334e-05	0.000173816	2.32728
UBA2	0.101778	8.95679	4.28287	2.02631e-05	0.000173931	2.32591
NSUN3	0.0788235	6.73064	4.28185	2.03543e-05	0.000174574	2.32171
SLC26A6	-0.129393	7.337	-4.27994	2.05264e-05	0.00017591	2.31382
CRTC1	-0.0785592	6.85761	-4.27858	2.06503e-05	0.000176636	2.30819
KCNH4	-0.080717	5.21964	-4.27834	2.06723e-05	0.000176636	2.30719
WDR3	0.0801497	7.07687	4.27831	2.06746e-05	0.000176636	2.30709
STRA13	-0.0843018	9.16915	-4.27828	2.0677e-05	0.000176636	2.30698
CPOX	0.116258	7.37534	4.27693	2.08008e-05	0.000177552	2.30139
RNF167	-0.0914095	8.83689	-4.27411	2.10606e-05	0.000179626	2.28977
FAM21A	0.100846	10.0951	4.27374	2.10948e-05	0.000179776	2.28825
NBR2	-0.115998	6.37533	-4.27255	2.12059e-05	0.000180579	2.28334
BAD	-0.0958879	7.9399	-4.27184	2.12729e-05	0.000181005	2.28039
TPST1	0.148486	7.57134	4.27132	2.13211e-05	0.000181272	2.27827
NAP1L1	0.146338	10.3149	4.27044	2.14039e-05	0.000181701	2.27464
POLRMT	-0.0885549	7.94445	-4.27042	2.14055e-05	0.000181701	2.27457
WNT16	-0.0717653	5.32724	-4.27008	2.14377e-05	0.000181831	2.27316
STK24	0.066647	10.0861	4.26863	2.15751e-05	0.000182667	2.26718
MED4	0.0924192	7.85734	4.26848	2.15895e-05	0.000182667	2.26656
FGF12	-0.167942	4.65871	-4.26848	2.15898e-05	0.000182667	2.26655
YIPF5	0.0956452	8.52089	4.26832	2.16045e-05	0.000182667	2.26591
SLC24A1	0.104436	5.72079	4.26714	2.17172e-05	0.000183476	2.26104
WDR70	0.0822535	7.57899	4.26619	2.18077e-05	0.000184095	2.25715
IK	0.0852672	9.29654	4.26561	2.18636e-05	0.000184422	2.25475
DLL3	-0.088479	5.18425	-4.26541	2.18826e-05	0.000184437	2.25394
UBA3	0.0947934	8.48079	4.2637	2.20485e-05	0.000185689	2.24687
HDAC2	0.0793761	8.14579	4.26239	2.21756e-05	0.000186555	2.24149
CLPB	-0.147463	6.60384	-4.26228	2.21861e-05	0.000186555	2.24105
CRMP1	-0.086659	5.41642	-4.26189	2.22244e-05	0.00018673	2.23943
PPIL6	0.123527	5.36205	4.25978	2.24314e-05	0.000188322	2.23076
FZD6	0.172713	8.52849	4.25868	2.25403e-05	0.000189088	2.22623
CATSPERG	-0.0758854	3.98987	-4.25367	2.30411e-05	0.000193138	2.20566
MAST1	-0.0889044	5.28689	-4.25332	2.30764e-05	0.000193283	2.20423
RPS27A	0.0765365	11.734	4.25302	2.31066e-05	0.000193385	2.20301
DYNC1LI2	0.0848598	10.3812	4.24856	2.35625e-05	0.000197046	2.18473
PCOLCE	-0.157488	8.17832	-4.24801	2.36194e-05	0.000197368	2.18247
ZFAND1	0.0980239	8.06159	4.24784	2.36377e-05	0.000197368	2.18174
DCTD	0.0953735	9.82713	4.24725	2.36991e-05	0.000197651	2.17932
NDEL1	0.0866709	8.24913	4.24715	2.37086e-05	0.000197651	2.17894
FGF21	-0.0711035	3.92129	-4.24496	2.39374e-05	0.000199404	2.16996
NEFH	-0.152304	3.76884	-4.24371	2.40684e-05	0.00020034	2.16485
YTHDF2	0.079505	8.89053	4.24232	2.42158e-05	0.00020141	2.15914
LBR	0.117923	9.43612	4.24208	2.42417e-05	0.000201469	2.15814
AUP1	-0.0791418	9.42095	-4.24144	2.43088e-05	0.00020187	2.15556
TMEM43	0.138079	8.55705	4.24064	2.43948e-05	0.000202428	2.15225
EXPH5	-0.143876	6.41821	-4.24034	2.44263e-05	0.000202533	2.15104
AURKC	-0.0731679	5.09954	-4.23976	2.44882e-05	0.000202888	2.14868
CHSY1	0.145079	8.00364	4.23934	2.45331e-05	0.000203104	2.14696
PDCD4	0.134728	8.77447	4.23874	2.45985e-05	0.000203488	2.14447
PLEKHJ1	-0.0955744	8.69618	-4.23759	2.47222e-05	0.000204353	2.13978
PHB	-0.144362	10.0877	-4.237	2.47859e-05	0.000204723	2.13737
ARHGAP33	-0.0861166	5.78598	-4.2356	2.49383e-05	0.000205822	2.13164
ARCN1	0.065758	9.98963	4.23539	2.49604e-05	0.000205847	2.13081
TM9SF3	0.116902	9.7452	4.23325	2.51956e-05	0.000207626	2.12204
DCTN3	-0.0665349	8.93652	-4.22887	2.56822e-05	0.000211474	2.10415
KIAA0586	-0.0672834	6.30966	-4.22758	2.58272e-05	0.000212504	2.09889
PTPRN2	0.142446	7.62359	4.22555	2.60561e-05	0.000214118	2.09063
SACM1L	0.0843949	9.66907	4.22549	2.60633e-05	0.000214118	2.09038
DHRS3	-0.12495	9.96979	-4.22501	2.61178e-05	0.000214402	2.08842
LUC7L2	0.0919211	9.06237	4.22467	2.61563e-05	0.000214554	2.08704
PAPOLG	0.13212	6.50661	4.22444	2.61835e-05	0.000214613	2.08607
PEX11A	0.101229	7.22488	4.22419	2.62112e-05	0.000214676	2.08508
WEE1	0.130569	8.17512	4.22339	2.63029e-05	0.000215262	2.08182
TAT	-0.10219	3.92754	-4.22318	2.6327e-05	0.000215295	2.08096
CDH3	0.193857	7.88897	4.22198	2.64658e-05	0.000216265	2.07605
ZNF222	0.101038	5.4504	4.22037	2.66517e-05	0.000217543	2.0695
RNF113A	0.0809203	7.97694	4.22025	2.6666e-05	0.000217543	2.069
COX8A	-0.0813368	12.1385	-4.2201	2.6683e-05	0.000217543	2.0684
SCARB2	0.0879643	10.0828	4.21641	2.71147e-05	0.000220808	2.0534
FGF13	0.143284	7.42357	4.21607	2.71555e-05	0.000220808	2.05199
ZNF304	0.0894858	6.78541	4.21603	2.71602e-05	0.000220808	2.05183
CLDN1	0.310554	7.71244	4.21598	2.7166e-05	0.000220808	2.05163
STRN4	-0.0897858	7.96278	-4.21557	2.7215e-05	0.000221039	2.04994
GPATCH8	0.135561	7.95112	4.21525	2.72529e-05	0.000221179	2.04865
ZNF207	0.107504	9.29671	4.21439	2.73548e-05	0.000221727	2.04516
TIMM9	-0.072111	8.02231	-4.21432	2.73628e-05	0.000221727	2.04488
MYLK	0.139492	10.0589	4.21416	2.73823e-05	0.000221727	2.04421
EYA1	-0.0884269	5.80511	-4.21336	2.74779e-05	0.000222332	2.04096
MAD1L1	-0.136779	6.2987	-4.21186	2.76579e-05	0.00022353	2.03485
DCAF17	-0.10154	7.0479	-4.21177	2.76676e-05	0.00022353	2.03452
RPL15	0.0794909	11.9432	4.21108	2.77516e-05	0.00022404	2.03169
GCOM1	0.0883347	8.56807	4.21069	2.77985e-05	0.00022425	2.03011
CAND1	0.0827761	8.2359	4.21043	2.78298e-05	0.000224333	2.02906
VCAM1	0.235002	10.757	4.20969	2.79194e-05	0.000224886	2.02606
OLFML1	-0.16315	6.81972	-4.20579	2.83969e-05	0.000228561	2.0102
HSD17B7	0.0968252	5.8555	4.20556	2.84247e-05	0.000228613	2.00929
NRBP1	-0.105242	7.86913	-4.20458	2.85467e-05	0.000229422	2.00528
CIZ1	-0.0920054	8.16397	-4.20372	2.86529e-05	0.000230103	2.00181
EBF2	-0.116052	3.95265	-4.20261	2.87922e-05	0.000231049	1.99728
KIAA0100	-0.0912315	9.13999	-4.2023	2.88308e-05	0.000231186	1.99603
S100A6	0.132835	11.0956	4.20211	2.88539e-05	0.000231198	1.99528
AGBL3	-0.0825158	3.41268	-4.20166	2.89102e-05	0.000231476	1.99346
GABARAP	-0.0584708	11.8703	-4.20093	2.90022e-05	0.00023204	1.99049
CD1E	-0.139487	5.65128	-4.19876	2.92764e-05	0.000234059	1.98169
PI4KB	-0.0768643	9.18713	-4.19831	2.93343e-05	0.000234347	1.97985
SHMT2	-0.120229	8.22913	-4.19751	2.94353e-05	0.000234978	1.97664
MUTYH	-0.07294	7.43495	-4.1972	2.94759e-05	0.000235127	1.97535
VPS41	0.113672	8.36609	4.19693	2.95093e-05	0.000235219	1.97429
POLR1E	0.127343	6.2283	4.19632	2.95874e-05	0.000235666	1.97182
PTMA	-0.0806396	6.31966	-4.1939	2.98998e-05	0.000237977	1.962
FUT4	0.141469	5.96574	4.19353	2.99478e-05	0.000238183	1.9605
ARPC5	0.178038	10.189	4.1929	3.00294e-05	0.000238306	1.95796
PRDX2	-0.101429	9.92499	-4.19289	3.00304e-05	0.000238306	1.95793
GATA4	-0.0744771	4.64571	-4.19288	3.0032e-05	0.000238306	1.95788
NR1H3	-0.112854	7.02952	-4.19273	3.00522e-05	0.000238306	1.95725
C1orf174	0.0826999	8.50176	4.19234	3.01024e-05	0.000238528	1.95569
EIF4A3	0.0743036	9.81771	4.1913	3.02391e-05	0.000239433	1.95146
PTPN9	-0.0748575	6.84578	-4.19079	3.03051e-05	0.000239768	1.94942
C1orf109	0.0661877	7.36808	4.1906	3.03309e-05	0.000239768	1.94863
ACTG1	0.0900517	12.6946	4.19046	3.03484e-05	0.000239768	1.94809
FAM45A	0.129131	9.21585	4.19017	3.03873e-05	0.000239898	1.94689
NRSN2	-0.0770717	6.69297	-4.18972	3.04466e-05	0.00024019	1.94507
SOX9	0.266696	8.21954	4.18921	3.05129e-05	0.000240536	1.94304
ZSCAN16	0.0925047	6.24491	4.1882	3.06474e-05	0.000241418	1.93893
RCAN3	0.160955	5.22803	4.18738	3.07563e-05	0.000242099	1.93561
NACC2	-0.0720794	6.3052	-4.187	3.08073e-05	0.000242322	1.93407
MBD2	0.0844245	9.02601	4.18453	3.1137e-05	0.000244736	1.92412
NR5A1	-0.0726395	5.60069	-4.18334	3.12985e-05	0.000245772	1.91928
AZIN1	0.104229	8.84078	4.18322	3.13146e-05	0.000245772	1.9188
SYTL2	0.183921	8.61417	4.18292	3.13557e-05	0.000245914	1.91758
GREM1	0.337312	4.33995	4.18239	3.14268e-05	0.000246291	1.91546
TFR2	-0.0986163	4.08168	-4.18215	3.14595e-05	0.000246368	1.91449
NEK11	0.0881085	6.49283	4.18014	3.17338e-05	0.000248334	1.90638
KDM5A	0.122144	7.83349	4.17956	3.18139e-05	0.000248599	1.90402
KIAA0907	0.0960939	9.00424	4.17956	3.1814e-05	0.000248599	1.90402
PIH1D1	-0.0621904	8.99654	-4.17938	3.1839e-05	0.000248613	1.90329
LAT2	-0.101699	6.33246	-4.17727	3.21296e-05	0.000250699	1.8948
TIMM8B	-0.0702332	10.2033	-4.17679	3.21964e-05	0.000251038	1.89286
FUT8	0.128841	7.15787	4.17598	3.23096e-05	0.000251738	1.88958
DLG2	-0.0971943	6.15901	-4.17536	3.23954e-05	0.000252223	1.8871
TCP11	-0.0775635	4.73296	-4.175	3.24465e-05	0.00025228	1.88563
THPO	-0.0730751	5.57462	-4.17497	3.24498e-05	0.00025228	1.88554
S100A7	-0.113384	4.52905	-4.17434	3.25391e-05	0.000252791	1.88297
PICALM	0.13738	10.2069	4.17308	3.27155e-05	0.000253978	1.87792
IFT52	0.0745614	7.65271	4.17205	3.28611e-05	0.000254781	1.87377
2023-03-05	0.0934298	8.33727	4.17202	3.28666e-05	0.000254781	1.87362
VPS13B	0.0921339	8.17273	4.17023	3.31208e-05	0.000256567	1.86642
HUWE1	-0.0799348	8.17028	-4.16924	3.32627e-05	0.00025748	1.86243
ST6GALNAC4	-0.0942159	7.79618	-4.1677	3.34835e-05	0.000259002	1.85625
GUCY1B3	0.122166	8.42517	4.16478	3.39075e-05	0.000262092	1.8445
EHF	0.297531	7.69589	4.16453	3.39447e-05	0.000262191	1.84347
HMOX2	-0.0876486	8.86128	-4.16155	3.43827e-05	0.000265231	1.8315
VEZF1	0.0880234	8.97587	4.16151	3.43877e-05	0.000265231	1.83136
FAIM	0.141868	7.24207	4.16104	3.44583e-05	0.000265584	1.82945
TMEM176A	-0.173274	11.6883	-4.16046	3.45438e-05	0.000266052	1.82713
LCE2B	-0.098977	5.52799	-4.15934	3.47104e-05	0.000267143	1.82264
ARHGDIA	-0.103347	8.93242	-4.15781	3.49399e-05	0.000268717	1.81649
ZNF623	0.0796155	5.94637	4.15761	3.49706e-05	0.00026876	1.81567
KDM4C	0.0738016	7.04097	4.15603	3.52081e-05	0.000270391	1.80935
MCM3	-0.100204	9.1316	-4.15548	3.52916e-05	0.000270839	1.80713
LAMB3	0.175105	5.57069	4.15493	3.53759e-05	0.000271005	1.80491
ULK4	-0.152771	5.0833	-4.15472	3.5408e-05	0.000271005	1.80406
ONECUT2	-0.0712021	3.74997	-4.1546	3.54261e-05	0.000271005	1.80358
RNF103	0.0685057	9.15814	4.15458	3.54291e-05	0.000271005	1.8035
DARS	0.0657104	10.2005	4.15451	3.54397e-05	0.000271005	1.80322
USP4	0.0689027	9.04729	4.15407	3.55063e-05	0.000271192	1.80147
PANK2	0.0984247	7.19098	4.15389	3.55345e-05	0.000271192	1.80073
GTPBP4	0.126778	7.48717	4.15385	3.55401e-05	0.000271192	1.80058
TRIB2	0.168869	8.95505	4.15356	3.55835e-05	0.000271331	1.79944
ZNF750	-0.0932159	4.3442	-4.1533	3.56246e-05	0.000271451	1.79837
SPPL2B	-0.0732324	7.06572	-4.15177	3.58588e-05	0.000273041	1.79225
LSM14A	0.060029	9.58426	4.14974	3.61729e-05	0.000275237	1.78411
TMC6	-0.0753957	7.10008	-4.14942	3.62227e-05	0.000275421	1.78282
RBM12	0.115977	7.22328	4.14647	3.66848e-05	0.000278737	1.77099
SLC2A5	-0.253328	7.79862	-4.14601	3.67564e-05	0.000279083	1.76917
RAB4B	-0.0892815	7.89243	-4.14563	3.68158e-05	0.000279336	1.76766
T	-0.0782618	4.43976	-4.14373	3.71184e-05	0.000281433	1.76002
ZCCHC4	0.0728974	6.32003	4.14352	3.71509e-05	0.00028148	1.7592
CD9	0.141573	9.91319	4.14312	3.72155e-05	0.000281771	1.75758
GFRA3	-0.105906	4.8921	-4.14165	3.74499e-05	0.000282938	1.75172
PPP1R10	-0.083529	7.46111	-4.14148	3.7478e-05	0.000282938	1.75102
CXCL6	0.536592	5.48506	4.14147	3.74795e-05	0.000282938	1.75098
EXOG	0.0961903	6.15608	4.14146	3.74803e-05	0.000282938	1.75096
MLXIPL	-0.15039	7.87106	-4.14133	3.75016e-05	0.000282938	1.75043
AVIL	-0.114469	5.22563	-4.14095	3.75634e-05	0.000283204	1.74889
EZR	0.160147	10.4462	4.14066	3.76089e-05	0.000283348	1.74776
TASP1	0.0806615	6.68616	4.14042	3.76482e-05	0.000283445	1.74679
PHKA1	-0.133254	5.57733	-4.13979	3.77496e-05	0.000284009	1.74428
YBX2	-0.0947246	7.37189	-4.13954	3.77895e-05	0.00028411	1.74329
PBX3	0.137466	7.81475	4.13721	3.81698e-05	0.000286768	1.73395
PPP5C	-0.111404	8.19639	-4.13548	3.84531e-05	0.000288695	1.72704
SOHLH2	-0.115197	4.19912	-4.13471	3.85803e-05	0.000289447	1.72396
PPFIA3	-0.0983313	6.06218	-4.13289	3.88806e-05	0.00029149	1.71673
MED23	0.11475	8.23848	4.13259	3.89311e-05	0.00029149	1.71551
ANO10	-0.0894875	8.185	-4.13257	3.89342e-05	0.00029149	1.71544
HRH2	-0.0813253	4.66865	-4.13218	3.8999e-05	0.000291771	1.71389
CACNA1H	-0.127855	6.57833	-4.13167	3.90849e-05	0.00029221	1.71183
GUCA1A	-0.0703883	6.09169	-4.13117	3.91683e-05	0.00029263	1.70984
MAPK11	-0.0810267	6.5231	-4.13035	3.93056e-05	0.000293451	1.70658
ZNF550	-0.106586	4.71865	-4.13009	3.93491e-05	0.000293472	1.70555
CDYL	0.110218	7.32779	4.13001	3.93631e-05	0.000293472	1.70521
ERCC8	0.0934774	6.90897	4.12916	3.95066e-05	0.000294336	1.70182
SRP54	0.0978097	8.46853	4.12877	3.9573e-05	0.000294437	1.70025
PGS1	0.0778734	7.5779	4.12875	3.95751e-05	0.000294437	1.7002
RAD51AP1	-0.128088	4.76894	-4.12675	3.99155e-05	0.000296764	1.69221
ACOXL	-0.0807205	4.54886	-4.12583	4.00724e-05	0.000297533	1.68855
TPX2	-0.186831	4.66675	-4.12582	4.00743e-05	0.000297533	1.68851
GLUD1	0.155649	11.2832	4.12302	4.05555e-05	0.000300897	1.67737
CD55	0.153643	7.94811	4.12098	4.09116e-05	0.000303329	1.66921
EHMT2	-0.088979	7.12538	-4.1205	4.09944e-05	0.000303732	1.66733
NPR1	-0.110223	7.41002	-4.11793	4.1447e-05	0.000306874	1.65708
FAM60A	0.128842	8.98793	4.11689	4.16312e-05	0.000308025	1.65294
ZNF266	0.140435	7.85097	4.11601	4.17873e-05	0.000308966	1.64945
ADCY8	-0.0799092	3.57664	-4.11584	4.18179e-05	0.00030898	1.64877
CCT5	0.0944073	9.84501	4.11484	4.19958e-05	0.00031008	1.64481
RNASE3	-0.0821608	4.95795	-4.11274	4.23738e-05	0.000312657	1.63645
ATP1B4	-0.187464	4.57533	-4.11225	4.24615e-05	0.000313088	1.63452
TRIM26	-0.0871431	8.33598	-4.11185	4.2534e-05	0.000313407	1.63293
CCNE2	-0.105233	3.84717	-4.10897	4.30591e-05	0.000317058	1.62149
GOLGA7	0.119622	9.59912	4.10839	4.3166e-05	0.000317627	1.61917
PLA2G6	-0.0866339	6.55908	-4.10806	4.32269e-05	0.000317857	1.61786
BBS9	0.07793	6.14373	4.10722	4.33813e-05	0.000318774	1.61453
TSPAN8	0.301219	9.38743	4.10691	4.34376e-05	0.000318969	1.61332
RABAC1	-0.0881285	9.87437	-4.10649	4.35165e-05	0.000319329	1.61163
TIA1	0.135659	8.20233	4.10616	4.35776e-05	0.000319559	1.61032
TPBG	0.219554	7.22871	4.10594	4.36177e-05	0.000319635	1.60946
USP14	0.0736356	8.94479	4.10569	4.36649e-05	0.000319747	1.60845
DAPK1	0.121978	8.87131	4.10539	4.37204e-05	0.000319747	1.60727
SLC39A9	0.0692911	8.4313	4.10538	4.37224e-05	0.000319747	1.60723
PLCH1	0.105965	6.37031	4.09924	4.48785e-05	0.000327977	1.58289
ZFAND5	0.136776	10.0286	4.09898	4.49276e-05	0.000328112	1.58187
ATP4A	-0.0977748	5.30982	-4.09686	4.53329e-05	0.000330847	1.57349
CLIP1	-0.121797	8.50492	-4.09498	4.56961e-05	0.000333271	1.56605
NFKBIE	0.136043	7.1187	4.09426	4.58359e-05	0.000334063	1.5632
F8A1	0.0773398	9.85807	4.09381	4.59246e-05	0.000334482	1.5614
DMWD	-0.0721963	6.31746	-4.08984	4.67046e-05	0.000339866	1.5457
IKBKB	0.137658	7.83531	4.08964	4.67435e-05	0.000339866	1.54492
SEC11A	0.0850523	11.095	4.08956	4.6759e-05	0.000339866	1.54461
PAK7	-0.0945877	4.09513	-4.08936	4.67994e-05	0.000339929	1.54381
SLC7A5P1	0.0822662	3.83376	4.08889	4.6893e-05	0.000340379	1.54194
MFSD6	0.0963305	7.69075	4.08754	4.71619e-05	0.000342099	1.53661
CETN2	0.0798892	10.2481	4.08409	4.78555e-05	0.000346645	1.523
SELT	0.089752	9.87605	4.08401	4.7871e-05	0.000346645	1.5227
ATP6AP2	0.101366	11.1214	4.08394	4.78855e-05	0.000346645	1.52242
MYB	-0.0979842	5.77487	-4.08309	4.80583e-05	0.000347661	1.51906
XRCC5	0.104558	9.82351	4.08192	4.82961e-05	0.000349146	1.51446
E2F4	-0.0606975	7.74404	-4.08065	4.85582e-05	0.000350804	1.50941
ARF6	0.117973	9.27329	4.07969	4.8755e-05	0.000351988	1.50564
NAT6	-0.087633	5.62796	-4.07868	4.89627e-05	0.00035325	1.50168
SNTA1	-0.166525	7.28483	-4.07848	4.90044e-05	0.000353312	1.50089
FBXL15	-0.0757487	7.92974	-4.07712	4.92872e-05	0.000355113	1.49552
OPN3	0.099169	7.98639	4.07534	4.96591e-05	0.000357552	1.48852
KCTD3	0.116099	8.42969	4.07389	4.99646e-05	0.00035951	1.4828
GDAP1L1	-0.101356	6.5205	-4.07287	5.01809e-05	0.00036075	1.47877
TRIM62	-0.0932463	5.6114	-4.07276	5.02046e-05	0.00036075	1.47833
UBE2S	-0.129088	7.43073	-4.0726	5.02378e-05	0.00036075	1.47772
WDR48	0.0931153	8.5265	4.07178	5.04123e-05	0.000361726	1.47449
CST1	-0.0745217	4.08809	-4.07164	5.04418e-05	0.000361726	1.47394
ANXA2P2	0.202772	10.5988	4.07149	5.04749e-05	0.000361726	1.47333
BDKRB1	-0.0954275	4.87678	-4.0707	5.06436e-05	0.000362692	1.47022
PAX3	-0.0667883	6.33741	-4.07002	5.0789e-05	0.000363491	1.46755
ELF3	0.254234	8.84377	4.06841	5.11345e-05	0.000365719	1.46123
RALGAPB	0.093354	8.31186	4.06782	5.12617e-05	0.000366384	1.45892
ANXA2	0.190313	11.4117	4.06686	5.14705e-05	0.000367448	1.45513
RBBP7	0.0806018	8.70598	4.06674	5.14962e-05	0.000367448	1.45466
CAPN6	0.305162	5.99021	4.06666	5.15133e-05	0.000367448	1.45435
DNAI1	-0.0941198	5.71303	-4.06639	5.15724e-05	0.000367624	1.45329
FXYD3	0.150036	6.21788	4.06596	5.16662e-05	0.000368049	1.45159
SERPINB4	-0.0825287	5.95882	-4.06242	5.2443e-05	0.000373334	1.43769
PNMA1	0.0968341	8.84076	4.06176	5.25882e-05	0.000374119	1.43511
ATMIN	0.070506	8.06402	4.0604	5.28901e-05	0.000375979	1.42978
ZNF665	-0.0735782	3.57306	-4.06027	5.29197e-05	0.000375979	1.42926
PCDH7	-0.124309	5.88207	-4.05969	5.30489e-05	0.000376647	1.42698
HIST1H2BI	-0.105618	3.65075	-4.05922	5.31534e-05	0.00037714	1.42515
NADK	-0.0774819	7.86464	-4.05825	5.33727e-05	0.000378445	1.42131
C1RL	0.194187	7.68866	4.05656	5.37516e-05	0.00038088	1.41472
TSSK2	-0.067806	5.35734	-4.05506	5.40932e-05	0.000383047	1.40882
RPL7	0.0769948	10.2743	4.05439	5.4245e-05	0.000383868	1.40621
CENPO	-0.0776643	5.13747	-4.05151	5.49067e-05	0.000388295	1.39492
CAP1	0.124418	9.95145	4.04929	5.54208e-05	0.000391672	1.38624
BAIAP2L2	-0.15914	6.94333	-4.04837	5.56356e-05	0.00039279	1.38263
TRAF6	0.0619974	6.5869	4.0483	5.56523e-05	0.00039279	1.38235
SHBG	-0.131356	6.0988	-4.04755	5.5829e-05	0.000393778	1.3794
ATP5I	-0.0839827	11.375	-4.04514	5.63959e-05	0.000397515	1.36999
BNIP2	0.128943	7.36696	4.04412	5.66376e-05	0.000398957	1.36601
ACTR1B	-0.0719193	8.53826	-4.04347	5.6792e-05	0.000399529	1.36347
MOCS3	-0.083356	6.30308	-4.04347	5.67934e-05	0.000399529	1.36345
TRAF3	0.112671	7.67586	4.0428	5.69518e-05	0.00040038	1.36085
DOCK6	-0.108104	7.32951	-4.04236	5.70572e-05	0.000400859	1.35913
MAP1A	-0.096936	6.24376	-4.04167	5.72242e-05	0.000401769	1.35641
DAB1	-0.109086	4.65752	-4.0398	5.76749e-05	0.000404668	1.3491
SOX2	-0.0975982	5.70587	-4.03767	5.81904e-05	0.000408018	1.34082
OR7C1	-0.0596012	3.30035	-4.03701	5.83524e-05	0.000408886	1.33823
ZSCAN18	0.0978126	8.7203	4.03658	5.84588e-05	0.000409365	1.33653
MRPL20	-0.211993	10.6478	-4.03582	5.86451e-05	0.000410401	1.33357
DBP	-0.153259	7.19313	-4.03472	5.89151e-05	0.000412021	1.32929
HSD3B2	-0.102009	3.90763	-4.03336	5.92518e-05	0.000414106	1.32399
IKBKAP	0.0571553	7.41018	4.03286	5.93755e-05	0.000414439	1.32204
UBE2C	-0.148801	6.48432	-4.03286	5.93768e-05	0.000414439	1.32202
DYNC1I2	0.0681186	10.8234	4.03243	5.94837e-05	0.000414915	1.32035
CDSN	-0.0950969	4.29658	-4.03184	5.96292e-05	0.00041566	1.31807
ARHGEF10	0.103617	7.25775	4.0312	5.97904e-05	0.000416254	1.31556
UBE2A	0.0848239	9.49126	4.03119	5.97921e-05	0.000416254	1.31553
RGSL1	-0.0828239	4.65442	-4.03072	5.991e-05	0.000416804	1.3137
TMEM30B	0.160198	6.71727	4.03036	6.00011e-05	0.000417167	1.31229
CPA3	0.390583	6.17626	4.03003	6.00822e-05	0.000417301	1.31103
SNX1	-0.0883806	9.04595	-4.02997	6.00982e-05	0.000417301	1.31078
YARS	-0.0645521	8.5858	-4.02866	6.04295e-05	0.000419068	1.30566
MAPRE1	0.0751364	9.82632	4.02855	6.0457e-05	0.000419068	1.30524
REG1B	-0.10913	4.18145	-4.0285	6.047e-05	0.000419068	1.30504
SLC36A1	-0.0801295	7.21786	-4.02722	6.07934e-05	0.000421038	1.30007
RNF122	-0.0781427	5.35313	-4.02705	6.08361e-05	0.000421061	1.29942
APP	0.119446	11.9351	4.02664	6.09424e-05	0.000421525	1.29779
PEX11B	0.0684355	9.05595	4.02604	6.10936e-05	0.000422298	1.29549
SCML2	-0.0691905	5.32363	-4.02444	6.15049e-05	0.000424824	1.28924
TAAR5	-0.0717943	3.5253	-4.02431	6.15382e-05	0.000424824	1.28873
MAST3	-0.101667	8.11416	-4.02392	6.16386e-05	0.000425243	1.28722
NKIRAS2	-0.0740812	7.8452	-4.02364	6.17109e-05	0.000425468	1.28613
ALX4	-0.0736304	5.95359	-4.02292	6.18972e-05	0.000426478	1.28332
TAOK1	0.202192	6.05405	4.02269	6.19554e-05	0.000426556	1.28245
CCDC92	-0.0650686	9.1888	-4.02257	6.19881e-05	0.000426556	1.28195
ATP13A1	-0.08075	8.25618	-4.02235	6.20429e-05	0.000426659	1.28113
COPA	-0.0852718	8.59248	-4.02179	6.21889e-05	0.000427389	1.27894
SNRPA1	0.0912603	8.66807	4.02144	6.22813e-05	0.00042775	1.27756
CORO1C	0.108257	9.14559	4.02107	6.23774e-05	0.000428104	1.27613
NSMCE4A	0.0945331	8.64351	4.02093	6.24127e-05	0.000428104	1.2756
DKK2	-0.102487	3.75149	-4.01961	6.27592e-05	0.000430206	1.27045
ERCC5	0.0883952	8.43035	4.01891	6.29429e-05	0.000431189	1.26773
ZXDB	0.0943455	4.90638	4.01862	6.30178e-05	0.000431296	1.26662
CASP6	0.102793	7.95487	4.01854	6.3039e-05	0.000431296	1.26631
FBXW4	-0.0658946	8.67412	-4.01836	6.30873e-05	0.000431351	1.26559
IQCA1	0.168098	6.84232	4.01672	6.35188e-05	0.000434025	1.25925
ZFPL1	-0.0830637	7.04111	-4.01559	6.38195e-05	0.000435802	1.25485
KLF10	0.158309	9.26928	4.01392	6.4267e-05	0.000438578	1.24835
CACNB1	-0.139611	5.5667	-4.0137	6.43253e-05	0.000438697	1.24751
VAMP2	-0.106798	7.99128	-4.01277	6.45753e-05	0.000440122	1.24389
XYLB	-0.112777	5.80888	-4.01155	6.49042e-05	0.000442083	1.23917
RALA	0.0772124	8.78715	4.01118	6.50046e-05	0.000442485	1.23773
GPM6B	0.243785	5.49938	4.00855	6.57206e-05	0.000447075	1.22753
AKAP7	0.0899724	7.38369	4.00832	6.57846e-05	0.000447227	1.22663
ASCC1	0.0846565	7.77515	4.0081	6.58424e-05	0.000447336	1.22581
CCHCR1	-0.0691424	6.91324	-4.007	6.61472e-05	0.000449122	1.22151
TCF25	0.0745867	9.59371	4.0046	6.68088e-05	0.000453327	1.21225
ZDHHC3	0.0686045	7.85067	4.00421	6.69189e-05	0.000453787	1.21072
CAPRIN2	0.0753114	8.31068	4.00369	6.70641e-05	0.000454484	1.2087
NFE2L3	0.249893	5.36744	4.00171	6.76181e-05	0.000457949	1.20105
PPL	0.170023	8.01287	4.00143	6.76961e-05	0.000458188	1.19998
TARS	-0.0736124	10.7861	-3.9981	6.86405e-05	0.000464287	1.18709
TSKS	-0.0790506	4.3301	-3.99779	6.87294e-05	0.000464595	1.18588
NUBPL	0.10097	7.89272	3.99719	6.89015e-05	0.000465465	1.18356
UPF3A	0.129619	8.13725	3.99653	6.90893e-05	0.00046644	1.18102
CABP1	-0.171278	5.85261	-3.99574	6.93167e-05	0.000467467	1.17797
SNW1	0.109025	8.96378	3.9957	6.93287e-05	0.000467467	1.17781
NTRK1	-0.12295	4.66257	-3.99529	6.94477e-05	0.000467976	1.17621
CDC25C	-0.0729713	3.62295	-3.99446	6.96866e-05	0.00046929	1.17302
PRKAA1	0.0878818	6.5885	3.99319	7.00541e-05	0.000471469	1.16812
RNF220	-0.0955292	7.9182	-3.99273	7.01883e-05	0.000471908	1.16634
CACNB3	-0.0978647	5.4817	-3.99259	7.02309e-05	0.000471908	1.16578
MOGAT2	-0.0726103	6.06442	-3.99252	7.02514e-05	0.000471908	1.16551
DYNC2LI1	0.110466	9.2945	3.99211	7.0371e-05	0.000472173	1.16392
PLAC4	-0.0668502	5.28522	-3.99208	7.0379e-05	0.000472173	1.16382
PHLPP1	-0.074614	6.23238	-3.99061	7.08092e-05	0.000474763	1.15815
NPTX1	-0.0726578	5.38944	-3.99036	7.08832e-05	0.000474767	1.15718
LDB2	0.140789	8.3581	3.99031	7.08984e-05	0.000474767	1.15698
COQ4	-0.108407	8.44394	-3.99	7.09872e-05	0.000474856	1.15582
YTHDF1	0.0921055	8.45081	3.98996	7.10003e-05	0.000474856	1.15564
INSIG2	0.0818896	8.24702	3.98824	7.15098e-05	0.000477965	1.14899
FADS3	-0.102889	8.00453	-3.98743	7.17492e-05	0.000479267	1.14588
FOLR3	-0.0910323	6.04605	-3.9856	7.22952e-05	0.000482613	1.13883
ETV7	-0.134664	5.93221	-3.98534	7.23748e-05	0.000482844	1.13781
HTR1B	-0.0618257	4.0617	-3.98504	7.24649e-05	0.000483144	1.13665
VGF	-0.137244	4.76362	-3.98435	7.26723e-05	0.000484226	1.13399
TRPC4AP	-0.0776077	7.91508	-3.9832	7.30169e-05	0.00048622	1.12959
HOXB5	0.164422	6.97182	3.98264	7.31862e-05	0.000487033	1.12744
NCOA6	0.0963111	8.04431	3.98237	7.32683e-05	0.000487033	1.1264
HNRNPK	0.0688314	11.3946	3.98235	7.32752e-05	0.000487033	1.12631
EFTUD1	0.0855339	6.55328	3.98102	7.36802e-05	0.000489421	1.12118
SMAD1	0.110356	8.97887	3.98069	7.37799e-05	0.000489703	1.11993
CREM	0.115738	7.87638	3.98058	7.3814e-05	0.000489703	1.1195
UCN	-0.0673664	5.04836	-3.97925	7.42215e-05	0.000492102	1.11438
ANKHD1	0.0984188	9.22916	3.97857	7.44309e-05	0.000493185	1.11176
GABRR2	-0.0771301	4.3697	-3.97831	7.45123e-05	0.00049342	1.11074
ZNF41	-0.105614	5.48462	-3.97766	7.47104e-05	0.000494426	1.10827
CHRNA2	-0.0823052	5.8273	-3.97724	7.48418e-05	0.00049499	1.10664
F9	-0.0992595	4.17049	-3.97613	7.51871e-05	0.000496967	1.10236
TP53BP2	0.102813	7.88574	3.97455	7.56802e-05	0.000499918	1.09628
STBD1	-0.171299	6.36622	-3.97226	7.63994e-05	0.000504359	1.08749
KDM3A	0.0883936	8.38515	3.97179	7.65474e-05	0.000505024	1.08569
CUL5	-0.0865344	9.04969	-3.97072	7.68868e-05	0.000506952	1.08157
PSMD6	0.0627718	9.24458	3.97053	7.69472e-05	0.000507038	1.08084
WHSC1L1	-0.0657386	8.75497	-3.96999	7.71176e-05	0.000507849	1.07879
ABCA2	0.0987772	5.79965	3.96938	7.73126e-05	0.00050882	1.07644
PTPN14	-0.10728	4.86044	-3.96696	7.8091e-05	0.000513628	1.06713
CLDN6	-0.111377	5.46011	-3.96575	7.84818e-05	0.000515882	1.06249
GRINA	-0.113805	9.53357	-3.96457	7.88651e-05	0.000518084	1.05796
NAGPA	-0.0576033	7.50186	-3.96389	7.9085e-05	0.000518937	1.05537
KIF13A	-0.0891359	5.79688	-3.96387	7.90918e-05	0.000518937	1.05529
FRMD8	0.068663	7.10007	3.96368	7.91542e-05	0.000519029	1.05455
LAMP2	0.109714	9.62591	3.96289	7.94127e-05	0.000520406	1.05152
PAFAH1B2	0.0661158	9.15194	3.96254	7.95258e-05	0.000520828	1.0502
LRRC1	0.106452	7.5146	3.96141	7.98981e-05	0.000522641	1.04586
RASL12	-0.094016	5.74312	-3.9614	7.99e-05	0.000522641	1.04584
PSMD10	0.0906093	8.74445	3.9597	8.04643e-05	0.00052576	1.0393
SIDT2	-0.0640149	8.09216	-3.95959	8.0498e-05	0.00052576	1.03891
TNFRSF4	-0.101998	5.87851	-3.95952	8.0524e-05	0.00052576	1.03861
ATG3	0.0823115	10.2998	3.95869	8.07981e-05	0.000527229	1.03545
RAB3A	-0.0756651	7.08787	-3.95781	8.10927e-05	0.000528829	1.03207
SOX1	-0.0688576	3.94313	-3.95739	8.12336e-05	0.000529426	1.03045
ADCK4	-0.0785407	7.58444	-3.95714	8.13173e-05	0.00052965	1.02949
AHDC1	-0.0773732	6.37066	-3.95653	8.15223e-05	0.000530662	1.02716
HOXD10	0.189773	8.49609	3.95561	8.18312e-05	0.00053235	1.02364
POLR3C	0.0697899	7.05987	3.95453	8.21947e-05	0.00053439	1.01952
VPS39	-0.0698764	8.48363	-3.95195	8.30738e-05	0.000539778	1.00964
EDA	-0.0682871	5.77982	-3.95004	8.37259e-05	0.000543686	1.00237
SEC13	-0.0689192	10.0322	-3.94929	8.39847e-05	0.000545036	0.999501
OSBP2	-0.0935261	8.63226	-3.94865	8.42081e-05	0.000546155	0.997033
SMAD6	0.115722	7.06574	3.94799	8.44357e-05	0.000547301	0.994524
MCOLN1	-0.0925557	7.66174	-3.94613	8.5083e-05	0.000551163	0.987429
PPP1CC	0.0745666	10.5621	3.94579	8.52025e-05	0.000551604	0.986124
PI4K2A	-0.0757987	7.63165	-3.94544	8.53264e-05	0.000552073	0.984774
KCNK1	0.165269	7.71107	3.94452	8.56477e-05	0.000553794	0.981282
AASS	-0.189009	8.18453	-3.94439	8.56958e-05	0.000553794	0.98076
ZNF200	0.109679	6.34315	3.94421	8.57583e-05	0.000553864	0.980083
SLC7A11	-0.0672827	6.54269	-3.94192	8.65659e-05	0.000558744	0.971375
TXNIP	0.129789	11.8436	3.94135	8.67718e-05	0.000559735	0.969168
DMPK	-0.126922	7.65684	-3.94037	8.71198e-05	0.000561643	0.965449
EIF3C	-0.0889392	10.9589	-3.93867	8.77307e-05	0.000565241	0.958958
NIT1	-0.134762	8.06597	-3.93416	8.93673e-05	0.000575366	0.941789
SNX3	0.096032	11.0366	3.93404	8.94096e-05	0.000575366	0.941349
VPS26A	0.0749312	7.91258	3.93353	8.95969e-05	0.000576226	0.939405
ARL4A	0.103224	8.00422	3.93307	8.97679e-05	0.000576979	0.937634
CD5L	-0.145226	5.19911	-3.93262	8.99331e-05	0.000577547	0.935926
MORF4L1	0.0729096	11.8347	3.93254	8.9964e-05	0.000577547	0.935607
ADAMTS1	0.241924	8.96682	3.93232	9.0042e-05	0.000577702	0.934802
SEC24B	0.0756239	8.667	3.93217	9.00977e-05	0.000577714	0.934227
SLCO3A1	0.166736	6.86607	3.93183	9.02238e-05	0.000578177	0.932929
NSUN5	-0.0750716	7.41121	-3.93115	9.04769e-05	0.000579452	0.930326
C4BPB	-0.0780623	6.75035	-3.93045	9.0736e-05	0.000580765	0.927671
MED25	-0.0815822	8.06307	-3.9302	9.08299e-05	0.000581019	0.92671
NAA35	0.068051	7.20156	3.9269	9.20619e-05	0.000588549	0.914197
LANCL1	0.068563	9.56693	3.92422	9.30784e-05	0.000594692	0.904
COL5A3	-0.089328	5.71517	-3.92396	9.31774e-05	0.00059497	0.903012
SPAM1	-0.116812	4.76041	-3.92333	9.34164e-05	0.000595595	0.900634
IPCEF1	0.147484	6.0573	3.92329	9.34329e-05	0.000595595	0.90047
SLC23A2	0.100724	6.60614	3.92309	9.35095e-05	0.000595595	0.899709
CLCN7	-0.0762662	8.80775	-3.92297	9.35569e-05	0.000595595	0.899239
SIGLEC6	-0.119805	3.66364	-3.92283	9.36078e-05	0.000595595	0.898733
SRRM1	0.078419	9.6848	3.92269	9.3663e-05	0.000595595	0.898186
NT5DC2	-0.127601	6.55838	-3.92269	9.36642e-05	0.000595595	0.898174
ABCA5	0.104578	8.10732	3.92172	9.40361e-05	0.000597606	0.894494
MAP3K11	-0.0966173	7.59193	-3.92149	9.41237e-05	0.000597808	0.89363
EPN3	-0.0943114	7.48439	-3.92085	9.4371e-05	0.000599024	0.891193
EGR4	-0.0736801	4.5025	-3.92042	9.4534e-05	0.000599703	0.889591
MAPK8IP2	-0.103512	5.49489	-3.92027	9.4592e-05	0.000599717	0.889021
INF2	-0.0661025	7.84091	-3.91899	9.50894e-05	0.000601795	0.884151
KIAA0319	-0.077039	4.20459	-3.91897	9.5095e-05	0.000601795	0.884097
KCNQ4	-0.0716404	4.39465	-3.91896	9.50996e-05	0.000601795	0.884052
LY6G6C	-0.0816996	5.90138	-3.91885	9.51443e-05	0.000601795	0.883615
HSF1	-0.0903406	7.91996	-3.91718	9.57926e-05	0.000605538	0.87731
PHF2	0.0911497	7.53499	3.91599	9.626e-05	0.000608134	0.872791
TM2D1	0.0954454	8.14415	3.91584	9.63189e-05	0.000608148	0.872224
DBF4B	-0.0744659	5.8647	-3.91541	9.64888e-05	0.000608862	0.870587
CST2	-0.0679808	5.54371	-3.91502	9.66437e-05	0.000609481	0.869098
C2CD2L	-0.0736855	8.03823	-3.91414	9.69898e-05	0.000611204	0.865779
RPL3	0.0640819	12.5779	3.91404	9.70309e-05	0.000611204	0.865385
UBE2E1	0.0925642	9.80179	3.91332	9.73151e-05	0.000611769	0.862671
MOCOS	0.148819	4.97401	3.91328	9.73307e-05	0.000611769	0.862521
YIPF6	0.0551703	8.87611	3.91324	9.73471e-05	0.000611769	0.862365
FOSL2	0.194935	7.89127	3.91324	9.73489e-05	0.000611769	0.862348
MADCAM1	-0.0655166	6.29988	-3.91194	9.78664e-05	0.00061466	0.857426
SLC30A5	0.0988545	7.91872	3.91161	9.79973e-05	0.000615123	0.856185
CNGA1	0.134737	4.31261	3.90904	9.90301e-05	0.000621242	0.846453
SIN3B	0.109035	7.86015	3.90883	9.91137e-05	0.000621402	0.84567
SASH1	0.121772	9.37968	3.90829	9.93313e-05	0.000622402	0.843634
HAAO	-0.142302	6.89349	-3.90812	9.94019e-05	0.000622481	0.842974
RUFY3	0.0996966	8.69537	3.90568	0.000100394	0.000628326	0.833757
CXCL1	0.358329	6.50664	3.90168	0.000102039	0.00063821	0.81867
ASTE1	0.0720329	6.50114	3.90156	0.000102092	0.00063821	0.818187
NIF3L1	0.0545173	8.22714	3.90122	0.000102234	0.000638353	0.816903
NR1I3	-0.260535	6.00459	-3.90122	0.000102234	0.000638353	0.816898
CMPK1	0.0795477	9.85879	3.90104	0.000102308	0.000638439	0.816232
WDR5B	0.0781667	6.38725	3.90009	0.000102705	0.000640237	0.812637
TUBGCP2	-0.0930335	7.32092	-3.90006	0.000102715	0.000640237	0.812543
UBTD1	-0.0814201	6.90656	-3.89916	0.000103094	0.000642227	0.809124
DIDO1	0.095806	6.91701	3.89686	0.000104062	0.00064788	0.800451
TMEM204	-0.0798584	7.31934	-3.89577	0.000104524	0.000650378	0.796342
PITPNA	0.079459	8.87025	3.89501	0.000104847	0.000652007	0.793482
FUZ	-0.142593	7.62239	-3.89267	0.000105847	0.000657848	0.784668
NEUROD2	-0.0609573	5.24447	-3.8915	0.00010635	0.000660102	0.780269
NPFFR1	-0.074955	5.15152	-3.89146	0.000106369	0.000660102	0.780109
TNFAIP8	0.213328	7.6128	3.89138	0.000106402	0.000660102	0.779816
MPG	-0.0785897	7.96657	-3.89126	0.000106456	0.000660102	0.779345
FBXO24	-0.0711007	6.30507	-3.89061	0.000106736	0.000660725	0.776911
ZNF253	-0.0922361	6.1001	-3.89053	0.000106772	0.000660725	0.7766
SCN8A	-0.067526	4.51419	-3.89047	0.000106798	0.000660725	0.776372
BAP1	-0.0707881	6.87012	-3.89045	0.000106803	0.000660725	0.776326
NDFIP1	0.0564743	11.2125	3.88901	0.00010743	0.000664218	0.770899
STMN1	0.117288	9.62769	3.88886	0.000107494	0.000664235	0.77034
MGAT1	-0.075674	8.67502	-3.88859	0.000107616	0.0006646	0.769295
PDE6G	-0.0813546	6.01736	-3.88816	0.000107803	0.000665374	0.767681
CD226	-0.0724052	4.41911	-3.88767	0.000108015	0.0006663	0.765857
PAX6	-0.0643025	5.48733	-3.88684	0.00010838	0.000668166	0.762729
SF3B3	-0.074864	7.86588	-3.88585	0.000108817	0.000670475	0.758995
ELAC1	0.0773702	6.28473	3.88467	0.000109336	0.000673288	0.754578
CPA1	-0.0745875	4.84128	-3.88451	0.000109409	0.000673348	0.753963
UBE2E3	0.0678576	10.3692	3.88429	0.000109509	0.000673576	0.753117
CEP135	-0.121259	7.42972	-3.88327	0.000109962	0.000675943	0.749288
HDGF	0.0826391	10.1161	3.88312	0.000110027	0.000675943	0.748733
MLPH	-0.104134	5.91626	-3.88285	0.000110146	0.000675943	0.747732
ABHD8	-0.0770904	6.92756	-3.88283	0.000110158	0.000675943	0.747636
RNF170	0.0912243	6.21226	3.88271	0.000110209	0.000675943	0.747205
FAM3A	-0.0854887	8.27664	-3.88173	0.000110651	0.000678267	0.743491
TM9SF2	0.10506	10.8404	3.8813	0.000110842	0.000679053	0.741887
NPM1	0.0704931	12.1997	3.8811	0.000110929	0.000679197	0.74116
PPT1	0.0930586	9.79937	3.88016	0.000111354	0.00068141	0.737612
LHB	-0.0726963	8.08679	-3.87967	0.000111576	0.000682374	0.735771
IVL	-0.0720303	3.98736	-3.87834	0.000112179	0.000685676	0.730766
SPRY4	-0.101817	7.03543	-3.87785	0.000112402	0.000686645	0.728926
MVK	-0.085167	7.88753	-3.87744	0.000112589	0.000687398	0.727382
TMCO1	0.0672035	10.1046	3.87686	0.000112853	0.000688613	0.725215
FBXW2	0.0785429	8.05113	3.87652	0.000113006	0.000689158	0.723954
MTSS1L	-0.0897355	5.48008	-3.87622	0.000113144	0.000689606	0.722825
RALGPS1	0.109672	6.96986	3.87522	0.000113602	0.000692005	0.719077
LGI1	-0.0895083	3.36967	-3.87397	0.00011418	0.000695132	0.714368
LCMT2	0.0815035	6.89749	3.87343	0.000114426	0.000696233	0.712373
KLHL21	-0.0989514	7.82219	-3.87255	0.000114834	0.00069832	0.709071
MLX	-0.12072	8.83285	-3.8723	0.000114954	0.000698652	0.708106
YIPF1	0.067837	8.98516	3.87207	0.000115057	0.00069888	0.707276
ISCA1	0.0841422	9.28253	3.87074	0.000115678	0.000702064	0.702284
CXXC1	-0.0763454	7.82037	-3.87067	0.000115712	0.000702064	0.702011
DCTN2	-0.0717615	8.72322	-3.87031	0.00011588	0.000702684	0.700667
GJC2	-0.0757268	6.43778	-3.8693	0.000116354	0.00070516	0.696882
MR1	0.099133	6.50377	3.86816	0.00011689	0.000708012	0.692615
HBQ1	-0.0784455	5.19667	-3.86799	0.00011697	0.000708093	0.691986
PKD2L1	-0.0650051	5.09435	-3.86672	0.000117573	0.000711341	0.687217
SIK1	0.161313	7.07812	3.86608	0.000117879	0.00071279	0.684808
FRAS1	0.148266	8.76993	3.86585	0.000117985	0.000713032	0.683971
WFDC8	-0.108508	4.09523	-3.86538	0.000118208	0.000713977	0.68222
ENDOG	-0.128482	8.12563	-3.86471	0.000118531	0.000715526	0.679688
RLIM	0.070803	9.70888	3.86327	0.000119223	0.000719297	0.674293
CREB3	-0.0728218	8.23326	-3.86261	0.000119537	0.000720784	0.671856
ARHGEF3	0.0992679	8.66266	3.86148	0.000120083	0.000723669	0.667632
PCMTD2	0.076616	8.70234	3.86061	0.000120505	0.000725803	0.66438
CCNH	0.0689677	8.57293	3.86	0.000120805	0.000727202	0.662075
ZNF580	-0.0963261	7.77204	-3.85985	0.000120877	0.000727228	0.661521
MFSD11	0.0783974	6.9502	3.85841	0.000121581	0.000731057	0.656133
ZNF221	-0.0558727	2.83052	-3.85629	0.00012262	0.000736891	0.648244
FSCN2	-0.0730244	4.05317	-3.85552	0.000123002	0.000738769	0.645366
CCL11	-0.245553	6.13324	-3.85462	0.000123447	0.00074103	0.642013
VASH2	-0.102544	5.21436	-3.85291	0.000124304	0.000745756	0.635602
PIK3IP1	0.128761	7.97459	3.85228	0.000124617	0.000747215	0.633272
MOSPD1	0.0817502	7.23232	3.85189	0.000124813	0.000747972	0.631816
GRAP2	-0.0667743	5.93329	-3.85172	0.000124898	0.00074805	0.631188
BTG3	0.120197	8.16415	3.85159	0.000124966	0.00074805	0.630683
ESPL1	-0.225164	6.48338	-3.84908	0.000126231	0.000755205	0.621342
ARNTL	0.144371	6.19605	3.8485	0.000126525	0.000756542	0.619186
F2	-0.0953574	6.13868	-3.84813	0.000126714	0.000757248	0.617805
NEK4	0.0844305	7.60921	3.84792	0.000126821	0.000757463	0.617025
FDFT1	0.0783723	9.67155	3.84765	0.000126963	0.000757888	0.61599
CSAG2	-0.0757245	4.62872	-3.84699	0.000127295	0.000759449	0.613566
LTK	-0.0840364	5.9761	-3.84648	0.000127558	0.000760593	0.611655
IMPACT	0.0833199	6.56523	3.84621	0.000127696	0.000760992	0.610654
RPS8	0.0750901	12.1993	3.84469	0.000128482	0.000765251	0.604967
HTR4	-0.0719116	5.02287	-3.84441	0.000128624	0.000765446	0.603942
PDLIM2	-0.0894189	8.35021	-3.84435	0.000128657	0.000765446	0.603702
RNF19B	-0.103113	7.38274	-3.84281	0.000129454	0.00076902	0.59798
POLDIP2	-0.0990514	9.03203	-3.8428	0.000129456	0.00076902	0.597968
MAPK14	0.0768865	8.24648	3.84277	0.000129473	0.00076902	0.597844
AKAP13	0.12595	8.91475	3.84113	0.000130331	0.000773687	0.591724
PFKFB3	0.264879	9.22642	3.83902	0.000131439	0.000779831	0.583882
SOCS5	0.0923968	8.069	3.83869	0.000131611	0.000780405	0.582665
FGF6	-0.0715549	5.08021	-3.83856	0.000131681	0.000780405	0.582176
FZD1	0.0982625	8.50982	3.83832	0.000131806	0.000780713	0.581298
NCSTN	-0.0650584	8.73674	-3.83704	0.000132488	0.000784319	0.576517
WDR61	0.0782583	9.27988	3.83622	0.00013292	0.000786443	0.573499
PDE3A	-0.0830579	4.79339	-3.83504	0.000133552	0.00078967	0.569102
C17orf75	0.0936215	6.28432	3.83493	0.000133613	0.00078967	0.568683
COASY	-0.0996803	8.22325	-3.83451	0.000133838	0.000790567	0.567121
ALG9	0.0756523	7.05694	3.8339	0.000134162	0.000792045	0.56488
IL13RA1	0.12796	8.68903	3.83361	0.00013432	0.000792538	0.563794
LITAF	0.127378	10.037	3.83333	0.000134467	0.000792973	0.562776
RGS6	-0.0753998	5.81069	-3.8327	0.000134808	0.000794547	0.560429
ENOPH1	0.0712919	9.21874	3.83203	0.000135175	0.000796269	0.557915
WTAP	0.107841	8.99743	3.83172	0.000135343	0.00079682	0.556765
MAP2K2	-0.0816503	8.37517	-3.83141	0.000135508	0.000797356	0.555633
RRAS2	-0.109441	8.94663	-3.83094	0.000135762	0.000798182	0.553898
RHOA	0.129344	11.8934	3.83088	0.000135797	0.000798182	0.553658
PPFIA1	0.0895381	8.53117	3.82981	0.000136378	0.000800915	0.549706
NXT2	0.109523	5.67482	3.82972	0.000136429	0.000800915	0.549357
ATP6V0A1	-0.107374	8.4982	-3.82961	0.000136486	0.000800915	0.548969
NGLY1	0.0715686	7.98127	3.82895	0.000136847	0.000802592	0.546524
WDYHV1	0.0965564	7.4875	3.82763	0.000137575	0.000806195	0.541613
PCDHGA9	-0.061354	5.25114	-3.82756	0.000137612	0.000806195	0.541363
BICD1	0.136092	5.97208	3.82689	0.00013798	0.000807648	0.538886
PCMT1	0.0847838	9.61871	3.82684	0.000138011	0.000807648	0.538683
TBC1D10B	-0.0747567	7.23842	-3.82647	0.000138216	0.000808409	0.537305
RPL29	-0.0626363	12.6801	-3.82605	0.000138449	0.000809332	0.535743
MATN4	-0.0654939	5.22159	-3.82546	0.000138773	0.00081078	0.533583
SORBS2	0.0999624	8.79391	3.82527	0.000138879	0.000810959	0.532873
EPB42	-0.0778166	4.08736	-3.82512	0.00013896	0.000810993	0.53233
GPN2	-0.071089	6.52142	-3.82478	0.000139153	0.000811673	0.53105
TTC39A	0.189859	6.74755	3.82427	0.000139433	0.000812867	0.529185
DPF3	-0.158419	5.96764	-3.82393	0.000139625	0.000813545	0.527909
KLK14	-0.0674691	5.47438	-3.82359	0.000139818	0.000814223	0.526634
NES	-0.151554	8.00767	-3.82326	0.000140002	0.000814855	0.525412
ZNF76	-0.0645524	7.23949	-3.8231	0.00014009	0.000814922	0.524834
SELENBP1	-0.170857	9.26353	-3.82245	0.000140454	0.000816598	0.522429
C14orf166	0.0582723	10.3996	3.82224	0.000140573	0.000816845	0.521646
ZNRF4	-0.0676902	5.58216	-3.82193	0.000140747	0.000817416	0.520498
PAK4	-0.0916191	10.2397	-3.82104	0.00014125	0.000819891	0.517196
NEK9	0.0750811	7.83674	3.82072	0.000141428	0.000820484	0.516026
TP63	-0.15132	4.51503	-3.82017	0.000141742	0.000821858	0.513974
LRRTM2	-0.0880471	3.42909	-3.81988	0.000141904	0.00082235	0.51292
TPD52L1	0.147539	8.83891	3.81922	0.000142279	0.00082408	0.510473
RBM5	0.117342	9.21109	3.8176	0.000143201	0.000828972	0.504492
DLEC1	-0.0757985	4.4513	-3.81697	0.000143564	0.000830628	0.502144
QTRTD1	0.0780794	5.3653	3.81595	0.000144146	0.000833383	0.498401
RBM17	0.08908	9.13109	3.81587	0.000144196	0.000833383	0.498078
XPOT	0.0864871	8.6909	3.81458	0.000144935	0.000837205	0.493343
DYSF	-0.123966	7.44738	-3.81307	0.000145814	0.000841827	0.487747
YLPM1	0.0871388	7.65923	3.81282	0.000145961	0.000842219	0.486817
WNT8B	-0.0855059	3.65579	-3.81165	0.000146642	0.000845693	0.482507
RAP1A	0.100141	9.20466	3.81085	0.000147108	0.000847929	0.479564
SNRPB	-0.100122	9.81476	-3.80971	0.000147781	0.00085135	0.475339
VGLL1	-0.115441	5.43283	-3.80883	0.000148298	0.000853871	0.472105
NR2C2	0.0801175	8.54657	3.80865	0.000148408	0.000854044	0.47142
DUSP6	0.155497	9.11527	3.8073	0.000149206	0.000858176	0.466455
GTPBP6	-0.0984406	8.49436	-3.80707	0.000149342	0.000858497	0.465612
PAPD7	0.0904226	8.33319	3.80575	0.000150132	0.000862575	0.460728
PRR16	-0.10438	5.1065	-3.80512	0.000150505	0.000864009	0.45843
UAP1L1	-0.102946	6.21438	-3.80506	0.000150543	0.000864009	0.4582
DENND2D	0.153788	7.888	3.80479	0.000150706	0.000864217	0.457195
PRX	-0.0999839	7.1215	-3.80473	0.00015074	0.000864217	0.456986
MTNR1B	-0.067865	4.46784	-3.80419	0.000151063	0.000865606	0.455005
TNS4	-0.0713784	5.16428	-3.80343	0.000151524	0.000867785	0.452183
ZNF639	0.0835482	7.38444	3.80234	0.00015218	0.000871072	0.448189
DEPDC5	-0.0736478	5.95855	-3.80187	0.000152465	0.000872237	0.446457
SRPR	-0.0735101	9.31098	-3.79979	0.000153733	0.000879026	0.438788
RDH5	-0.129342	7.72935	-3.79891	0.000154274	0.000881649	0.435536
ITSN1	0.124814	8.26772	3.79715	0.000155356	0.000887357	0.42907
ARMC9	0.0901567	6.13892	3.79565	0.000156283	0.000892177	0.423564
PGAP3	-0.0878859	7.81359	-3.79537	0.000156457	0.00089245	0.422535
LIG3	-0.063969	6.05465	-3.7953	0.000156497	0.00089245	0.422295
C17orf53	-0.0661345	5.05395	-3.79435	0.00015709	0.000895355	0.418796
GPD2	0.127952	6.95325	3.79407	0.000157265	0.000895878	0.417763
LRRC15	-0.101613	5.119	-3.79387	0.00015739	0.000896111	0.417031
THTPA	-0.0801652	7.51563	-3.79333	0.000157729	0.000897567	0.415038
ATP6V0A2	0.0692462	6.70387	3.792	0.000158566	0.000901852	0.410139
RBM34	0.0890408	7.76565	3.79153	0.000158859	0.000903034	0.408436
THUMPD1	0.0806409	9.44337	3.78942	0.000160198	0.000910168	0.400664
RNF14	0.114736	8.91384	3.78667	0.000161954	0.000919654	0.390581
GAR1	0.0841554	7.68593	3.78509	0.000162972	0.000924944	0.384784
TESC	0.222015	7.14805	3.78437	0.000163437	0.000927096	0.382145
MST1R	-0.0668342	5.91713	-3.78337	0.000164082	0.000930263	0.3785
PLEKHM2	-0.0949757	8.13104	-3.78308	0.000164274	0.000930855	0.377422
TBKBP1	-0.0780998	6.73612	-3.78283	0.000164435	0.000931278	0.376513
DDX28	-0.0679578	6.95747	-3.78256	0.000164614	0.000931799	0.375507
ABT1	-0.0697743	7.69401	-3.78191	0.000165034	0.00093368	0.373153
CHRNA10	-0.0643736	4.47727	-3.78168	0.000165185	0.000933911	0.372305
SEL1L3	0.215577	8.75184	3.78159	0.000165249	0.000933911	0.371948
C3orf36	-0.0700129	4.85961	-3.78093	0.000165678	0.000935842	0.36955
L1CAM	0.151656	7.82174	3.78076	0.000165788	0.000935974	0.368933
JAG1	0.135223	8.9481	3.77915	0.000166849	0.000941468	0.363031
DOC2A	-0.063592	6.4802	-3.77827	0.000167434	0.000944274	0.359792
FIG4	0.0595388	7.97999	3.77668	0.000168489	0.000949723	0.353982
WRAP53	-0.0632572	6.51243	-3.7754	0.000169345	0.000954048	0.349294
DHX30	-0.0797665	7.76166	-3.77427	0.000170099	0.00095779	0.345188
CACNG4	-0.0709504	5.35304	-3.77379	0.000170423	0.000958675	0.343427
CENPE	-0.10973	4.96137	-3.77377	0.000170435	0.000958675	0.343363
SGCA	-0.156181	6.15608	-3.77266	0.000171187	0.000962397	0.339293
BECN1	0.0866077	10.0793	3.77173	0.000171815	0.000965424	0.335904
ATHL1	0.119365	6.90677	3.77055	0.00017262	0.000969441	0.331579
NFATC3	0.0779549	7.75489	3.77003	0.000172972	0.000970425	0.329695
CDC14A	0.0770905	4.74725	3.77003	0.000172977	0.000970425	0.329672
EXOC2	0.0847435	6.94253	3.76969	0.000173209	0.000971219	0.328432
ELK4	-0.116285	5.67765	-3.76843	0.000174071	0.000975329	0.323841
HHEX	0.204865	5.7794	3.76835	0.000174124	0.000975329	0.323561
MAP3K7	0.117577	7.79675	3.76774	0.000174549	0.000977198	0.321307
CA7	-0.0865997	5.42148	-3.76759	0.00017465	0.000977256	0.32077
TMEM41B	0.0752078	8.90491	3.76595	0.000175782	0.000983074	0.314797
BIRC3	0.302218	7.02109	3.76541	0.000176161	0.000984682	0.312805
WDR19	0.0822758	6.63805	3.76502	0.000176427	0.000985326	0.311408
ME2	-0.0952686	8.41525	-3.76498	0.00017646	0.000985326	0.311236
TDRD7	0.107172	7.18501	3.76431	0.000176925	0.000987408	0.308803
TAF5	0.0868592	5.83904	3.76395	0.000177176	0.000987974	0.307492
TRANK1	0.0999922	8.88256	3.7639	0.00017721	0.000987974	0.307311
PDE1A	0.173883	8.10206	3.76217	0.000178421	0.000994208	0.301014
TBC1D3	0.112686	8.4966	3.76172	0.000178742	0.000995478	0.299354
SMAP1	0.071038	8.57071	3.76052	0.000179586	0.000999659	0.294998
PPM1B	0.0737933	9.08829	3.75963	0.000180216	0.00100265	0.29176
RFNG	-0.0929994	7.48483	-3.75941	0.000180373	0.001003	0.290957
LRP1	-0.103239	7.4825	-3.75912	0.000180582	0.00100364	0.289887
PAPPA2	-0.10747	6.77506	-3.75875	0.000180841	0.00100456	0.288558
TRAPPC6A	-0.102893	8.5382	-3.75747	0.000181759	0.00100899	0.283879
ASCC2	-0.0817054	7.4284	-3.75737	0.000181828	0.00100899	0.283529
MAT2B	0.060964	10.3874	3.75697	0.000182115	0.00101006	0.282072
LMTK2	-0.109136	6.01083	-3.75551	0.000183164	0.00101536	0.276763
SF3B5	0.0733358	10.707	3.75471	0.000183743	0.00101804	0.273844
SLC22A18	-0.20334	9.13959	-3.75438	0.000183981	0.00101883	0.272647
KIAA0753	0.09013	7.3792	3.75281	0.00018512	0.00102461	0.266944
TIAF1	-0.111415	6.34253	-3.7523	0.000185496	0.00102616	0.265068
MMADHC	0.0744783	10.2451	3.75027	0.000186982	0.00103385	0.257692
LONP1	-0.0922018	8.71478	-3.74997	0.000187205	0.00103455	0.25659
AP1S1	-0.178402	7.68665	-3.74959	0.000187478	0.00103552	0.255243
DCP1A	0.0744516	7.77846	3.74821	0.000188499	0.00104062	0.250225
PLAGL2	-0.0696682	6.84418	-3.74808	0.000188598	0.00104064	0.24974
PIGL	-0.0734471	5.53141	-3.74613	0.000190049	0.001048	0.242657
PARP3	-0.069155	8.12186	-3.74602	0.000190128	0.001048	0.24227
PHKG1	-0.0986058	6.27397	-3.74583	0.000190271	0.00104825	0.241576
SSX3	-0.0532507	3.0798	-3.74517	0.000190766	0.00105044	0.239176
DLG3	0.0907931	7.03845	3.74363	0.000191926	0.00105628	0.233574
SIRT2	-0.106254	7.86373	-3.74292	0.000192461	0.00105868	0.231
ZNF804A	-0.0876391	3.50967	-3.74254	0.000192745	0.00105932	0.229639
SH3BGRL3	-0.151898	9.44463	-3.7425	0.000192774	0.00105932	0.229498
PIGR	0.232002	11.324	3.74234	0.000192898	0.00105946	0.228903
EED	0.0899076	7.60666	3.74184	0.000193278	0.001061	0.227085
ANO3	-0.0694992	4.21194	-3.74096	0.000193945	0.00106412	0.223901
CRLF1	-0.104391	6.5303	-3.74064	0.000194191	0.00106466	0.222731
LNPEP	0.0980666	4.99233	3.74057	0.000194243	0.00106466	0.222483
PDP1	0.0958399	8.15148	3.74042	0.000194355	0.00106473	0.221949
CPVL	0.167828	10.1834	3.73945	0.000195095	0.00106824	0.218438
PIAS4	-0.0608829	7.89925	-3.73837	0.000195926	0.00107201	0.214514
GPR137	-0.0617256	9.12035	-3.73829	0.000195984	0.00107201	0.21424
NMT2	0.102217	7.09014	3.73784	0.000196331	0.00107332	0.212606
CGGBP1	0.086887	9.11878	3.7375	0.000196597	0.00107332	0.211353
INSRR	-0.072081	5.36734	-3.73746	0.00019662	0.00107332	0.211243
FEV	-0.0826764	5.45942	-3.73746	0.000196623	0.00107332	0.211231
TBC1D29	-0.0823273	4.59981	-3.73635	0.00019748	0.00107745	0.207211
AP2B1	0.0721746	9.21449	3.73591	0.000197826	0.00107878	0.205596
LRRC41	-0.0886637	8.44445	-3.73533	0.000198273	0.00108067	0.203511
PPM1D	0.0886236	7.06113	3.73462	0.000198824	0.00108313	0.200946
CTRB1	-0.055457	3.40819	-3.73425	0.00019911	0.00108413	0.19962
DBT	0.151141	7.47519	3.73397	0.000199328	0.00108446	0.198608
RANBP10	-0.0626722	7.43247	-3.73379	0.000199471	0.00108446	0.197947
VHL	0.0966549	7.81347	3.73379	0.000199473	0.00108446	0.197937
TRIM52	0.0808586	8.00891	3.73297	0.000200117	0.00108741	0.194959
ARID3B	-0.0687818	6.98397	-3.73269	0.000200333	0.00108803	0.193963
SUSD5	-0.0902611	4.17103	-3.7307	0.0002019	0.00109598	0.186764
IFNA1	-0.107336	4.04069	-3.72913	0.000203146	0.00110219	0.181081
MAK16	0.0860262	7.35324	3.72536	0.000206163	0.001118	0.167461
ALPK1	0.12597	5.75707	3.72378	0.000207437	0.00112434	0.161771
ROR1	-0.0970955	6.73507	-3.72298	0.000208088	0.00112729	0.158878
PON2	0.158078	9.32178	3.72156	0.000209244	0.00113298	0.153764
STX2	0.111001	8.03931	3.7195	0.000210938	0.00114158	0.146316
SLC9A1	-0.0659079	7.86345	-3.71762	0.000212485	0.00114935	0.139569
ATXN2L	0.090275	7.56617	3.7175	0.000212588	0.00114935	0.139119
SUPT6H	-0.082239	8.13335	-3.71697	0.000213024	0.00115112	0.13723
TRIP10	-0.0818736	7.34596	-3.71637	0.000213523	0.00115324	0.13507
PRPS1	0.0708259	8.75896	3.71593	0.000213892	0.00115465	0.133473
ASXL2	0.066938	8.50528	3.71472	0.000214908	0.00115955	0.1291
PIGH	0.107662	7.79487	3.71235	0.000216902	0.00116972	0.120573
LHFP	0.189976	9.13366	3.71205	0.000217155	0.00117049	0.119498
MCM9	0.0944071	7.28955	3.71148	0.000217637	0.00117251	0.117449
GDAP2	0.104614	6.92648	3.71106	0.000217996	0.00117385	0.115926
SLAMF1	0.140359	5.49722	3.70784	0.000220743	0.00118805	0.104365
PTP4A2	0.0730193	10.6897	3.70574	0.000222558	0.00119721	0.0968084
SON	0.0826243	9.978	3.7038	0.00022424	0.0012054	0.0898576
HOXA1	0.0995341	5.42802	3.70373	0.000224304	0.0012054	0.089594
ASAP2	0.104088	9.22321	3.7034	0.000224589	0.00120611	0.0884228
DUSP11	0.0590135	8.09835	3.70332	0.000224662	0.00120611	0.0881221
APPL1	-0.0774432	8.26252	-3.70309	0.000224857	0.00120655	0.0873229
NXF2	-0.114209	4.59966	-3.70116	0.000226556	0.00121506	0.0803735
[truncated: 2,588 more rows]

## Sheet: Table S2
Gene Symbol	Description
ADAR	Adenosine Deaminase RNA Specific
AIFM1	Apoptosis Inducing Factor Mitochondria Associated 1
AIFM2	Apoptosis Inducing Factor Mitochondria Associated 2
AIM2	Absent In Melanoma 2
ANGPT2	Angiopoietin 2
ANXA1	Annexin A1
AREL1	Apoptosis Resistant E3 Ubiquitin Protein Ligase 1
ATG5	Autophagy Related 5
AURKA	Aurora Kinase A
AURKC	Aurora Kinase C
AVEN	Apoptosis And Caspase Activation Inhibitor
AXL	AXL Receptor Tyrosine Kinase
BBC3	BCL2 Binding Component 3
BCL2	BCL2 Apoptosis Regulator
BCL2L1	BCL2 Like 1
BID	BH3 Interacting Domain Death Agonist
BIRC2	Baculoviral IAP Repeat Containing 2
BIRC3	Baculoviral IAP Repeat Containing 3
BMI1	BMI1 Proto-Oncogene, Polycomb Ring Finger
BRD4	Bromodomain Containing 4
C5	Complement C5
C6	Complement C6
C7	Complement C7
C9	Complement C9
CASP10	Caspase 10
CASP2	Caspase 2
CASP6	Caspase 6
CASP8	Caspase 8
CD274	CD274 Molecule
CD40LG	CD40 Ligand
CD74	CD74 Molecule
CDC37	Cell Division Cycle 37, HSP90 Cochaperone
CDK9	Cyclin Dependent Kinase 9
CFLAR	CASP8 And FADD Like Apoptosis Regulator
CHMP4B	Charged Multivesicular Body Protein 4B
CTSB	Cathepsin B
CXCL5	C-X-C Motif Chemokine Ligand 5
CYLD	CYLD Lysine 63 Deubiquitinase
DAPK1	Death Associated Protein Kinase 1
DIABLO	Diablo IAP-Binding Mitochondrial Protein
DNM1L	Dynamin 1 Like
EGR1	Early Growth Response 1
ESR2	Estrogen Receptor 2
EZH2	Enhancer Of Zeste 2 Polycomb Repressive Complex 2 Subunit
FADD	Fas Associated Via Death Domain
FAS	Fas Cell Surface Death Receptor
FASLG	Fas Ligand
FASN	Fatty Acid Synthase
FKBP1A	FKBP Prolyl Isomerase 1A
FLOT1	Flotillin 1
FLOT2	Flotillin 2
FMR1	Fragile X Messenger Ribonucleoprotein 1
FNDC4	Fibronectin Type III Domain Containing 4
FNDC5	Fibronectin Type III Domain Containing 5
FPR1	Formyl Peptide Receptor 1
GJB1	Gap Junction Protein Beta 1
GNLY	Granulysin
GSDMD	Gasdermin D
GSK3A	Glycogen Synthase Kinase 3 Alpha
GSK3B	Glycogen Synthase Kinase 3 Beta
HGF	Hepatocyte Growth Factor
HMGB1	High Mobility Group Box 1
HNRNPA1	Heterogeneous Nuclear Ribonucleoprotein A1
HSP90AA1	Heat Shock Protein 90 Alpha Family Class A Member 1
HSPA5	Heat Shock Protein Family A (Hsp70) Member 5
HTRA2	HtrA Serine Peptidase 2
ID1	Inhibitor Of DNA Binding 1
IFNB1	Interferon Beta 1
IKBKB	Inhibitor Of Nuclear Factor Kappa B Kinase Subunit Beta
IL37	Interleukin 37
IL6	Interleukin 6
IPMK	Inositol Polyphosphate Multikinase
ITPK1	Inositol-Tetrakisphosphate 1-Kinase
JUN	Jun Proto-Oncogene, AP-1 Transcription Factor Subunit
KL	Klotho
KLHDC10	Kelch Domain Containing 10
MAP3K7	Mitogen-Activated Protein Kinase Kinase Kinase 7
MAPK14	Mitogen-Activated Protein Kinase 14
MEFV	MEFV Innate Immunity Regulator, Pyrin
MERTK	MER Proto-Oncogene, Tyrosine Kinase
METTL3	Methyltransferase 3, N6-Adenosine-Methyltransferase Complex Catalytic Subunit
MIF	Macrophage Migration Inhibitory Factor
MKRN1	Makorin Ring Finger Protein 1
MLKL	Mixed Lineage Kinase Domain Like Pseudokinase
MTX1	Metaxin 1
MTX2	Metaxin 2
MYC	MYC Proto-Oncogene, BHLH Transcription Factor
MYD88	MYD88 Innate Immune Signal Transduction Adaptor
MYH9	Myosin Heavy Chain 9
NAT1	N-Acetyltransferase 1
NAT2	N-Acetyltransferase 2
NFE2L2	NFE2 Like BZIP Transcription Factor 2
NFKB1	Nuclear Factor Kappa B Subunit 1
NFKBIA	NFKB Inhibitor Alpha
NGFR	Nerve Growth Factor Receptor
NOX4	NADPH Oxidase 4
OGT	O-Linked N-Acetylglucosamine (GlcNAc) Transferase
OTULIN	OTU Deubiquitinase With Linear Linkage Specificity
PANX1	Pannexin 1
PARP1	Poly(ADP-Ribose) Polymerase 1
PDCD6IP	Programmed Cell Death 6 Interacting Protein
PELI1	Pellino E3 Ubiquitin Protein Ligase 1
PGLYRP1	Peptidoglycan Recognition Protein 1
PITPNA	Phosphatidylinositol Transfer Protein Alpha
PLK1	Polo Like Kinase 1
PPP1R3G	Protein Phosphatase 1 Regulatory Subunit 3G
PRKAA1	Protein Kinase AMP-Activated Catalytic Subunit Alpha 1
PRKAA2	Protein Kinase AMP-Activated Catalytic Subunit Alpha 2
PRKN	Parkin RBR E3 Ubiquitin Protein Ligase
PTEN	Phosphatase And Tensin Homolog
PTGER3	Prostaglandin E Receptor 3
PTGES3	Prostaglandin E Synthase 3
RALBP1	RalA Binding Protein 1
RB1	RB Transcriptional Corepressor 1
RCN1	Reticulocalbin 1
RELA	RELA Proto-Oncogene, NF-KB Subunit
RIPK1	Receptor Interacting Serine/Threonine Kinase 1
RIPK3	Receptor Interacting Serine/Threonine Kinase 3
SERTAD1	SERTA Domain Containing 1
SFTPA1	Surfactant Protein A1
SIRT2	Sirtuin 2
SIRT3	Sirtuin 3
SIRT5	Sirtuin 5
SIRT6	Sirtuin 6
SLC25A37	Solute Carrier Family 25 Member 37
SLC39A7	Solute Carrier Family 39 Member 7
SOAT1	Sterol O-Acyltransferase 1
SP1	Sp1 Transcription Factor
SPATA2	Spermatogenesis Associated 2
SQSTM1	Sequestosome 1
SRC	SRC Proto-Oncogene, Non-Receptor Tyrosine Kinase
STING1	Stimulator Of Interferon Response CGAMP Interactor 1
STUB1	STIP1 Homology And U-Box Containing Protein 1
TIMM50	Translocase Of Inner Mitochondrial Membrane 50
TLR4	Toll Like Receptor 4
TNF	Tumor Necrosis Factor
TNFAIP3	TNF Alpha Induced Protein 3
TNFRSF10A	TNF Receptor Superfamily Member 10a
TNFRSF10B	TNF Receptor Superfamily Member 10b
TNFRSF12A	TNF Receptor Superfamily Member 12A
TNFRSF1A	TNF Receptor Superfamily Member 1A
TNFRSF21	TNF Receptor Superfamily Member 21
TNFSF10	TNF Superfamily Member 10
TNFSF12	TNF Superfamily Member 12
TNIP1	TNFAIP3 Interacting Protein 1
TNIP3	TNFAIP3 Interacting Protein 3
TP53	Tumor Protein P53
TP53I3	Tumor Protein P53 Inducible Protein 3
TRADD	TNFRSF1A Associated Via Death Domain
TRAF2	TNF Receptor Associated Factor 2
TRAF5	TNF Receptor Associated Factor 5
TRIM72	Tripartite Motif Containing 72
TRPC6	Transient Receptor Potential Cation Channel Subfamily C Member 6
TRPM7	Transient Receptor Potential Cation Channel Subfamily M Member 7
TXN	Thioredoxin
TYRO3	TYRO3 Protein Tyrosine Kinase
UBE2H	Ubiquitin Conjugating Enzyme E2 H
UCHL1	Ubiquitin C-Terminal Hydrolase L1
UHRF1	Ubiquitin Like With PHD And Ring Finger Domains 1
USP22	Ubiquitin Specific Peptidase 22
UVRAG	UV Radiation Resistance Associated
XIAP	X-Linked Inhibitor Of Apoptosis
ZBP1	Z-DNA Binding Protein 1
ZFP91	ZFP91 Zinc Finger Protein, Atypical E3 Ubiquitin Ligase
ZNF7	Zinc Finger Protein 7

## Sheet: Table S3
Gene Symbol
ADAR
ANXA1
ATG5
AURKC
BCL2L1
BIRC2
BIRC3
BRD4
C9
CASP6
CASP8
CDC37
CDK9
CFLAR
CTSB
DAPK1
EGR1
FADD
GNLY
GSK3A
HMGB1
HNRNPA1
HSPA5
HTRA2
IKBKB
ITPK1
JUN
KLHDC10
MAP3K7
MAPK14
MEFV
MKRN1
MTX1
NFE2L2
NFKB1
OGT
PELI1
PGLYRP1
PITPNA
PRKAA1
PRKAA2
PTGES3
RB1
SIRT2
SIRT6
SLC25A37
SLC39A7
SOAT1
SPATA2
STUB1
TIMM50
TNFRSF10B
TNIP1
TRAF5
TRPC6

## Sheet: Table S4
Sample	Cluster
GSM533921	C1
GSM533922	C2
GSM533924	C2
GSM533925	C2
GSM533928	C4
GSM533929	C2
GSM533930	C3
GSM533932	C1
GSM533933	C1
GSM533934	C3
GSM533938	C2
GSM533939	C2
GSM533940	C1
GSM533941	C2
GSM533942	C2
GSM533943	C2
GSM533944	C1
GSM533945	C1
GSM533946	C4
GSM533947	C2
GSM533948	C2
GSM533949	C1
GSM533950	C2
GSM533953	C1
GSM533954	C3
GSM533958	C1
GSM533960	C1
GSM533961	C2
GSM533962	C1
GSM533965	C3
GSM533966	C2
GSM533968	C4
GSM533969	C1
GSM533970	C3
GSM533971	C3
GSM533972	C1
GSM533974	C4
GSM533979	C1
GSM533981	C3
GSM533982	C4
GSM533983	C2
GSM533984	C2
GSM533985	C1
GSM533986	C2
GSM533987	C3
GSM533991	C2
GSM533992	C2
GSM533996	C2
GSM533997	C3
GSM533998	C2
GSM533999	C2
GSM534000	C1
GSM534002	C2
GSM534003	C3
GSM534004	C3
GSM534011	C3
GSM534012	C4
GSM534013	C2
GSM534015	C2
GSM534017	C1
GSM534019	C2
GSM534021	C4
GSM534022	C3
GSM534025	C3
GSM534027	C3
GSM534029	C2
GSM534030	C2
GSM534031	C1
GSM534035	C2
GSM534037	C1
GSM534038	C4
GSM534040	C3
GSM534041	C4
GSM534042	C1
GSM534044	C2
GSM534045	C4
GSM534046	C4
GSM534047	C3
GSM534048	C3
GSM534049	C3
GSM534051	C2
GSM534052	C4
GSM534053	C3
GSM534057	C4
GSM534058	C3
GSM534059	C3
GSM534060	C2
GSM534066	C3
GSM534068	C3
GSM534069	C3
GSM534071	C3
GSM534072	C3
GSM534074	C2
GSM534076	C1
GSM534077	C3
GSM534079	C3
GSM534080	C3
GSM534081	C2
GSM534084	C3
GSM534085	C2
GSM534088	C3
GSM534089	C3
GSM534090	C2
GSM534093	C4
GSM534096	C1
GSM534097	C4
GSM534098	C2
GSM534099	C3
GSM534100	C3
GSM534101	C2
GSM534102	C4
GSM534103	C1
GSM534104	C1
GSM534105	C2
GSM534107	C1
GSM534113	C2
GSM534114	C3
GSM534116	C4
GSM534117	C3
GSM534118	C3
GSM534119	C4
GSM534122	C2
GSM534123	C2
GSM534124	C3
GSM534125	C2
GSM534126	C3
GSM534127	C4
GSM534128	C2
GSM534129	C2
GSM534131	C2
GSM534132	C2
GSM534133	C2
GSM534134	C3
GSM534135	C3
GSM534136	C2
GSM534137	C2
GSM534138	C2
GSM534139	C1
GSM534140	C2
GSM534141	C4
GSM534142	C4
GSM534143	C1
GSM534144	C2
GSM534145	C2
GSM534146	C1
GSM534147	C1
GSM534148	C2
GSM534149	C2
GSM534150	C1
GSM534151	C1
GSM534153	C2
GSM534155	C2
GSM534156	C2
GSM534159	C4
GSM534163	C1
GSM534164	C1
GSM534166	C2
GSM534167	C2
GSM534168	C2
GSM534169	C4
GSM534172	C2
GSM534178	C1
GSM534179	C1
GSM534181	C3
GSM534185	C3
GSM534186	C1
GSM534188	C2
GSM534189	C2
GSM534191	C1
GSM534192	C3
GSM534194	C1
GSM534197	C2
GSM534198	C1
GSM534200	C3
GSM534201	C4
GSM534202	C2
GSM533926	C1
GSM533927	C4
GSM533931	C1
GSM533935	C2
GSM533936	C4
GSM533937	C3
GSM533957	C1
GSM533959	C3
GSM533975	C1
GSM533976	C1
GSM533977	C1
GSM533978	C2
GSM533980	C4
GSM533988	C4
GSM533989	C1
GSM533990	C4
GSM534001	C1
GSM534007	C4
GSM534010	C4
GSM534014	C1
GSM534016	C1
GSM534020	C4
GSM534023	C4
GSM534024	C1
GSM534028	C1
GSM534032	C4
GSM534033	C3
GSM534039	C1
GSM534055	C3
GSM534064	C4
GSM534087	C3
GSM534094	C4
GSM534095	C3
GSM534106	C1
GSM534112	C1
GSM534115	C1
GSM534120	C1
GSM534121	C2
GSM534130	C2
GSM534152	C2
GSM534154	C4
GSM534158	C1
GSM534162	C4
GSM534170	C4
GSM534171	C4
GSM534176	C1
GSM534180	C2
GSM534182	C4
GSM534183	C4
GSM534184	C2
GSM534190	C4
GSM534193	C1
GSM534195	C4
GSM534196	C1
GSM534199	C4
GSM533923	C1
GSM533967	C4
GSM533973	C1
GSM533993	C3
GSM533994	C1
GSM534006	C1
GSM534018	C4
GSM534026	C1
GSM534034	C1
GSM534036	C4
GSM534050	C4
GSM534054	C4
GSM534056	C3
GSM534061	C1
GSM534065	C1
GSM534067	C3
GSM534073	C4
GSM534075	C3
GSM534078	C3
GSM534082	C3
GSM534083	C1
GSM534086	C3
GSM534091	C3
GSM534111	C4
GSM534157	C4
GSM534160	C4
GSM534161	C4
GSM534165	C2
GSM534173	C1
GSM534177	C1
GSM533951	C4
GSM533952	C4
GSM533955	C1
GSM533956	C1
GSM533963	C1
GSM533964	C4
GSM533995	C1
GSM534005	C4
GSM534008	C1
GSM534009	C4
GSM534043	C4
GSM534062	C2
GSM534063	C4
GSM534070	C3
GSM534092	C4
GSM534108	C4
GSM534109	C1
GSM534110	C4
GSM534174	C4
GSM534175	C4
GSM534187	C4
